# Supplementary material for: Pacific Biosciences assembly with Hi-C mapping generates an improved, chromosome-level goose genome
Source: PubMed Central journal article supplement (PMC7585555; doi:10.1093/gigascience/giaa114), 2020-10-24
Supplement: giaa114_giga-d-20-00133_original_submission.pdf [file giaa114_giga-d-20-00133_original_submission.pdf]

## PacBio assembly with Hi-C mapping generates an improved, chromosome-level goose genome

--Manuscript Draft--

|                                                    |                                                                                                                                                                                                                                                                                                                                                                                                                                                                                                                                                                                                                                                                                                                                                                                                                                                                                                                                                                                                                                                                                                                                                                                                                                                                                                                                                                                                                                                                                                                                                                                                                                                                                                                                                     |                   |
|----------------------------------------------------|-----------------------------------------------------------------------------------------------------------------------------------------------------------------------------------------------------------------------------------------------------------------------------------------------------------------------------------------------------------------------------------------------------------------------------------------------------------------------------------------------------------------------------------------------------------------------------------------------------------------------------------------------------------------------------------------------------------------------------------------------------------------------------------------------------------------------------------------------------------------------------------------------------------------------------------------------------------------------------------------------------------------------------------------------------------------------------------------------------------------------------------------------------------------------------------------------------------------------------------------------------------------------------------------------------------------------------------------------------------------------------------------------------------------------------------------------------------------------------------------------------------------------------------------------------------------------------------------------------------------------------------------------------------------------------------------------------------------------------------------------------|-------------------|
| <b>Manuscript Number:</b>                          | GIGA-D-20-00133                                                                                                                                                                                                                                                                                                                                                                                                                                                                                                                                                                                                                                                                                                                                                                                                                                                                                                                                                                                                                                                                                                                                                                                                                                                                                                                                                                                                                                                                                                                                                                                                                                                                                                                                     |                   |
| <b>Full Title:</b>                                 | PacBio assembly with Hi-C mapping generates an improved, chromosome-level goose genome                                                                                                                                                                                                                                                                                                                                                                                                                                                                                                                                                                                                                                                                                                                                                                                                                                                                                                                                                                                                                                                                                                                                                                                                                                                                                                                                                                                                                                                                                                                                                                                                                                                              |                   |
| <b>Article Type:</b>                               | Data Note                                                                                                                                                                                                                                                                                                                                                                                                                                                                                                                                                                                                                                                                                                                                                                                                                                                                                                                                                                                                                                                                                                                                                                                                                                                                                                                                                                                                                                                                                                                                                                                                                                                                                                                                           |                   |
| <b>Funding Information:</b>                        | National Key R & D Program of China (2018YFD0500403)                                                                                                                                                                                                                                                                                                                                                                                                                                                                                                                                                                                                                                                                                                                                                                                                                                                                                                                                                                                                                                                                                                                                                                                                                                                                                                                                                                                                                                                                                                                                                                                                                                                                                                | Prof. Mingzhou Li |
|                                                    | National Natural Science Foundation of China (U19A2036)                                                                                                                                                                                                                                                                                                                                                                                                                                                                                                                                                                                                                                                                                                                                                                                                                                                                                                                                                                                                                                                                                                                                                                                                                                                                                                                                                                                                                                                                                                                                                                                                                                                                                             | Prof. Mingzhou Li |
|                                                    | National Natural Science Foundation of China (31872335)                                                                                                                                                                                                                                                                                                                                                                                                                                                                                                                                                                                                                                                                                                                                                                                                                                                                                                                                                                                                                                                                                                                                                                                                                                                                                                                                                                                                                                                                                                                                                                                                                                                                                             | Not applicable    |
|                                                    | National Natural Science Foundation of China (31772576)                                                                                                                                                                                                                                                                                                                                                                                                                                                                                                                                                                                                                                                                                                                                                                                                                                                                                                                                                                                                                                                                                                                                                                                                                                                                                                                                                                                                                                                                                                                                                                                                                                                                                             | Prof. Mingzhou Li |
|                                                    | National Natural Science Foundation of China (31802044)                                                                                                                                                                                                                                                                                                                                                                                                                                                                                                                                                                                                                                                                                                                                                                                                                                                                                                                                                                                                                                                                                                                                                                                                                                                                                                                                                                                                                                                                                                                                                                                                                                                                                             | Dr. Yan Li        |
|                                                    | China Postdoctoral Science Foundation (2018M643514)                                                                                                                                                                                                                                                                                                                                                                                                                                                                                                                                                                                                                                                                                                                                                                                                                                                                                                                                                                                                                                                                                                                                                                                                                                                                                                                                                                                                                                                                                                                                                                                                                                                                                                 | Dr. Yan Li        |
| <b>Abstract:</b>                                   | <p><b>Background</b></p> <p>The domestic goose is an economically important and scientifically valuable waterfowl; however, a lack of high-quality genomic data has hindered research concerning its genome, genetics, and breeding. As domestic geese breeds derive from both the swan goose ( <i>Anser cygnoides</i> ) and the graylag goose ( <i>Anser anser</i> ), we selected a female Tianfu goose ( <i>A. anser</i> × <i>A. cygnoides</i> ) for genome sequencing. We generated a high-quality goose genome assembly by adopting a hybrid de novo assembly approach that combined PacBio single-molecule real-time sequencing, high-throughput chromatin conformation capture mapping, and Illumina short-read sequencing.</p> <p><b>Findings</b></p> <p>We generated a 1.11 Gb goose genome with contig and scaffold N50 values of 1.85 Mb and 33.12 Mb, respectively. The assembly contains 39 chromosomes (2n = 78) accounting for ca. 88.36% of the goose genome. Compared with previous goose assemblies, our assembly has more continuity, completeness, and accuracy; the annotation of core eukaryotic genes and universal single-copy orthologs has also been improved. We have identified 17,568 protein-coding genes (PCGs) and a repeat content of 8.67% (96.57 Mb) in this genome assembly. We also explored the spatial organization of chromatin and gene expression in the goose genome, in terms of inter-chromosomal interaction patterns, compartments, topologically associating domains, and promoter-enhancer interactions.</p> <p><b>Conclusions</b></p> <p>We present the first chromosome-level assembly of the goose genome. This will be a valuable resource for future genetic and genomic studies on geese.</p> |                   |
| <b>Corresponding Author:</b>                       | Mingzhou Li, Ph.D.<br>Sichuan Agricultural University<br>Chengdu, Sichuan CHINA                                                                                                                                                                                                                                                                                                                                                                                                                                                                                                                                                                                                                                                                                                                                                                                                                                                                                                                                                                                                                                                                                                                                                                                                                                                                                                                                                                                                                                                                                                                                                                                                                                                                     |                   |
| <b>Corresponding Author Secondary Information:</b> |                                                                                                                                                                                                                                                                                                                                                                                                                                                                                                                                                                                                                                                                                                                                                                                                                                                                                                                                                                                                                                                                                                                                                                                                                                                                                                                                                                                                                                                                                                                                                                                                                                                                                                                                                     |                   |

|                                                                                                                                                                                                                                                                                                                                                                                   |                                 |
|-----------------------------------------------------------------------------------------------------------------------------------------------------------------------------------------------------------------------------------------------------------------------------------------------------------------------------------------------------------------------------------|---------------------------------|
| <b>Corresponding Author's Institution:</b>                                                                                                                                                                                                                                                                                                                                        | Sichuan Agricultural University |
| <b>Corresponding Author's Secondary Institution:</b>                                                                                                                                                                                                                                                                                                                              |                                 |
| <b>First Author:</b>                                                                                                                                                                                                                                                                                                                                                              | Yan Li                          |
| <b>First Author Secondary Information:</b>                                                                                                                                                                                                                                                                                                                                        |                                 |
| <b>Order of Authors:</b>                                                                                                                                                                                                                                                                                                                                                          | Yan Li                          |
|                                                                                                                                                                                                                                                                                                                                                                                   | Guangliang Gao                  |
|                                                                                                                                                                                                                                                                                                                                                                                   | Yu Lin                          |
|                                                                                                                                                                                                                                                                                                                                                                                   | Silu Hu                         |
|                                                                                                                                                                                                                                                                                                                                                                                   | Yi Luo                          |
|                                                                                                                                                                                                                                                                                                                                                                                   | Guosong Wang                    |
|                                                                                                                                                                                                                                                                                                                                                                                   | Long Jin                        |
|                                                                                                                                                                                                                                                                                                                                                                                   | Qigui Wang                      |
|                                                                                                                                                                                                                                                                                                                                                                                   | Jiwen Wang                      |
|                                                                                                                                                                                                                                                                                                                                                                                   | Qianzi Tang                     |
| Mingzhou Li, Ph.D.                                                                                                                                                                                                                                                                                                                                                                |                                 |
| <b>Order of Authors Secondary Information:</b>                                                                                                                                                                                                                                                                                                                                    |                                 |
| <b>Additional Information:</b>                                                                                                                                                                                                                                                                                                                                                    |                                 |
| <b>Question</b>                                                                                                                                                                                                                                                                                                                                                                   | <b>Response</b>                 |
| Are you submitting this manuscript to a special series or article collection?                                                                                                                                                                                                                                                                                                     | No                              |
| <b>Experimental design and statistics</b>                                                                                                                                                                                                                                                                                                                                         | Yes                             |
| <p>Full details of the experimental design and statistical methods used should be given in the Methods section, as detailed in our <a href="#">Minimum Standards Reporting Checklist</a>. Information essential to interpreting the data presented should be made available in the figure legends.</p> <p>Have you included all the information requested in your manuscript?</p> |                                 |
| <b>Resources</b>                                                                                                                                                                                                                                                                                                                                                                  | Yes                             |
| <p>A description of all resources used, including antibodies, cell lines, animals and software tools, with enough information to allow them to be uniquely identified, should be included in the Methods section. Authors are strongly</p>                                                                                                                                        |                                 |

|                                                                                                                                                                                                                                                                                                                                                                                                                                                                                                                                                         |            |
|---------------------------------------------------------------------------------------------------------------------------------------------------------------------------------------------------------------------------------------------------------------------------------------------------------------------------------------------------------------------------------------------------------------------------------------------------------------------------------------------------------------------------------------------------------|------------|
| <p>encouraged to cite <a href="#">Research Resource Identifiers</a> (RRIDs) for antibodies, model organisms and tools, where possible.</p> <p>Have you included the information requested as detailed in our <a href="#">Minimum Standards Reporting Checklist</a>?</p>                                                                                                                                                                                                                                                                                 |            |
| <p><b>Availability of data and materials</b></p> <p>All datasets and code on which the conclusions of the paper rely must be either included in your submission or deposited in <a href="#">publicly available repositories</a> (where available and ethically appropriate), referencing such data using a unique identifier in the references and in the “Availability of Data and Materials” section of your manuscript.</p> <p>Have you have met the above requirement as detailed in our <a href="#">Minimum Standards Reporting Checklist</a>?</p> | <p>Yes</p> |

# 1 PacBio assembly with Hi-C mapping generates an improved, chromosome-level goose genome

2 Yan Li<sup>1,†</sup>, Guangliang Gao<sup>1,2,†,\*</sup>, Yu Lin<sup>1,†</sup>, Silu Hu<sup>1</sup>, Yi Luo<sup>1</sup>, Guosong Wang<sup>1,3</sup>, Long Jin<sup>1</sup>, Qigui Wang<sup>2</sup>,  
3 Jiwen Wang<sup>1</sup>, Qianzi Tang<sup>1</sup>, Mingzhou Li<sup>1,\*</sup>

4  
5 <sup>1</sup>Institute of Animal Genetics and Breeding, College of Animal Science and Technology, Sichuan  
6 Agricultural University, Chengdu 611130, China;

7 <sup>2</sup>Institute of Poultry Science, Chongqing Academy of Animal Sciences, Chongqing 402460, China;

8 <sup>3</sup>Department of Animal Science, Texas A&M University, College Station 77843, United States of  
9 America

10 <sup>†</sup>These authors contributed equally to this paper.

11 \* Corresponding author(s): Guangliang Gao: [guanglianggaocq@hotmail.com](mailto:guanglianggaocq@hotmail.com); Mingzhou Li:  
12 [mingzhou.li@sicau.edu.cn](mailto:mingzhou.li@sicau.edu.cn).

## 13 Abstract

### 14 Background:

15 The domestic goose is an economically important and scientifically valuable waterfowl; however,  
16 a lack of high-quality genomic data has hindered research concerning its genome, genetics, and breeding.  
17 As domestic geese breeds derive from both the swan goose (*Anser cygnoides*) and the graylag goose  
18 (*Anser anser*), we selected a female Tianfu goose (*A. anser* × *A. cygnoides*) for genome sequencing. We  
19 generated a high-quality goose genome assembly by adopting a hybrid *de novo* assembly approach that  
20 combined PacBio single-molecule real-time sequencing, high-throughput chromatin conformation  
21 capture mapping, and Illumina short-read sequencing.

### 22 Findings:

23 We generated a 1.11 Gb goose genome with contig and scaffold N50 values of 1.85 Mb and 33.12

24 Mb, respectively. The assembly contains 39 chromosomes ( $2n = 78$ ) accounting for ca. 88.36% of the  
25 goose genome. Compared with previous goose assemblies, our assembly has more continuity,  
26 completeness, and accuracy; the annotation of core eukaryotic genes and universal single-copy orthologs  
27 has also been improved. We have identified 17,568 protein-coding genes (PCGs) and a repeat content of  
28 8.67% (96.57 Mb) in this genome assembly. We also explored the spatial organization of chromatin and  
29 gene expression in the goose genome, in terms of inter-chromosomal interaction patterns, compartments,  
30 topologically associating domains, and promoter-enhancer interactions.

### 31 **Conclusions:**

32 We present the first chromosome-level assembly of the goose genome. This will be a valuable  
33 resource for future genetic and genomic studies on geese.

34 **Key Words:** goose genome, chromosome-length assembly, hybrid *de novo* assembly approaches,  
35 annotation, Pacbio, Hi-C

36

## 37 **Data description**

### 38 **Context**

39 The goose is a member of the family Anatidae and is an economically important waterfowl with  
40 distinctive characters. Domesticated geese derive from the swan goose (*Anser cygnoides*) and the graylag  
41 goose (*Anser anser*)<sup>1</sup>, and approximately 6,000 years of artificial selection have led to significant  
42 alterations in their body size, reproductive performance, egg production, feather color, and other features<sup>2</sup>.  
43 Currently, more than 181 domesticated breeds are reared globally to supply meat, eggs, and valuable  
44 byproducts (feathers, fatty liver) for human consumption<sup>2,3,4</sup>. The domestic goose is also well suited to  
45 sustainable production practices because fiber can form part of its diet, which then lessens competition  
46 for human food<sup>5</sup>. Its excellent disease resistance and behavioral patterns also allow for large-scale

47 farming and easy management<sup>6</sup>. Interestingly, despite the liver weight of goose increasing 5–10 times  
48 after two to three weeks of overfeeding, the amount of fat in hepatic cells (and other biomedical  
49 parameters) returns to normal levels when overfeeding ceases. This suggests that the goose liver could  
50 provide a novel animal model for the study of human non-alcoholic fatty liver disease<sup>6</sup>.

51 The goose was one of the earliest animals to be domesticated<sup>2,7</sup>, and wide-ranging genomic and  
52 breeding research has been conducted to study its domestication process and the unique morphological  
53 and physiological features of these animals. For example, recently published goose genome sequences  
54 have been assembled into scaffolds using short reads from the Illumina platform<sup>8,9</sup>; however, the genetic  
55 basis of the fatty liver of goose and their selective breeding remains largely unknown. To address such  
56 issues, a high-quality genome sequence is required. Currently, there are many advantages to using hybrid  
57 *de novo* assembly approaches to improve the quality of genome assemblies. This is because short,  
58 accurate reads from the Illumina platform can be combined with the longer, less accurate reads generated  
59 by the single-molecule real-time (SMRT) sequencing platform<sup>10</sup>. With Hi-C, linking information can  
60 then be ordered and oriented into scaffolds, after which assembly errors can be identified and corrected<sup>11</sup>.  
61 This approach has been applied to improve the genome assemblies of many species, including humans<sup>12</sup>,  
62 goats<sup>13</sup>, rockfish<sup>14</sup>, *Aedes aegypti*<sup>11</sup>, and barley<sup>15</sup>.

63 Here, we have generated a high-quality goose assembly with chromosome-length scaffolds by  
64 adopting a hybrid *de novo* assembly approach using a combination of short reads from the Illumina  
65 platform, long reads from the PacBio platform, and Hi-C-based chromatin interaction maps. Our draft  
66 goose genome comprises fewer scaffolds than currently available goose genome assemblies, and these  
67 scaffolds are of a higher-quality and are more continuous and accurate. Our new genome assembly thus  
68 provides a valuable resource for exploring the molecular basis of the morphological and physiological

69 features of the goose, and will facilitate further genomic, genetic, and breeding studies of this  
70 domesticated waterfowl.

## 71 **Methods**

### 72 **a) Sample collection and sequencing**

73 We extracted genomic DNA from the liver tissue of a healthy adult female (136 days old) from the  
74 Tianfu goose maternal line, which was provided by the Experimental Farm of Waterfowl Breeding of  
75 Sichuan Agricultural University (Chengdu, Sichuan, China; **Figure 1**). We then carried out single-  
76 molecule real-time DNA sequencing of ca. 20-kb inserts using the PacBio Sequel platform. This yielded  
77 approximately 84.31 Gb of high-quality sequence data that were used to initially assemble the genome  
78 (**Table 1**). Next, 149.70 Gb of high-quality sequence data were generated from a 350-bp insert size Hi-  
79 C library, as previously reported<sup>13</sup>. Finally, 350-bp paired-end libraries constructed from the same  
80 genomic DNA were sequenced on the Illumina HiSeq platform, producing a further 181.52 Gb of  
81 sequence data. In total, we obtained approximately 415.53 Gb of high-quality sequencing data (ca.  
82 324.63× coverage) for our draft assembly of the goose genome (**Table 1**).

### 83 **b) *De novo* assembly of the goose genome**

84 The size of the goose genome was estimated by k-mer distribution analysis to be 1.28 Gb. To  
85 assemble the genome, we first performed an initial assembly with the PacBio long-reads alone, using  
86 Falcon<sup>16</sup> software. We used the pbsmrtpipe pipeline of the smrtlink software to correct this assembly  
87 sequence, which resulted in a draft assembly with a contig N50 of 1.72 Mb (**Table S1**). Next, we used  
88 the single-molecule sequence reads to scaffold these contigs and fill gaps, using SSPACE-Long<sup>17</sup> and  
89 PBJelly<sup>18</sup>, respectively. Pilon<sup>19</sup> software was then used to map the short reads to the assembly and correct  
90 sequence errors (**Table S1**). Most of these scaffolds were assembled into 39 chromosomes when the Hi-

91 C reads were aligned using Lachesis<sup>20</sup> software (**Table S2, Figure S1**); this is consistent with the number  
92 of goose chromosomes ( $2n = 78$ ) reported in previous studies<sup>21</sup>. With these methods we generated a high-  
93 quality goose assembly with a contig N50 of 1.85 Mb and scaffold N50 of 33.12 Mb (**Table 2**). The  
94 average GC content is 42.15% and the total genome size is 1.11 Gb, which is consistent with previous  
95 studies<sup>8,9</sup> and suggests that our goose assembly is reliable.

### 96 **c) Repeat sequence and gene annotation**

97 *De novo* methods and homology-based approaches were used to annotate the repeat content of the  
98 goose genome. First, we used *ab initio*-prediction software, including LTR-finder<sup>22</sup>, RepeatMolder<sup>23</sup>, and  
99 RepeatScout<sup>24</sup>, to perform *de novo* annotation of the genome. For homology-based predictions, we  
100 identified repeat regions across species in published RepBase sequences<sup>25</sup> using RepeatMasker<sup>26</sup> and  
101 RepeatProteinMask<sup>27</sup> software. Combined with these results, the repeat region of the goose genome was  
102 further predicted with RepeatMasker software. From these analyses, we identified 92.11 Mb of repetitive  
103 DNA (**Table S3**) accounting for 8.67% of our assembly, which is much higher than has been reported in  
104 previous studies<sup>8,9</sup>. Long interspersed nuclear elements (LINEs) were the most abundant repeat element  
105 identified, representing 6.83% of the genome. The proportion of LINE repetitive sequences identified in  
106 this study was also higher than has been reported in two previous goose genome assemblies (**Table S3**).

107 We performed PCGs annotation by combining *ab initio*-based, homology-based, and RNA-  
108 sequencing-based prediction methods. First, GenScan<sup>28</sup>, Geneid<sup>29</sup>, and Augustus<sup>30</sup> were used for *ab*  
109 *initio*-based predictions. Next, we selected six high-quality genomes, namely *Homo sapiens*  
110 (GCF\_000001405.39), *Mus musculus* (GCF\_000001635.26), *Gallus gallus* (GCF\_000002315.6), *Anas*  
111 *platyrhynchos* (GCF\_003850225.1), *Meleagris gallopavo* (GCF\_000146605.3), and *Taeniopygia guttata*  
112 (GCF\_003957565.1), to use for homology-based annotation of our goose draft genome using



113 TBLASTN<sup>31</sup> and GeneWise<sup>32</sup> software. We found 8,255 common orthologous groups across these seven  
114 species (**Figure S2**). To optimize genome annotation, total RNA was extracted from 11 samples  
115 (abdominal fat, brain, duodenum, heart, liver, lung, muscular stomach, ovary, pancreas, pectoral muscle,  
116 and spleen) taken from the same individual whose DNA was used for the draft genome assembly. We  
117 pooled equal amounts of the total RNA from each of the 11 tissues and then performed RNA-seq on this  
118 pooled sample using the Illumina platform. After filtering, these data were used to annotate protein-  
119 coding regions of the genome assembly using Trinity<sup>33</sup> and TopHat<sup>34</sup>. Finally, the predictions from each  
120 method described above were integrated using EVM<sup>35</sup>; overall, 17,568 PCGs were predicted (**Table 3**,  
121 **Figure 2**). To identify long noncoding RNAs (lncRNAs), the goose genome reads were aligned by  
122 STAR<sup>36</sup> and subjected to Cufflinks<sup>37</sup> and TACO<sup>38</sup> for assembly and filtering. CPC2<sup>39</sup> was then applied to  
123 perform coding potential analysis, and PfamScan<sup>40</sup> was used to check for domain hits against Pfam31-  
124 A<sup>41</sup>. After removing all likely domains, 3,287 lncRNAs and 542 transcripts of uncertain coding potential  
125 were identified.

## 126 **Data validation and quality control**

### 127 **a) Assessment of genome assembly completeness**

128 Our assembly has more scaffolds and fewer contigs, and significantly improved contig and scaffold  
129 N50 values, than the goose genome assemblies presented in two previous studies (**Figure 3**). Moreover,  
130 we have annotated more repeat and coding sequence regions than these previous studies (**Table 3**), which  
131 suggests that we have generated an improved genome assembly and annotation. The 39 chromosomes  
132 described in our study account for 88.36% of the assembled genome and are longer than those previously  
133 reported<sup>8,9</sup>, again indicating that our draft goose genome represents a significant improvement on  
134 previous work. The GC content of our genome assembly is 42% and the size of the genome is 1.11 Gb

135 (Table 2). This is comparable to the sizes reported for the two previously constructed goose genomes<sup>8,9</sup>  
136 and is characteristic of avian genomes<sup>42</sup>. We also mapped short-insert paired-end reads (350 bp) to our  
137 draft goose genome and obtained mapping and coverage rates of 97.25% and 99.71%, respectively.  
138 Finally, we downloaded 19 wild goose resequencing<sup>43</sup> datasets from public databases and mapped them  
139 to our assembly, and to the two earlier draft goose genomes. We found that the mapping rate of our  
140 assembly was higher than that of the previously assembled genomes (Table S4), indicating that it is more  
141 contiguous. Taken together, these results demonstrate the improvements made by our study in the  
142 assembly and annotation of the goose genome, in comparison to previous studies<sup>8,9</sup>.

143 To evaluate the completeness of our draft genome, we determined the number of conserved  
144 eukaryotic and universal genes present in our assembly by applying the core eukaryotic genes mapping  
145 approach software (CEGMA) and using a set of benchmarking universal single-copy orthologs (BUSCO).  
146 We found that 211 of the 248 (85.08%) core eukaryotic genes and 2,586 (97%) of the universal single-  
147 copy orthologs were assembled in our genome. Compared with previous studies, this suggests that our  
148 genome assembly is more complete than previous drafts of the goose genome<sup>8,9</sup>.

149 To explore the hypothesis that the leptin gene was lost from goose<sup>8</sup>, we downloaded leptin sequences  
150 from avian and mammal genomes to use as reference sequences in BLASTP searches of our newly  
151 assembled goose genome. We found no sequences similar to leptin in our draft assembly. Furthermore,  
152 although the human genome region that contains the leptin gene (chromosome 7, 126.0 to 129.4 Mb)  
153 aligned with the goose genome, we did not find a sequence similar to the leptin gene in this region. These  
154 results confirm the previous finding that the leptin gene is not present in the goose genome<sup>8</sup>.

## 155 **b) Phylogenetic tree and lineage-specific gene families**

156 Using OrthoMCL<sup>44</sup>, 16,157 orthologous gene families across 17 species (ostrich, duck, goose,

157 chicken, turkey, saker, red-legged seriema, African crowned crane, pelican, little egret, crested ibis,  
158 cormorant, great crested grebe, pigeon, woodpecker, zebra finch, and lizard) were identified. Based on  
159 2,389 shared single-copy ortholog gene clusters, we constructed a maximum likelihood phylogenetic tree  
160 using the RAxML software<sup>45</sup>. This revealed that goose and duck diverged about 31.60 million years ago  
161 (Mya), which is comparable to the divergence time of chicken and turkey (32.33 Mya; **Figure S3**). We  
162 also noted that lineage-specific genes in the goose genome were significantly enriched for olfactory  
163 receptor activity (GO:0004984,  $p = 3.85 \times 10^{-24}$ ), G protein-coupled receptor activity (GO:0004930,  $p =$   
164  $6.67 \times 10^{-13}$ ), and integral component of membrane (GO:0016021,  $p = 0.01$ ; **Table S5**). As a migratory  
165 bird, the goose is adapted for long-distance migration, which exposes them to a diversity of food as they  
166 seek out ideal habitats. We propose that such influences could strengthen the interactions between  
167 odorants and the receptors of the olfactory mucosa, and could underlie receptor family evolution in the  
168 goose genome.

### 169 **c) Expansion and contraction of gene families**

170 The expansions and contractions of gene clusters in the goose genome were identified in comparison  
171 to nine other avian genomes using the CAFE program<sup>46</sup>. We found 839 expanded gene families (**Table**  
172 **S6**) and 2,193 contracted gene families (**Table S7**). Interestingly, the expanded gene families were mainly  
173 enriched for olfactory receptor activity (GO:0004984,  $p = 8.58 \times 10^{-51}$ ), G protein-coupled receptor  
174 activity (GO:0004930,  $p = 5.81 \times 10^{-25}$ ), and integral component of membrane (GO:0016021,  $p =$   
175  $3.20 \times 10^{-6}$ ), which is consistent with the results from our analysis of lineage-specific genes (**Table S5**).  
176 This further confirms that the migratory adaptations of the goose are reflected by unique characteristics  
177 in the goose genome that contrast with those of nonmigratory birds. Other expanded gene families were  
178 enriched for ATPase-coupled transmembrane transporter activity (GO:0042626,  $p = 1.96 \times 10^{-06}$ ),

179 NAD(P)<sup>+</sup>-protein-arginine ADP-ribosyl transferase activity (GO:0003956,  $p = 3.20 \times 10^{-04}$ ), ATPase  
180 activity (GO:0016887,  $p = 8.28 \times 10^{-05}$ ), and aspartic-type endopeptidase activity (GO:0004190,  $p =$   
181  $9.63 \times 10^{-06}$ ; **Table S6**), while gene families contracted in the goose were significantly enriched for  
182 transmembrane transport (GO:0055085,  $p = 8.30 \times 10^{-04}$ ), ion channel activity (GO:0005216,  $p =$   
183  $1.87 \times 10^{-9}$ ), ion transmembrane transport (GO:0034220,  $p = 5.30 \times 10^{-6}$ ), and ATPase-coupled  
184 intramembrane lipid transporter activity (GO:0140326,  $p = 8.60 \times 10^{-10}$ ; **Table S7**). As these pathways  
185 are related to ATP utilization, ATP production, and energy regulation, these data support a previous  
186 finding that goose energy metabolism is different to that in other avian species<sup>47</sup>. This feature of the  
187 goose is likely related to its migratory habits and artificial selection—the goose is unique among  
188 migratory birds because of its large body size, which requires much energy for long-distance, high  
189 altitude flying<sup>48</sup>.

#### 190 **d) Genes under positive selection**

191 We identified 52 positively selected genes (PSGs) in the goose genome based on orthologous genes  
192 from the 17 species above, using a branch-site model and F3x4 codon frequencies in Codeml (**Table S8**).  
193 Some of these PSGs, such as GCH1<sup>49</sup>, MDH2<sup>50</sup>, and OGFOD2<sup>51</sup> are involved in hypobaric hypoxia and  
194 hypoxic sensing. The viral transcription-related genes RPL7A<sup>52</sup>, SNW1<sup>53</sup>, and POU2F3<sup>54</sup> are also under  
195 positive selection in the goose, indicating that disease resistance may help the goose adapt to high  
196 altitude migration, and to harsh, changeable environments<sup>55, 56</sup>.

#### 197 **e) Initial characterization of the three-dimensional organization of goose genome**

198 We analyzed the inter-chromosomal interaction pattern<sup>57</sup>, compartments<sup>58, 59</sup>, topologically  
199 associating domains (TADs)<sup>60</sup>, and promoter-enhancer interactions (PEI)<sup>61</sup> of the goose genome. The  
200 matrix resolution of our Hi-C experiment reached ~2 Kb (defined as the smallest locus size such that 80%

201 of loci have at least 1,000 contacts), which was adequate for subsequent analyses of the chromatin  
202 architecture. Our results showed that the whole inter-chromosomal interaction pattern was distinguished  
203 by two clusters, that is, short chromosomes and longer chromosomes, which suggests that goose  
204 chromosomes tend to interact with one another on the basis of size (**Figure 4**). As for the identification  
205 of A and B compartments, which represent relatively active and inactive chromatin states, respectively,  
206 we found that the number of transcriptional start sites (TSSs) in each 100 Kb bin was significantly  
207 correlated with PC1 values ( $R = 0.39$ ,  $p = 2.2 \times 10^{-16}$ ; **Figure S5**), and that the transcripts per kilobase  
208 millions (TPMs) of PCGs located in A compartments were significantly higher than those in B  
209 compartments ( $p = 2.2 \times 10^{-16}$ ; **Figure S6, Table S9**). We identified 734 TADs across the goose assembly,  
210 accounting for 80% of the genome (**Figure S7, Table S10**). The mean and median sizes of the TADs  
211 were 1.21 Mb and 1.00 Mb, respectively. We also observed that the TSSs of PCGs were enriched in  
212 TAD-boundary regions (**Figure S8**). After filtering for interaction distances lower than 20 Kb, we  
213 identified 13,017 PEIs (**Table S11**) and found that gene expression levels positively correlated with the  
214 number of PEIs (**Figure S9**). This is suggestive of additive effects of enhancers on target-gene  
215 transcription levels.

## 216 **Availability of supporting data**

217 The goose assembled draft genome sequence is available at National Center for Biotechnology  
218 Information (NCBI) GenBank through the accession number WTSS00000000; The high-quality Hi-C  
219 data are available through the NCBI Sequence Read Archive (SRA) database under accession number  
220 SRR10483522. The high-quality PacBio long-read sequencing data have been deposited in the NCBI  
221 SRA (SRR10483521). The high-quality Illumina short-read sequencing data are available through NCBI  
222 SRA accession number: SRR10483516, SRR10483517, SRR10483518 and SRR10483520. The

223 transcriptome data are available through the NCBI SRR10483519.

## 224 **List of abbreviations**

225 (1) Anser anser : A. anser;

226 (2) Anser cygnoides : A. cygnoides;

227 (3) BUSCO: Benchmarking Universal Single-Copy Orthologs;

228 (4) CHMP1B: charged multivesicular body protein 1B;

229 (5) CEGMA: Core Eukaryotic Genes Mapping Approach software;

230 (6) GCH1: GTP cyclohydrolase 1;

231 (7) Hi-C, Chromosome conformation capture;

232 (8) IVNS1ABP: influenza virus NS1A binding protein;

233 (9) LINEs: Long interspersed nuclear elements;

234 (10) LncRNAs: long noncoding RNAs;

235 (11) OGFOD2: 2-oxoglutarate and iron dependent oxygenase domain containing 2

236 (12) MDH257: malate dehydrogenase 2

237 (13) PCGs: protein coding genes

238 (14) PEI: promoter-enhancer interactions;

239 (15) PSGs: positively selected genes;

240 (16) SMRT: single-molecule real-time;

241 (17) TADs: topological associated domains;

242 (18) TPMs: transcripts per kilobase millions.

243

## 244 **Ethics approval**

245 All animal experiments were approved and reviewed by Animal Care and Use Committee

246 Institutional of Sichuan Agricultural University (Approval No. DKY-B20121406) and the Ministry of

247 Science and Technology of the People's Republic of China (Approval No. 2006–398).

248

249 **Competing interests**

250 The authors declare no competing interest.

251

252 **Acknowledgments**

253 This work was supported by grants from the National Key R & D Program of China  
254 (2018YFD0500403), the National Natural Science Foundation of China (U19A2036, 31872335,  
255 31772576 and 31802044) and the China Postdoctoral Science Foundation (2018M643514).

256 **Author contributions**

257 Mingzhou Li, Guangliang Gao designed and supervised the project. Yan Li, Yu Lin, Qianzi Tang,  
258 Silu Hu performed bioinformatics analyses. Jiwen Wang, Yan Li and Yi Luo contributed to collect the  
259 samples. Mingzhou Li, Qigui Wang, Guangliang Gao, Yi Luo and Long Jin were involved in the data  
260 analyses and wrote the manuscript.

261

262 **References**

- 263 1. Shi XW, Wang JW, Zeng FT, et al. Mitochondrial DNA cleavage patterns distinguish independent  
264 origin of Chinese domestic geese and western domestic geese. *Biochem Genet.* 2006; 44(5-6) : 237-  
265 245.
- 266 2. Kozák J. Variations of geese under domestication. *World's Poult Sci J.* 2019; 75(2): 247-260.
- 267 3. Goluch-Koniuszy Z, Haraf G. Geese for slaughter and wild geese as a source of selected mineral  
268 elements in a diet. *J Elementol.* 2018; 23: 1343-1360.
- 269 4. Janan J, Tóth P, Hutás I, et al. Effects of dietary micronutrient supplementation on the reproductive  
270 traits of laying geese. *Acta Fytotech Zootech.* 2015; 18(1) : 6-9.
- 271 5. Zhang Y, Sha Z, Guan F, et al. Impacts of geese on weed communities in corn production systems

- 272 and associated economic benefits. *Biol Control*. 2016. 99: 47-52.
- 273 6. Wang G, Jin L, Li Y, et al. Transcriptomic analysis between Normal and high-intake feeding geese  
274 provides insight into adipose deposition and susceptibility to fatty liver in migratory birds. *BMC*  
275 *genomics*. 2019; 20(1): 372.
- 276 7. Honka J, Heino M, Kvist L, et al. Over a thousand years of evolutionary history of domestic geese  
277 from Russian archaeological sites, analysed using ancient DNA. *Genes*. 2018; 9(7): 367.
- 278 8. Lu L, Chen, Y, Wang Z, et al. The goose genome sequence leads to insights into the evolution of  
279 waterfowl and susceptibility to fatty liver. *Genome Biol*. 2015; 16(1): 89.
- 280 9. Gao G, Zhao X, Li Q, et al. Genome and metagenome analyses reveal adaptive evolution of the host  
281 and interaction with the gut microbiota in the goose. *Sci Rep*. 2016; 6: 32961.
- 282 10. Schadt E, Turner S, Kasarskis A. A window into third-generation sequencing. *Hum Mol Genet*.  
283 2010; 19(R2): R227-R240.
- 284 11. Dudchenko O, Batra SS, Omer AD, et al. *De novo* assembly of the *Aedes aegypti* genome using  
285 Hi-C yields chromosome-length scaffolds. *Science*. 2017; 356(6333): 92-95.
- 286 12. Pendleton M, Sebra R, Pang AWC, et al. Assembly and diploid architecture of an individual human  
287 genome via single-molecule technologies. *Nat Methods*. 2015; 12(8): 780–786.
- 288 13. Bickhart DM, Rosen BD, Koren S, et al. Single-molecule sequencing and chromatin conformation  
289 capture enable *de novo* reference assembly of the domestic goat genome. *Nat Genet*. 2017; 49(4):  
290 643.
- 291 14. Liu Q, Wang X, Xiao Y, et al. Sequencing of the black rockfish chromosomal genome provides  
292 insight into sperm storage in the female ovary. *DNA Research*, 2019. 26(6):453–464,
- 293 15. Mascher M, Gundlach H, Himmelbach A, et al. A chromosome conformation capture ordered



- 294 sequence of the barley genome. *Nature*. 2017; 544(7651): 427
- 295 16. Chin CS, Peluso P, Sedlazeck FJ et al. Phased diploid genome assembly with single molecule real-  
296 time sequencing. *Nat Methods*. 2016;13:1050.
- 297 17. Boetzer M, Pirovano W. SSPACE-LongRead: scaffolding bacterial draft genomes using long read  
298 sequence information. *BMC Bioinf*. 2014; 15(1): 211.
- 299 18. English AC, Richards S, Han Y, et al. Mind the gap: upgrading genomes with Pacific Biosciences  
300 RS long-read sequencing technology. *PLoS One*. 2012; 7(11): e47768.
- 301 19. Walker BJ, Abeel T, Shea T, et al. Pilon: an integrated tool for comprehensive microbial variant  
302 detection and genome assembly improvement. *Plos One*. 2014; 9(11): e112963.
- 303 20. Burton JN, Adey A, Patwardhan RP, et al. Chromosome-scale scaffolding of *de novo* genome  
304 assemblies based on chromatin interactions. *Nat Biotechnol*. 2013; 31(12): 1119–1125.
- 305 21. Jun X, Tianxing L, Qing C, et al. Karyotypes of Zhedong White Goose and Siji Goose. *China Poultry*.  
306 2007; 21(9): 27-29.
- 307 22. Benson G. Tandem repeats finder: a program to analyze DNA sequences. *Nucleic Acids Res*. 1999;  
308 27(2): 573–580.
- 309 23. RepeatMolder software. <http://www.repeatmasker.org/RepeatModeler/>.
- 310 24. Price AL, Jones NC, Pevzner PA. De novo identification of repeat families in large genomes.  
311 *Bioinformatics* 2005;21(suppl 1):i351–8.
- 312 25. Price AL, Jones NC, Pevzner PA. De novo identification of repeat families in large genomes.  
313 *Bioinformatics*. 2005;21:i351–8. Bao W, Kojima KK, Kohany O. Repbase Update, a database of  
314 repetitive elements in eukaryotic genomes. *Mobile DNA*. 2015; 6(1):11.
- 315 26. Maja TG, Nansheng C. Using RepeatMasker to identify repetitive elements in genomic sequences.

- 316 Curr Protoc Bioinf. 2009; 25(1): 4.10.11–14.10.14.
- 317 27. Allred DB, Cheng A, Sarikaya M, et al. . Three-dimensional architecture of inorganic nanoarrays  
318 electrodeposited through a surface-layer protein mask. Nano Lett. 2008;8(5):1434–8.
- 319 28. Burge C, Karlin S. Prediction of complete gene structures in human genomic DNA. J Mol Biol.  
320 1997; 268(1): 78–94.
- 321 29. Blanco E, Parra G, Guigó R. Using geneid to identify genes. Curr Protoc Bioinf. 2007; 18(1): 4.3.1-  
322 4.3.28.
- 323 30. Stanke M, Steinkamp R, Waack S. AUGUSTUS: a web server for gene finding in eukaryotes.  
324 Nucleic Acids Res. 2004; 32(suppl\_2): W309–W312.
- 325 31. Gertz EM, Yu YK, Agarwala, R., Schäffer, A. A. & Altschul, S. F. Composition-based statistics and  
326 translated nucleotide searches: improving the TBLASTN module of BLAST. BMC Biol. 2006; 4(1):  
327 41.
- 328 32. Birney E, Clamp M, Durbin R. Gene Wise and Genomewise. Genome Res. 2004; 14(5): 988–995.
- 329 33. Grabherr MG, Haas BJ, Yassour M, et al. Full-length transcriptome assembly from RNA-Seq data  
330 without a reference genome. Nat Biotechnol. 2011; 29(7): 644–652.
- 331 34. Trapnell C, Pachter L, Salzberg SL. TopHat: discovering splice junctions with RNA-Seq.  
332 Bioinformatics. 2009; 25(9): 1105–1111.
- 333 35. Haas BJ, Salzberg SL, Zhu W, et al. Automated eukaryotic gene structure annotation using  
334 EvidenceModeler and the Program to Assemble Spliced Alignments. Genome Biol. 2008; 9(1): R7.
- 335 36. Dobin A, Davis CA, Schlesinger F, et al. STAR: ultrafast universal RNA-seq aligner. Bioinformatics.  
336 2013; 29(1): 15–21.
- 337 37. Trapnell C, Williams BA, Pertea G, et al. Transcript assembly and quantification by RNA-Seq

- 338 reveals unannotated transcripts and isoform switching during cell differentiation. *Nat Biotechnol.*  
339 2010; 28(5): 511–515.
- 340 38. Niknafs YS, Pandian B, Iyer HK, et al. TACO produces robust multisample transcriptome  
341 assemblies from RNA-seq. *Nat Methods.* 2017; 14(1): 68.
- 342 39. Kang YJ, Yang DC, Kong L, et al. CPC2: a fast and accurate coding potential calculator based on  
343 sequence intrinsic features. *Nucleic Acids Res.* 2017; 45(W1): W12–W16.
- 344 40. Finn RD, Bateman A, Clements J, et al. Pfam: the protein families database. *Nucleic Acids Res.*  
345 2014; 42(D1): D222–D230.
- 346 41. Bateman A, Coin L, Durbin R, et al. The Pfam protein families database. *Nucleic Acids Res.* 2004;  
347 32 (suppl\_1): D138–D141.
- 348 42. Zhang G, Li C, Li Q, et al. Comparative genomics reveals insights into avian genome evolution and  
349 adaptation. *Science.* 2014; 346(6215): 1311–1320.
- 350 43. Ottenburghs J, Megens HJ, Kraus RH, et al. A history of hybrids? Genomic patterns of introgression  
351 in the True Geese. *BMC Evol Biol.* 2017; 17(1): 201.
- 352 44. Fischer S, Brunk BP, Chen F, et al. Using OrthoMCL to assign proteins to OrthoMCL- DB groups  
353 or to cluster proteomes into new ortholog groups. *Curr Protoc Bioinf.* 2011; 35(1): 6–12.
- 354 45. Stamatakis A. RAxML version 8: a tool for phylogenetic analysis and post-analysis of large  
355 phylogenies. *Bioinformatics.* 2014; 30(9): 1312–1313.
- 356 46. Bie T, Cristianini N, Demuth J. CAFE: a computational tool for the study of gene family evolution.  
357 *Bioinformatics.* 2006; 22(10): 1269–1271.
- 358 47. Józefiak DA, Rutkowski A, Martin SA. Carbohydrate fermentation in the avian ceca: a review.  
359 *Anim Feed Sci Technol.* 2004; 113(1–4): 1–15.

- 360 48. Watanabe, YY. Flight mode affects allometry of migration range in birds. *Ecol Lett.* 2016; 19(8):  
361 907-914.
- 362 49. He Y B, Duojizhuoma C Y, Cai-juan D B, et al. GCH1 plays a role in the high-altitude adaptation  
363 of Tibetans. *Zool Res.* 2017; 38(3): 155–162.
- 364 50. Lu H, Wang R, Li W, et al. Plasma proteomic study of acute mountain sickness susceptible and  
365 resistant individuals. *Sci Rep.* 2018; 8(1): 1-9.
- 366 51. McDonough M A, Loenarz C, Chowdhury R, et al. Structural studies on human 2-oxoglutarate  
367 dependent oxygenases. *Curr Opin Struct Biol.* 2010; 20(6): 659-672.
- 368 52. Brahma R, Gurumayum S, Naorem L D, et al. Identification of hub genes and pathways in Zika  
369 virus infection using RNA-seq data: a network-based computational approach. *Viral Immunol.* 2018;  
370 31(4): 321-332.
- 371 53. Verma S, De Jesus P, Chanda S K, et al. SNW1, a novel transcriptional regulator of the NF- $\kappa$ B  
372 pathway. *Mol Cell Biol.* 2019; 39(3): e00415-18.
- 373 54. Huang Y H, Klingbeil O, He X Y, et al. POU2F3 is a master regulator of a tuft cell-like variant of  
374 small cell lung cancer. *Gene Dev.* 2018; 32(13-14): 915-928.
- 375 55. Jones E, Fugger L, Strominger J. MHC class II proteins and disease: a structural perspective. *Nat*  
376 *Rev Immunol.* 2006; 6(4): 271.
- 377 56. Cardona C, Xing Z, Sandrock C. Avian influenza in birds and mammals. *Comp Immunol.* 2009;  
378 32(4): 255-273.
- 379 57. Battulin N, Fishman VS, Mazur AM, et al. Comparison of the three-dimensional organization of  
380 sperm and fibroblast genomes using the Hi-C approach. *Genome Biol.* 2016; 17(1): 6.
- 381 58. Lieberman-Aiden E, van Berkum NL, Williams L, et al. Comprehensive mapping of long-range

382 interactions reveals folding principles of the human genome. *Science*. 2009; 326(5950): 289-293.

383 59. Rowley MJ, Nichols MH, Lyu X, Ando-Kuri M, et al. Evolutionarily Conserved Principles Predict  
384 3D Chromatin Organization. *Mol Cell*. 2017; 67(5): 837-852.

385 60. Dixon JR, Selvaraj S, Yue F, et al. Topological domains in mammalian genomes identified by  
386 analysis of chromatin interactions. *Nature*. 2012; 485(7389): 376-380.

387 61. Ron G, Globerson Y, Moran D and Kaplan T. Promoter-enhancer interactions identified from Hi-C  
388 data using probabilistic models and hierarchical topological domains. *Nat Commun*. 2017; 8(1):  
389 2237.

**Table1 Summary of sequencing data for goose genome assembly.**

| <b>Pair-end libraries</b> | <b>Insert size (bp)</b> | <b>Total data (Gb)</b> | <b>Read length (bp)</b> | <b>Sequence coverage (x)</b> |
|---------------------------|-------------------------|------------------------|-------------------------|------------------------------|
| <b>Illumina reads</b>     | 350                     | 181.52                 | 150                     | 141.81                       |
| <b>Pacbio reads</b>       | 20,000                  | 84.31                  |                         | 65.86                        |
| <b>Hi-C</b>               | 350                     | 149.70                 | 150                     | 116.95                       |
| <b>Total</b>              |                         | 415.53                 |                         | 324.63                       |

**Table2 Comparison of quality metrics of this study and the previous goose genome assemblies.**

| <b>Genomic features</b>                | <b>This study</b> | <b>Lu <i>et al.</i><sup>a</sup></b> | <b>Gao <i>et al.</i><sup>b</sup></b> |
|----------------------------------------|-------------------|-------------------------------------|--------------------------------------|
| Estimate of genome size (bp)           | 1,277,099,016     | 1,208,661,181                       | 1,198,802,839                        |
| Total length of assembled contigs (bp) | 1,113,842,245     | 1,086,838,604                       | 1,100,859,441                        |
| Total size of assembled scaffolds (bp) | 1,113,913,845     | 1,122,178,121                       | 1,130,663,797                        |
| Number of contigs (>2kb)               | 2,771             | 60,979                              | 53,336                               |
| Number of scaffolds (>2kb)             | 2,055             | 1,050                               | 1,837                                |
| Contigs N50 (bp)                       | 1,849,874         | 27,602                              | 35,032                               |
| Scaffolds N50 (bp)                     | 33,116,532        | 5,202,740                           | 5,103,766                            |
| Longest contig (bp)                    | 10,766,871        | 201,281                             | 399,111                              |
| Longest scaffold (bp)                  | 70,896,740        | 24,051,356                          | 20,207,557                           |
| GC content (%)                         | 42.15             | 38.00                               | 41.68                                |
| Number of gene model                   | 17,568            | 16,150                              | 16,288                               |
| Repeats share in genome (%)            | 8.67              | 6.33                                | 6.90                                 |

<sup>a</sup> From the ref. 8. <sup>b</sup> From the ref. 9.

**Table 3 A comparative summary of predicted genes within each goose genome assembly.**

| <b>Property</b>                | <b>This study</b> | <b>Lu <i>et al.</i><sup>a</sup></b> | <b>Gao <i>et al.</i><sup>b</sup></b> |
|--------------------------------|-------------------|-------------------------------------|--------------------------------------|
| Total genes length (bp)        | 326,863,440       | 439,289,059                         | 500,923,091                          |
| Genes percentage of genome (%) | 29.34             | 39.25                               | 44.31                                |
| Total exons number             | 152,392           | 158,713                             | 167,532                              |
| Average exons per gene         | 8.67              | 10.92                               | 10.29                                |
| Total exons length (bp)        | 26,883,354        | 25,763,242                          | 26,157,477                           |
| Exons percentage of genome (%) | 2.41              | 2.31                                | 2.31                                 |
| Average exons length (bp)      | 176.41            | 162.33                              | 156.13                               |
| Average introns length (bp)    | 2224.97           | 2867.48                             | 3139.07                              |

<sup>a</sup> From the ref. 8. <sup>b</sup> From the ref. 9.



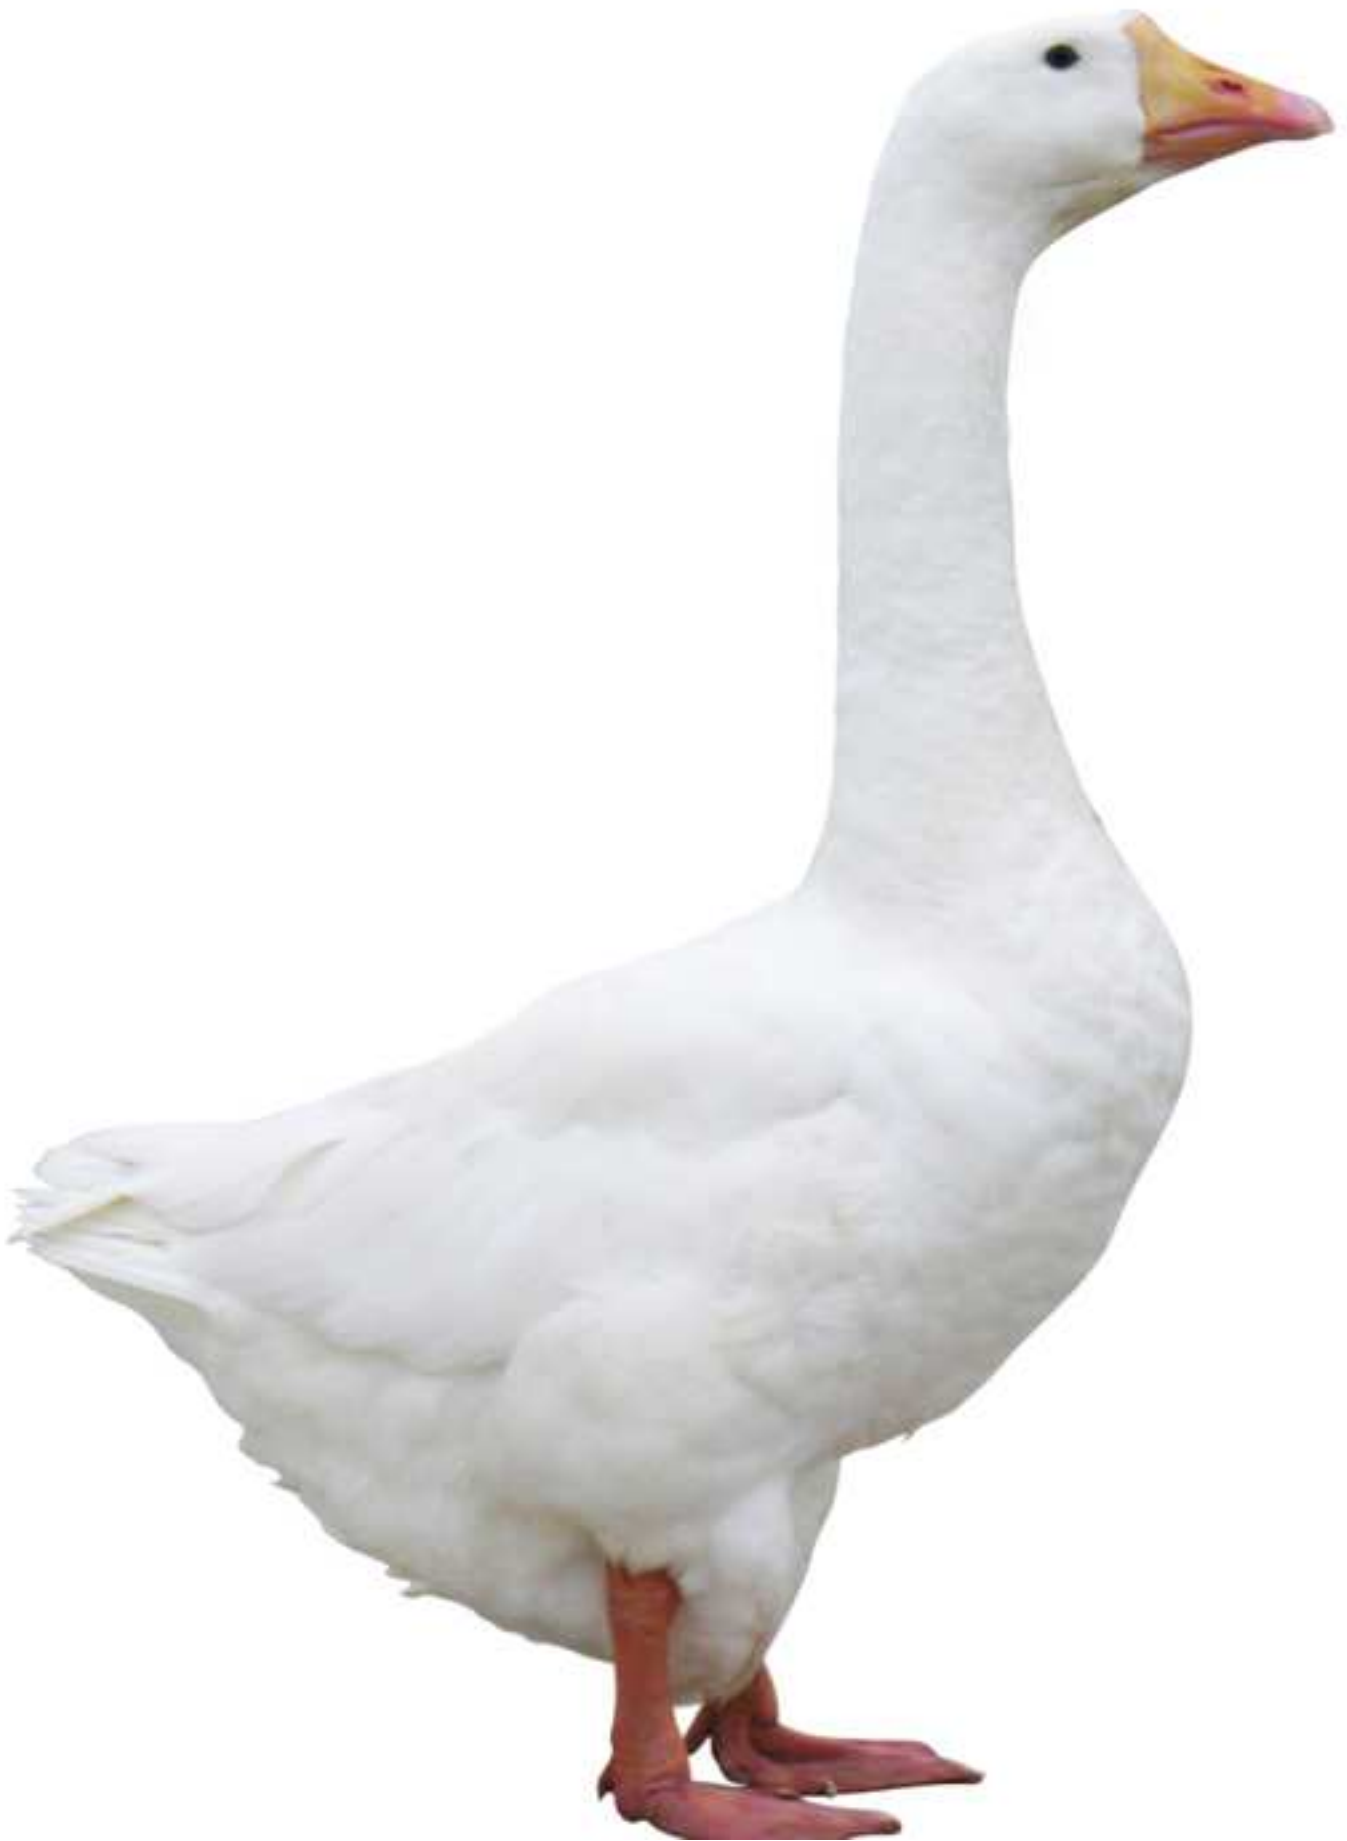

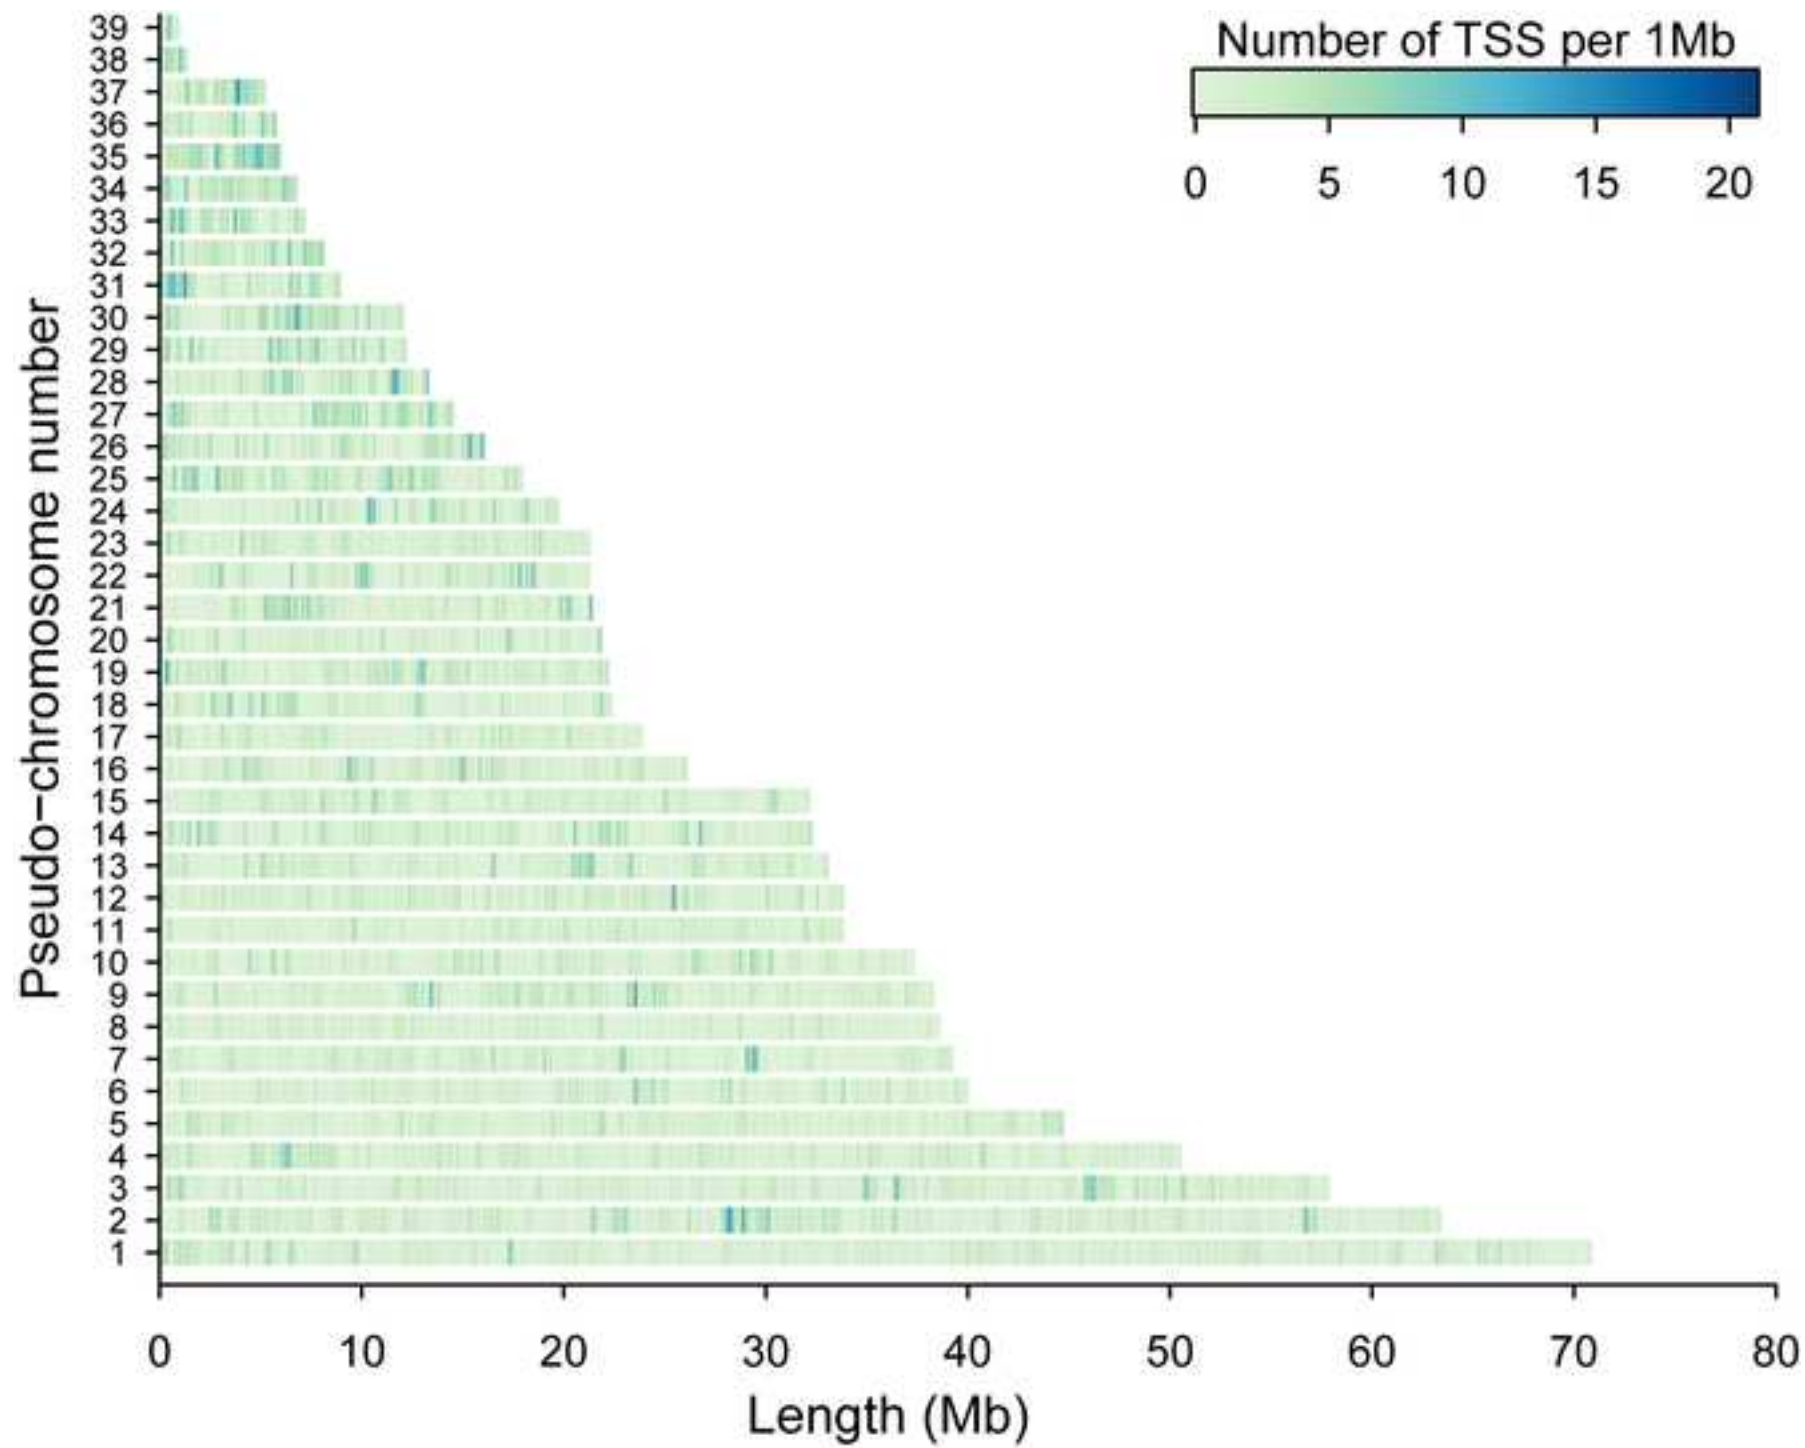

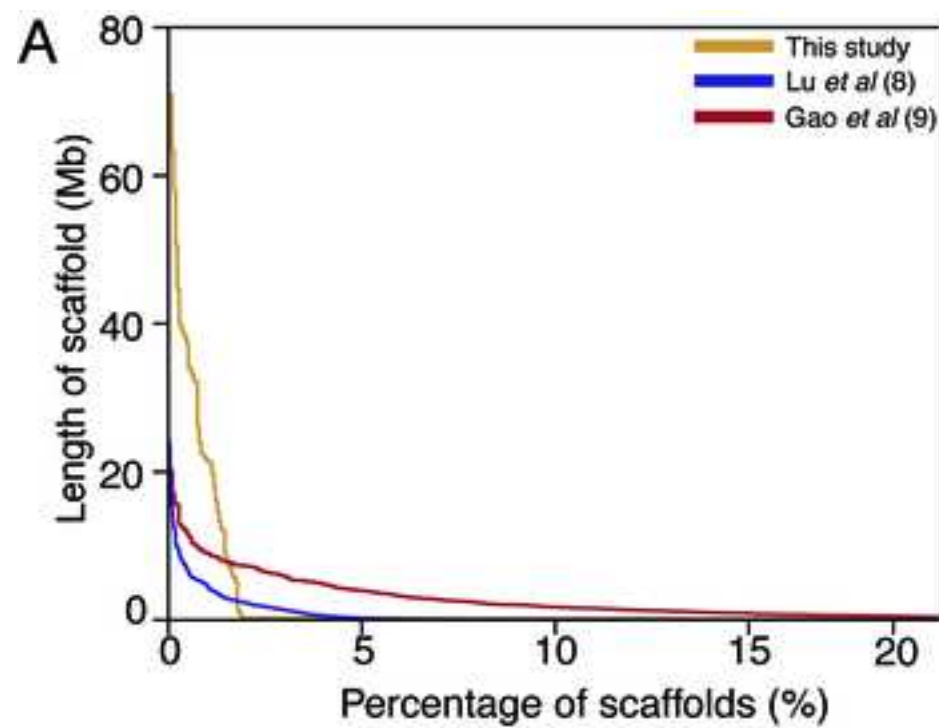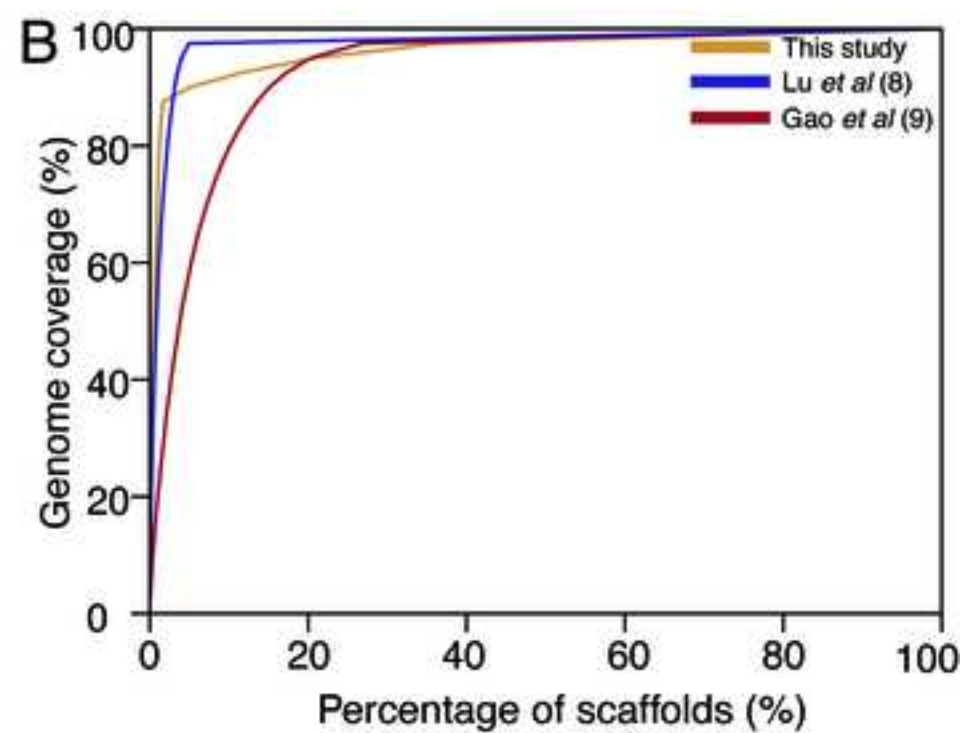

Figure 4 The dendrogram of inter-pseudo-chromosome interaction pattern generated by average linkage

[Click here to download Figure 4.tiff](#)

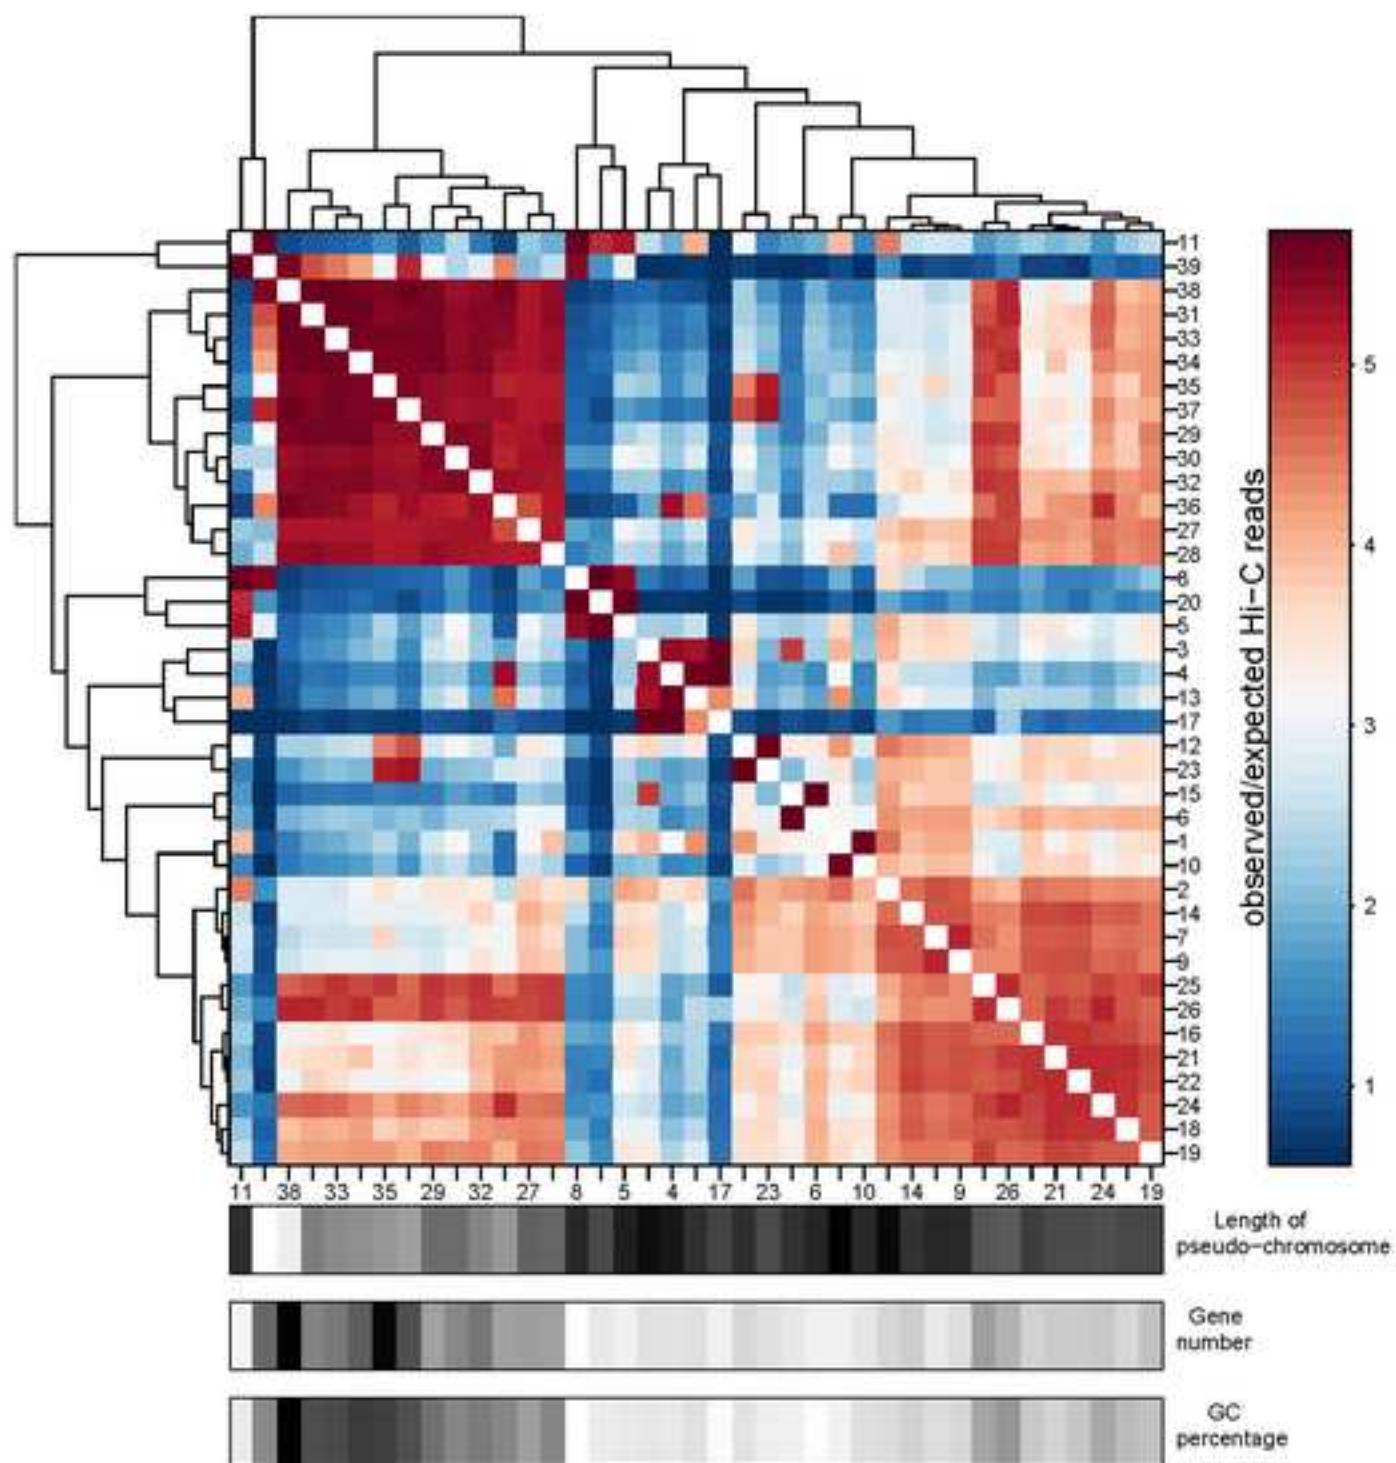



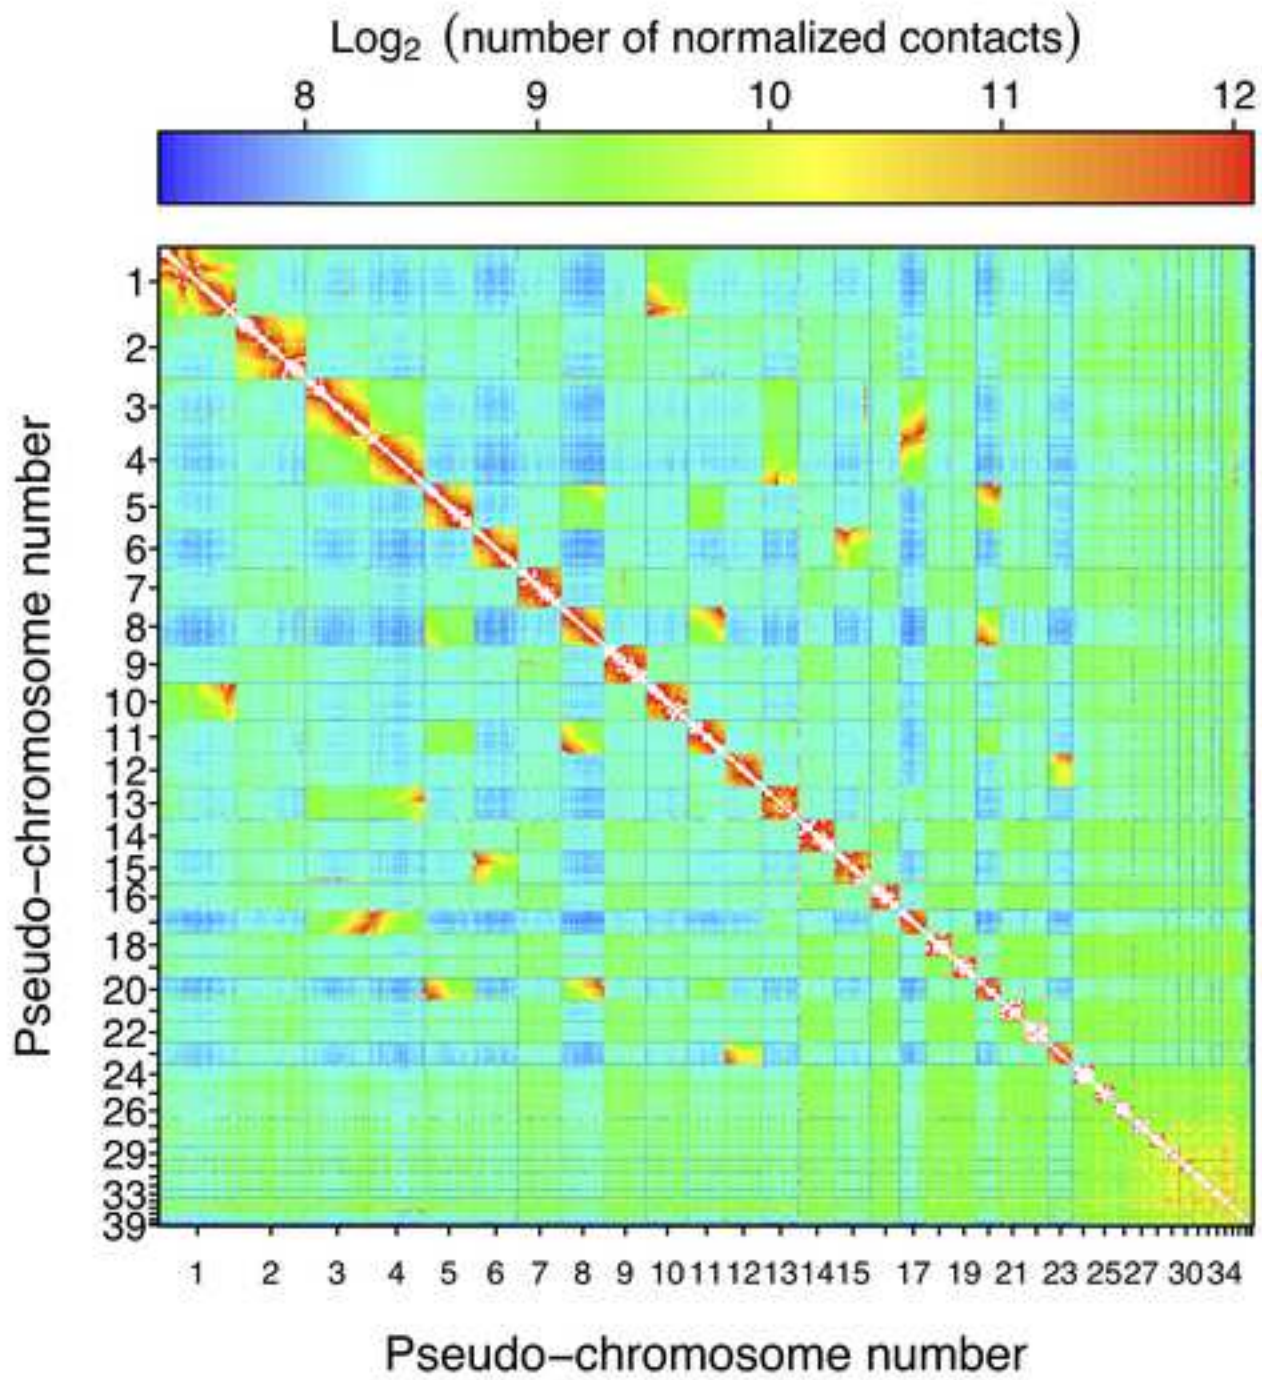

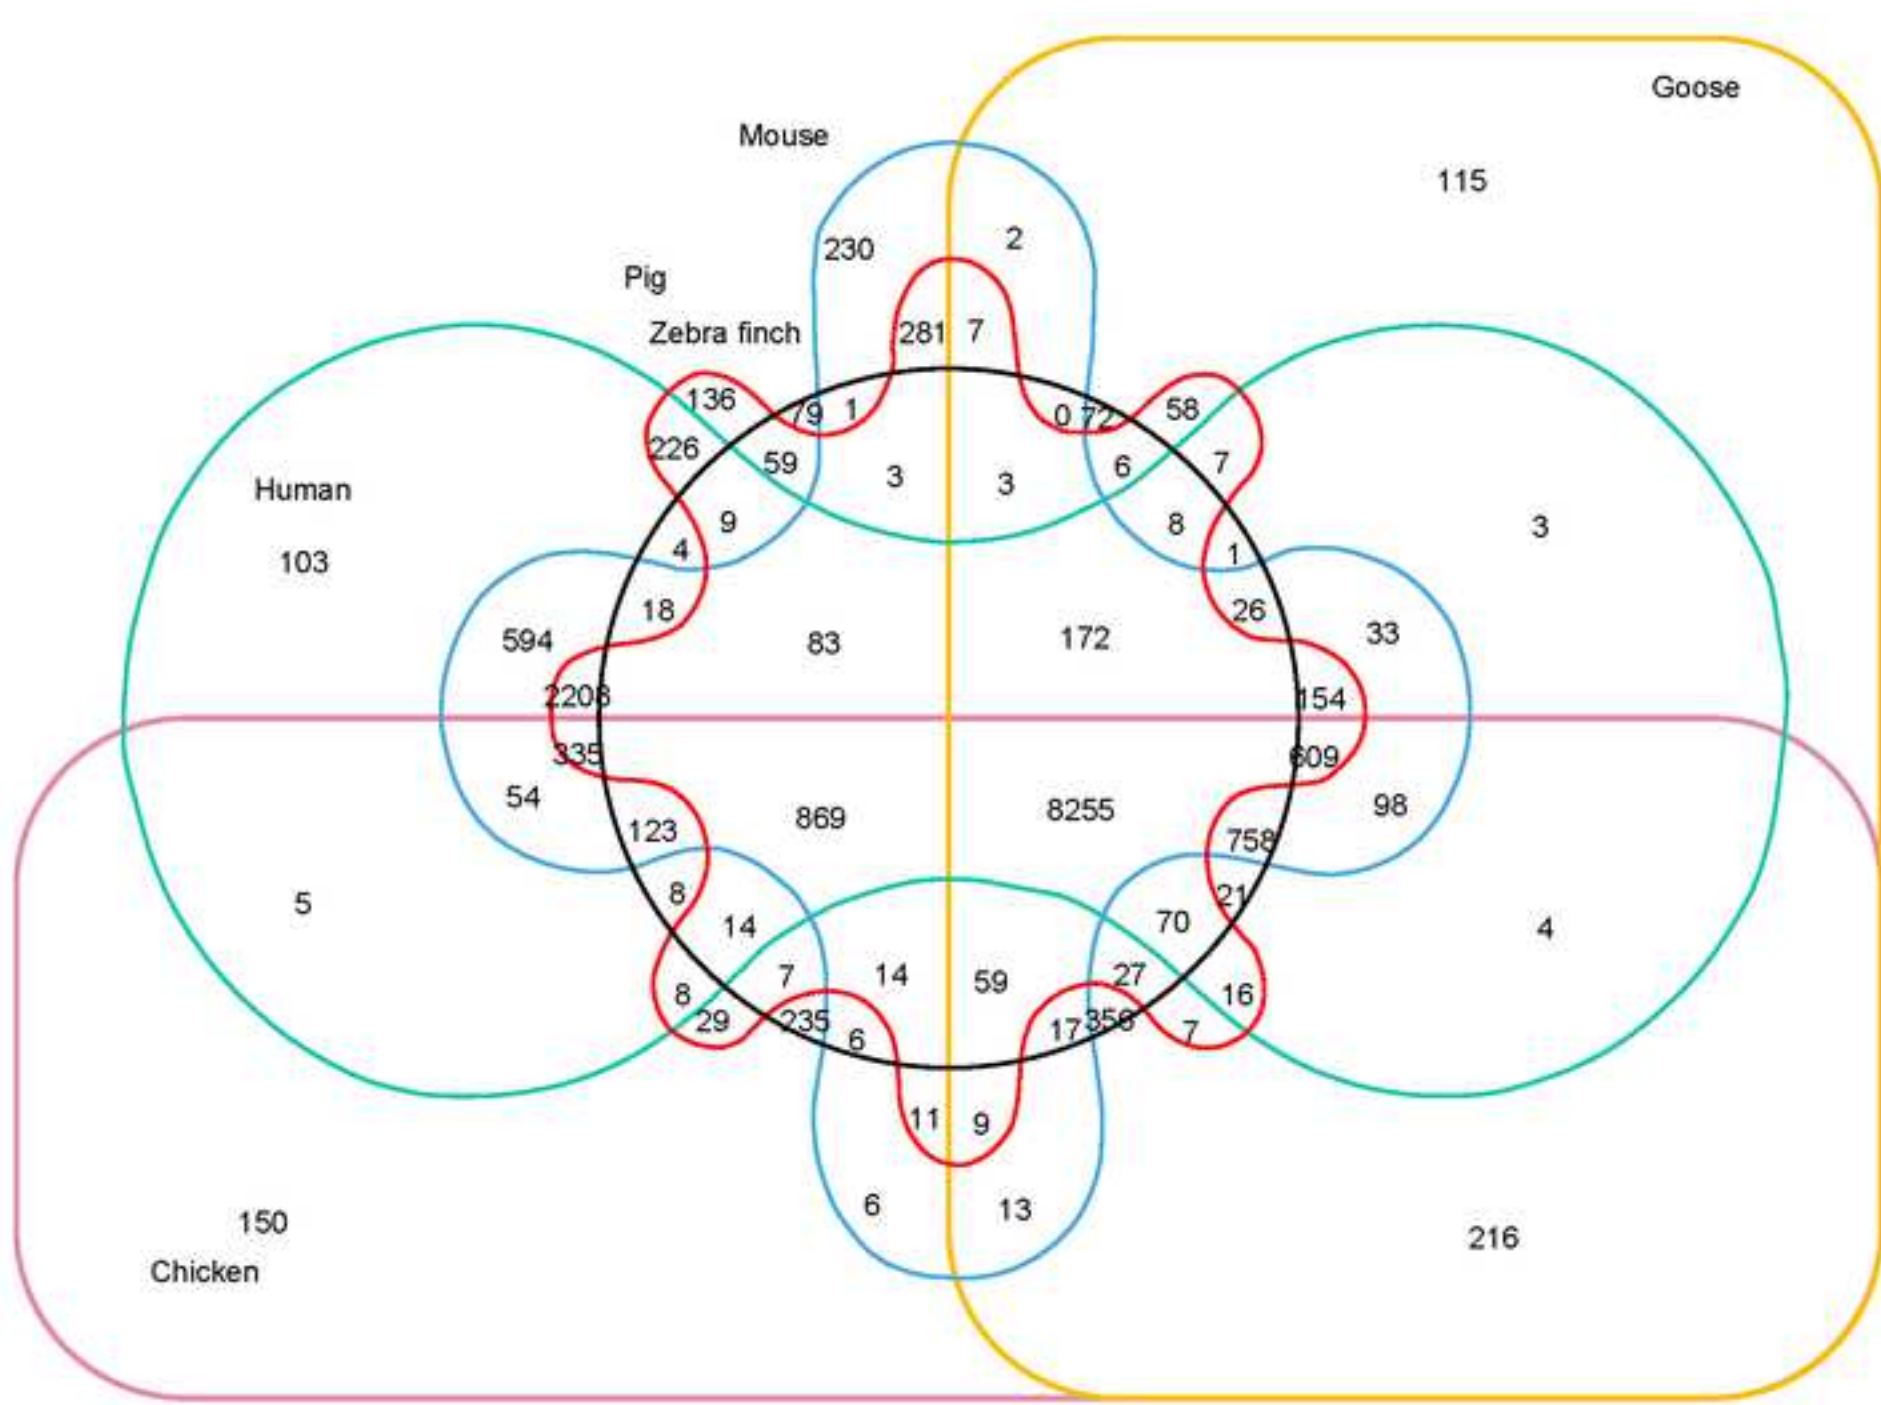

Figure S3 Divergence of time and the expansion, contraction gene families in the seventeen species

[Click here to download Figure Figure S3.jpg](#)

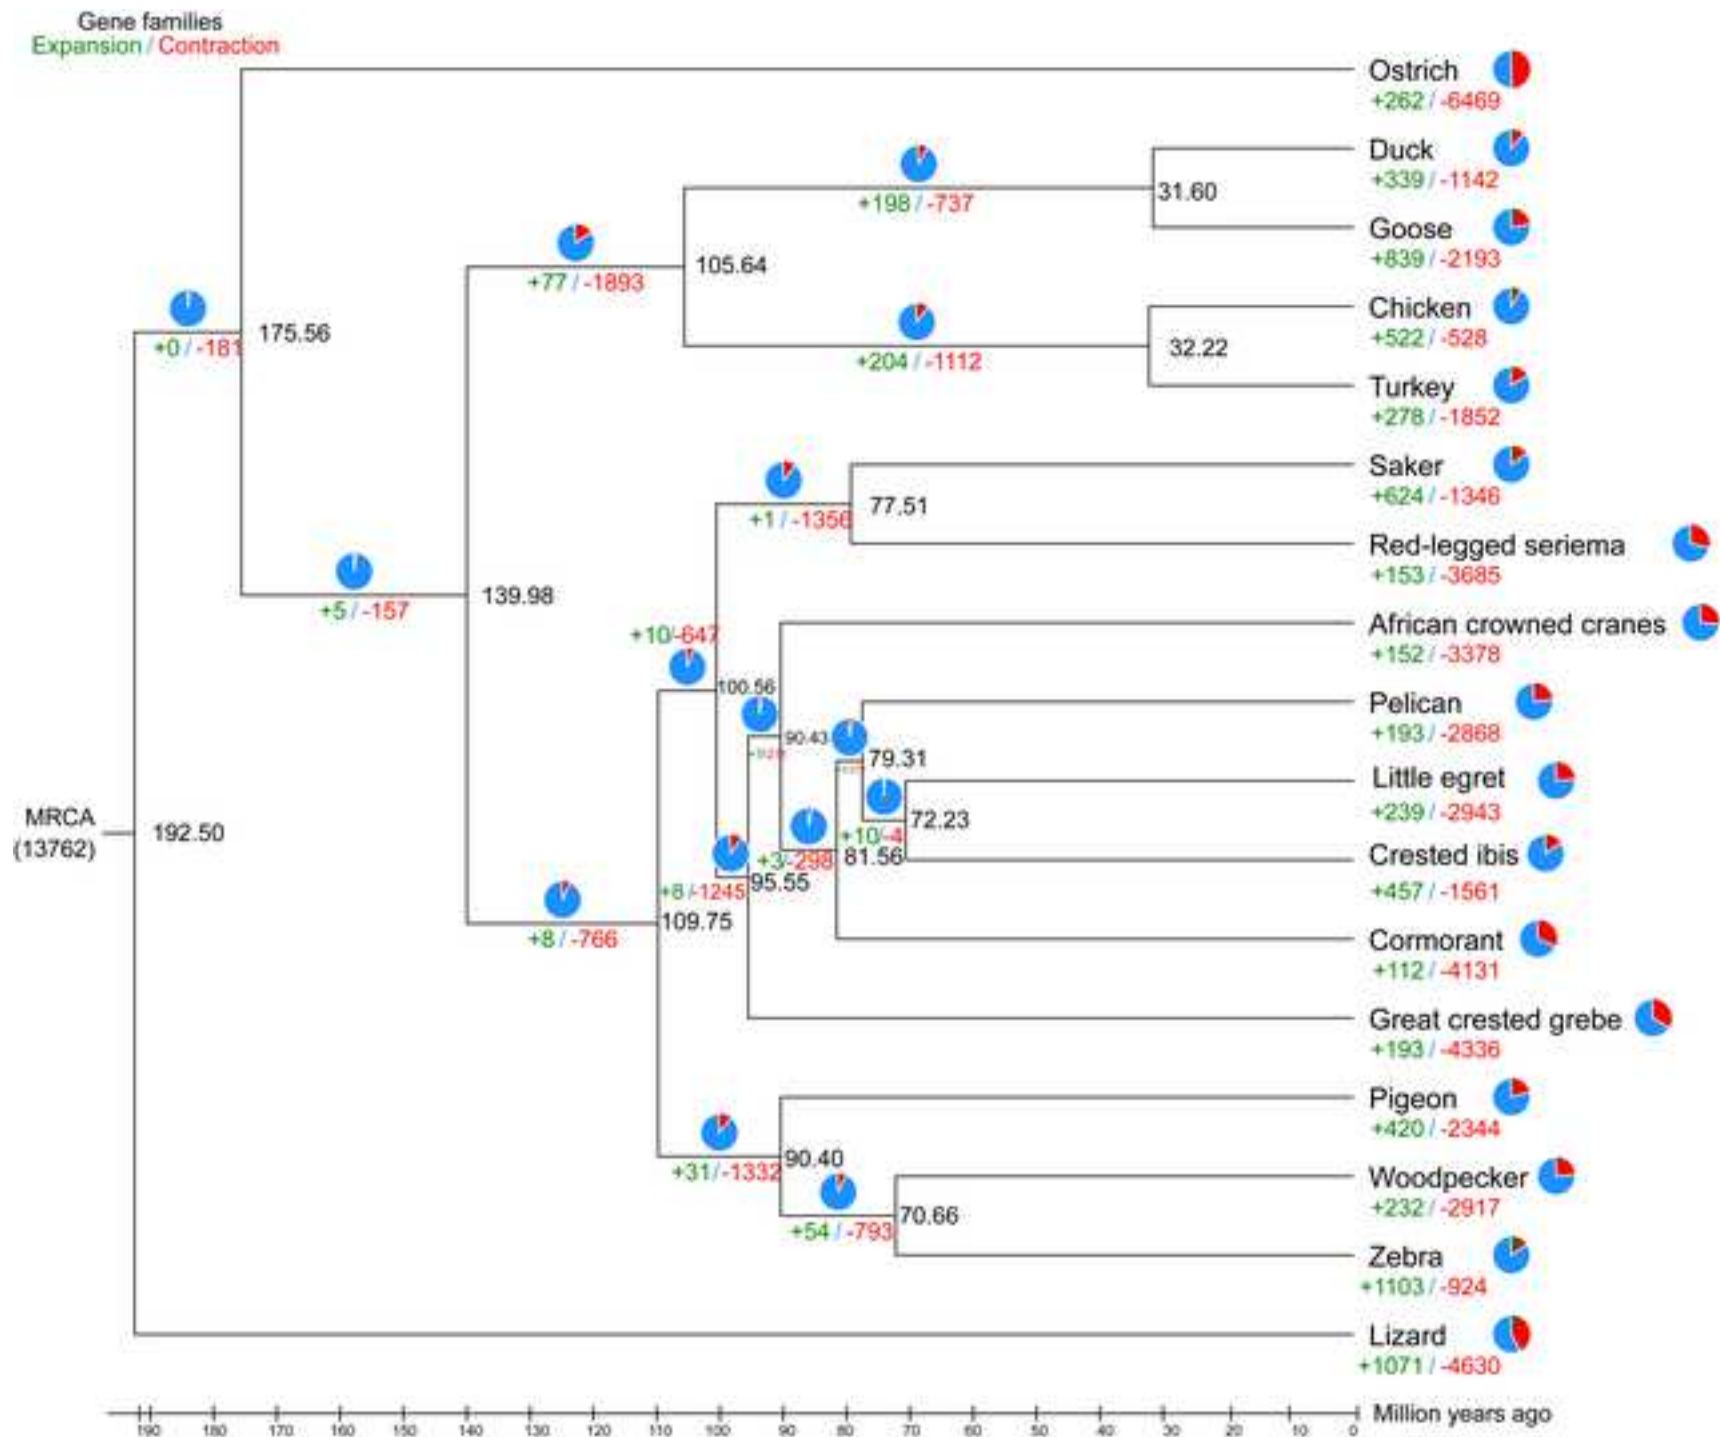

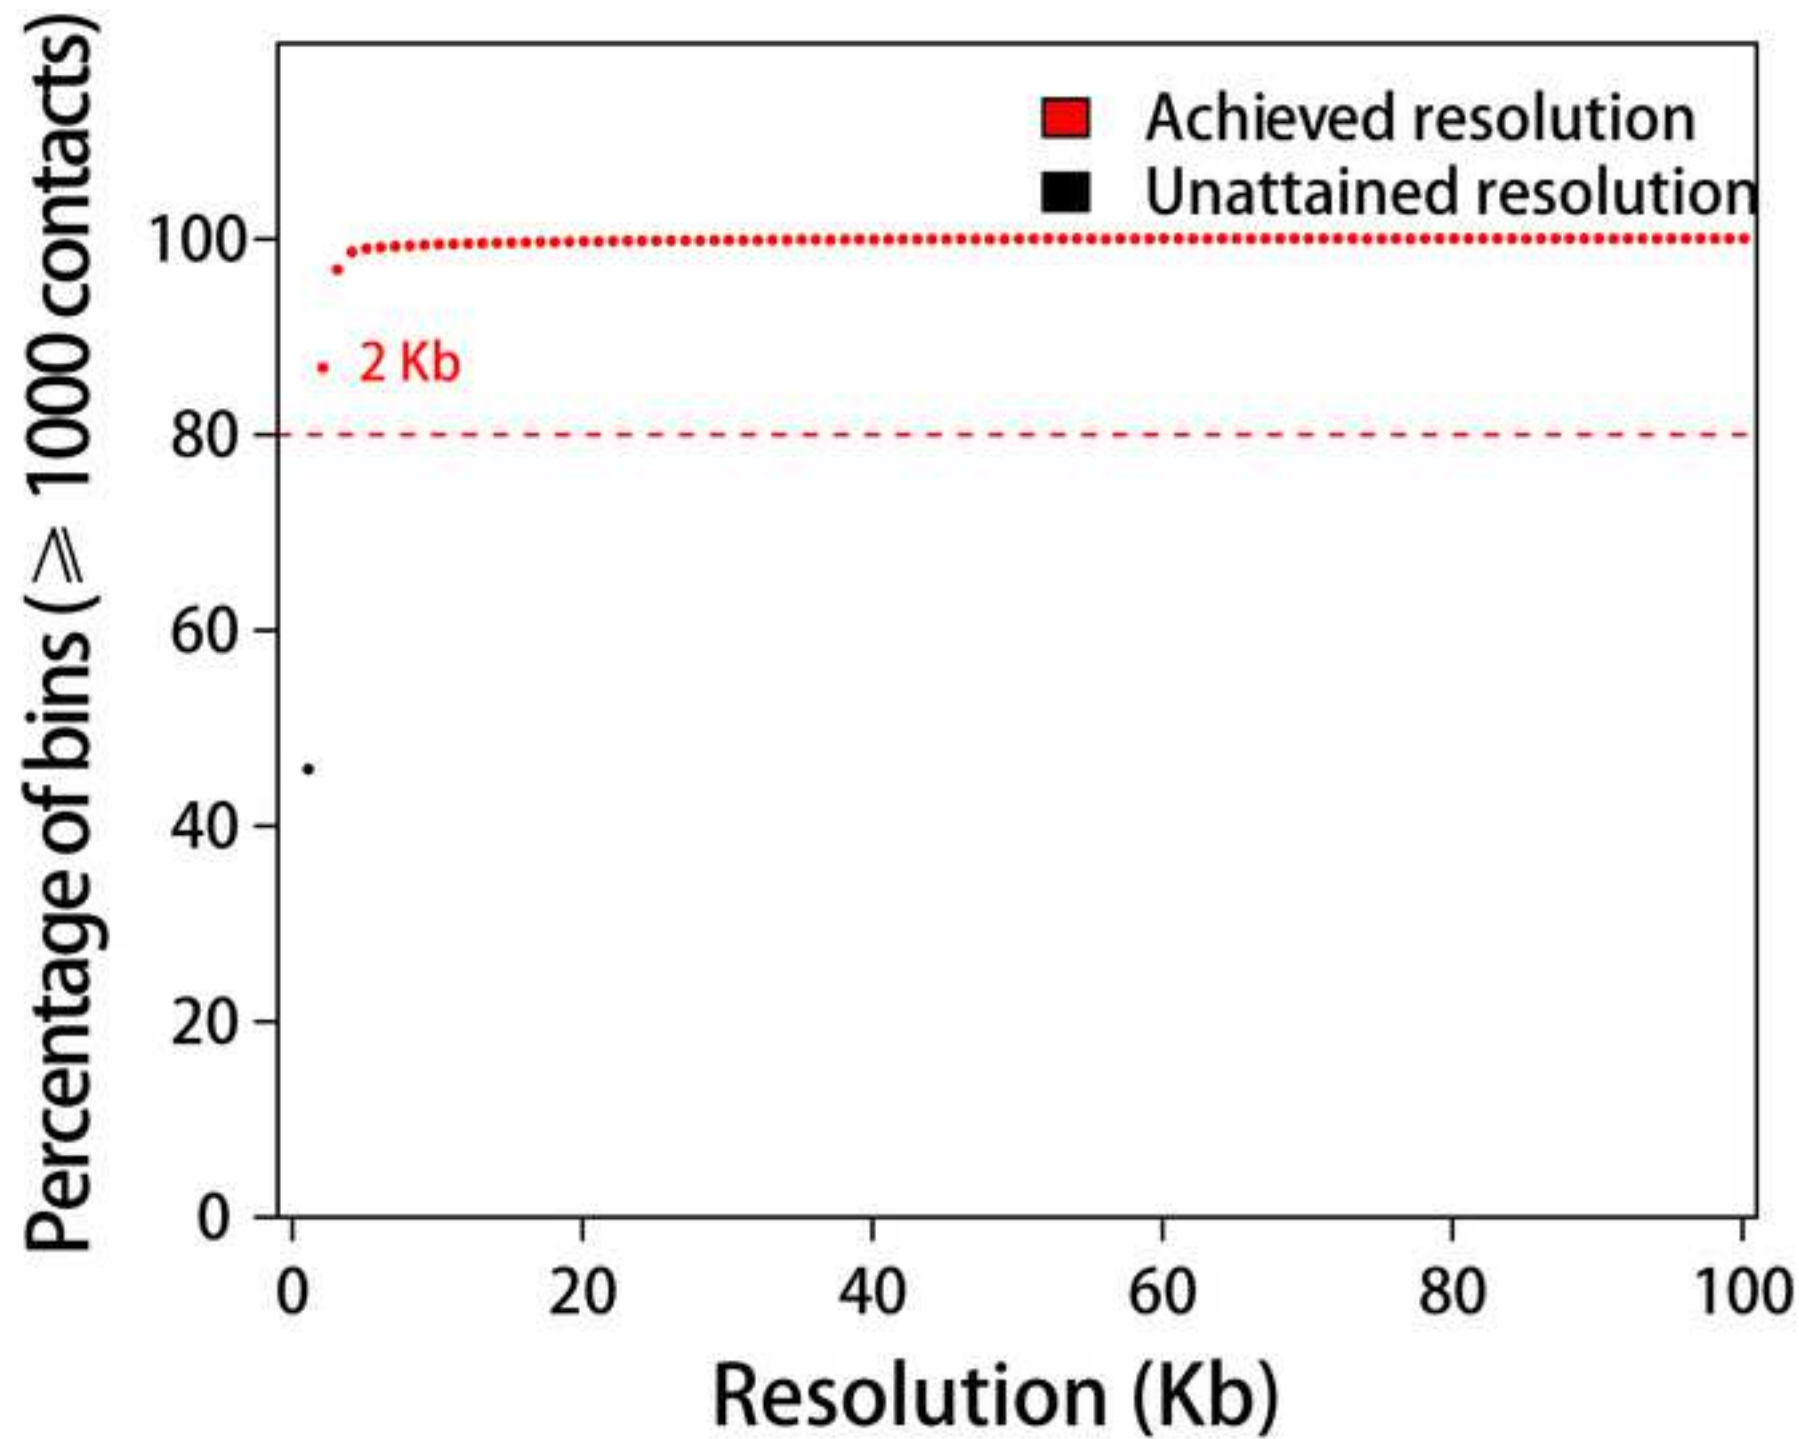



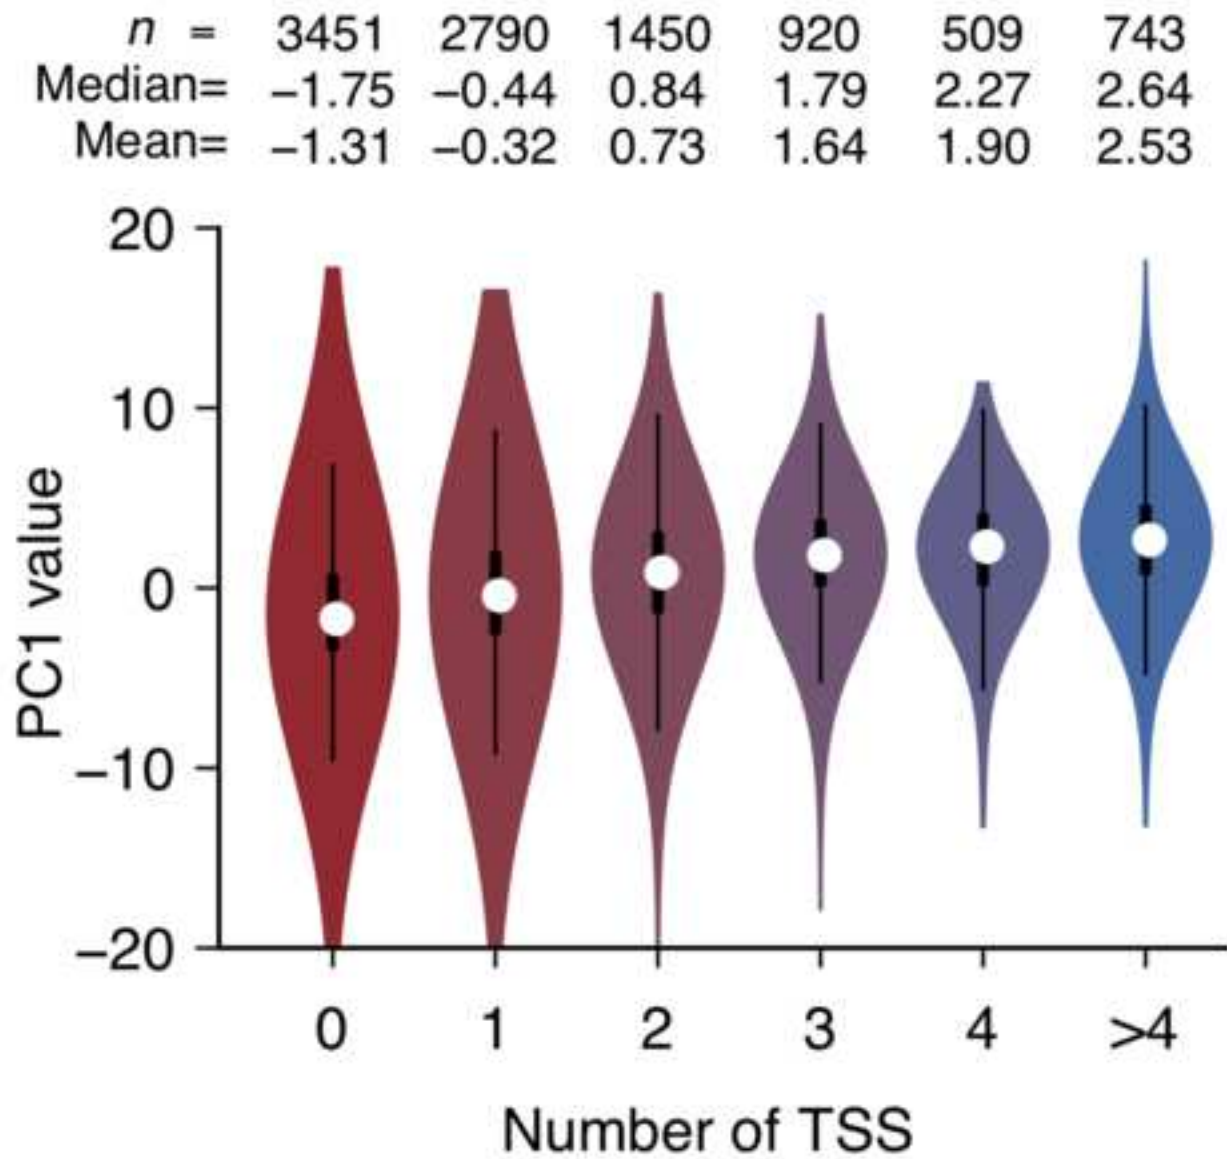

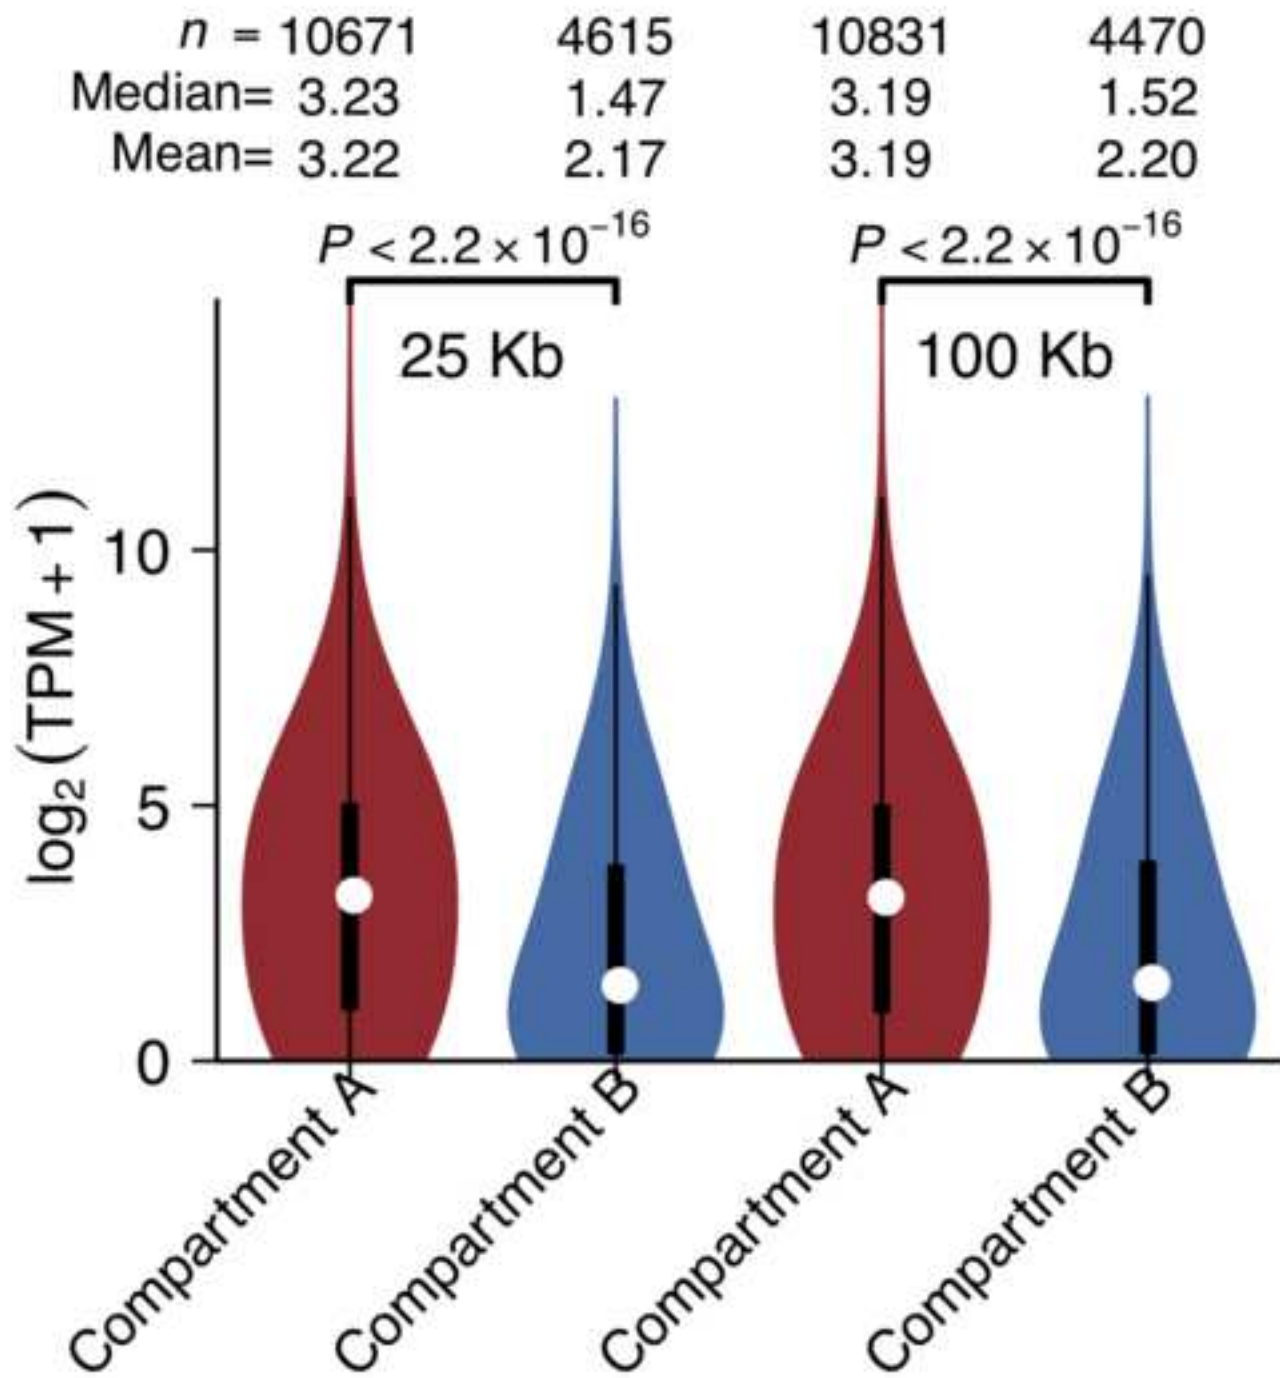

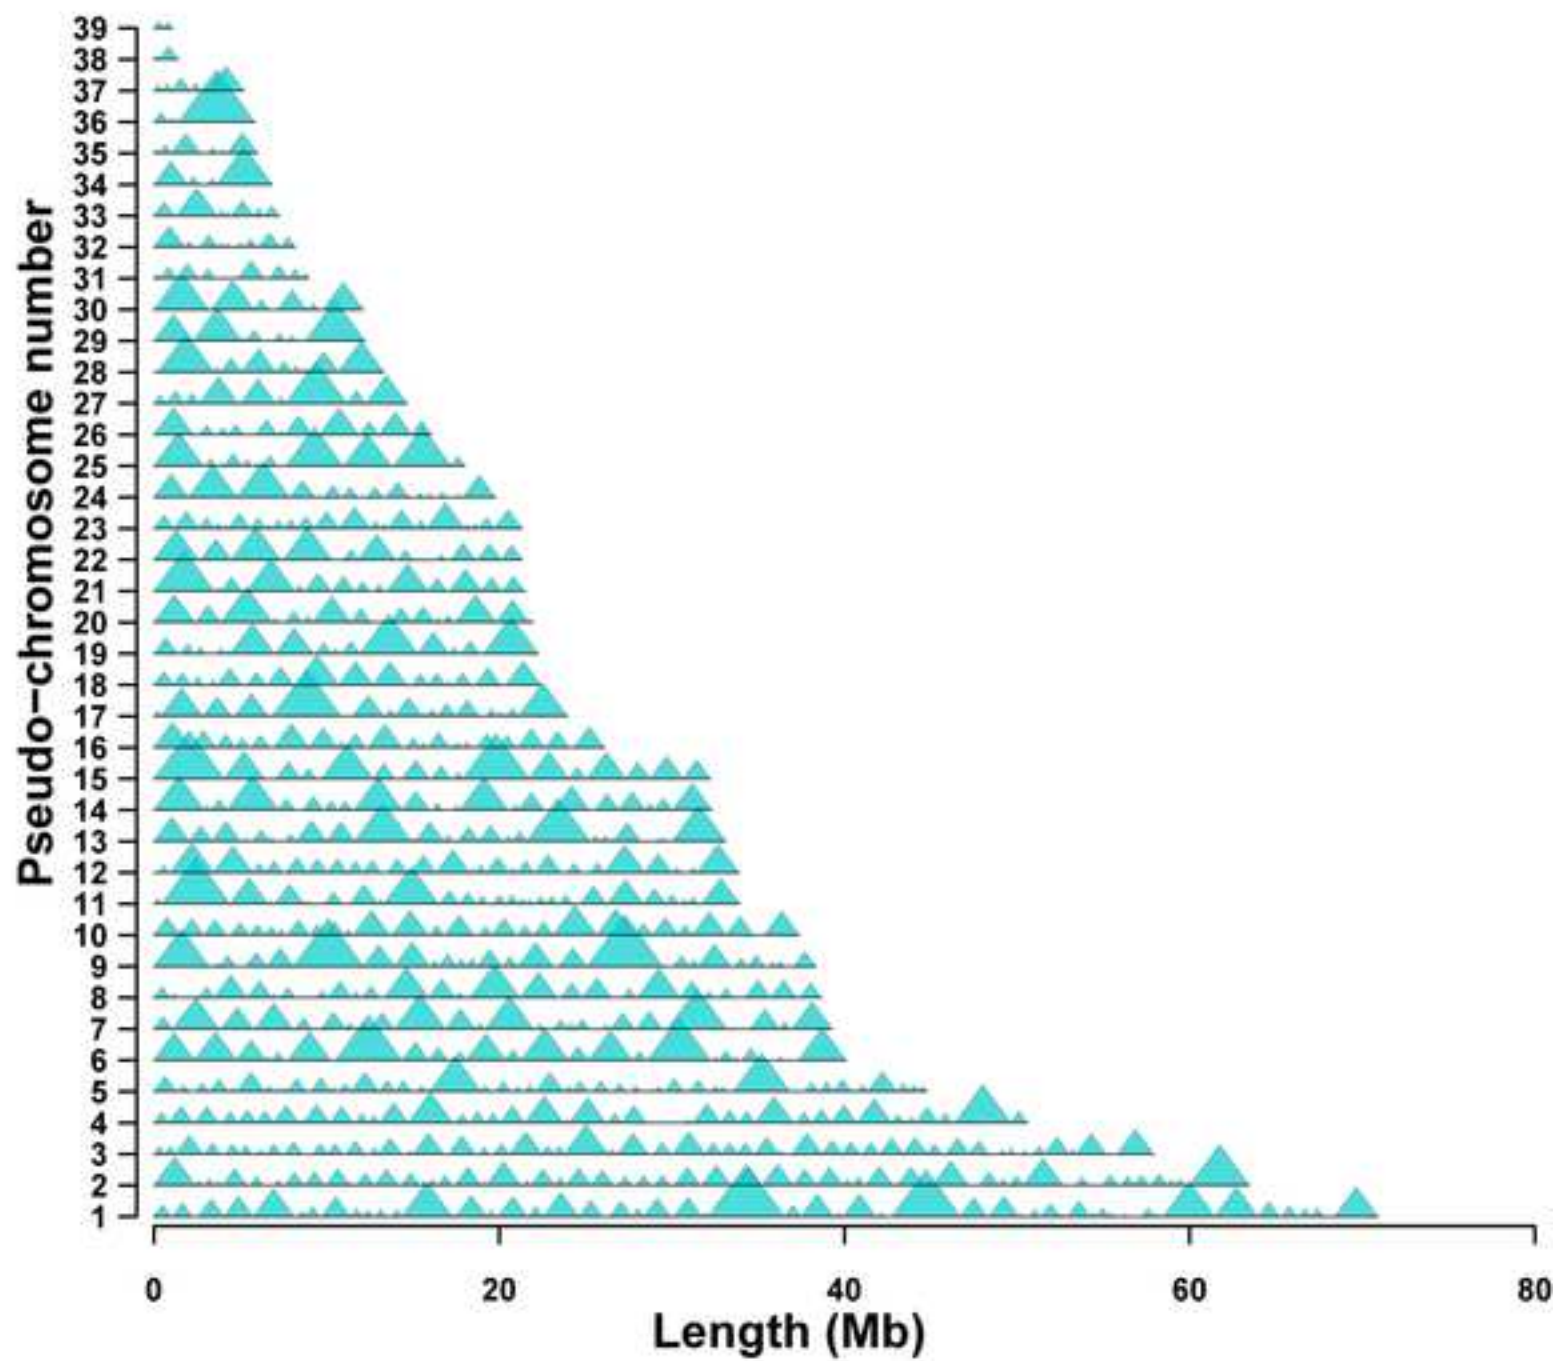

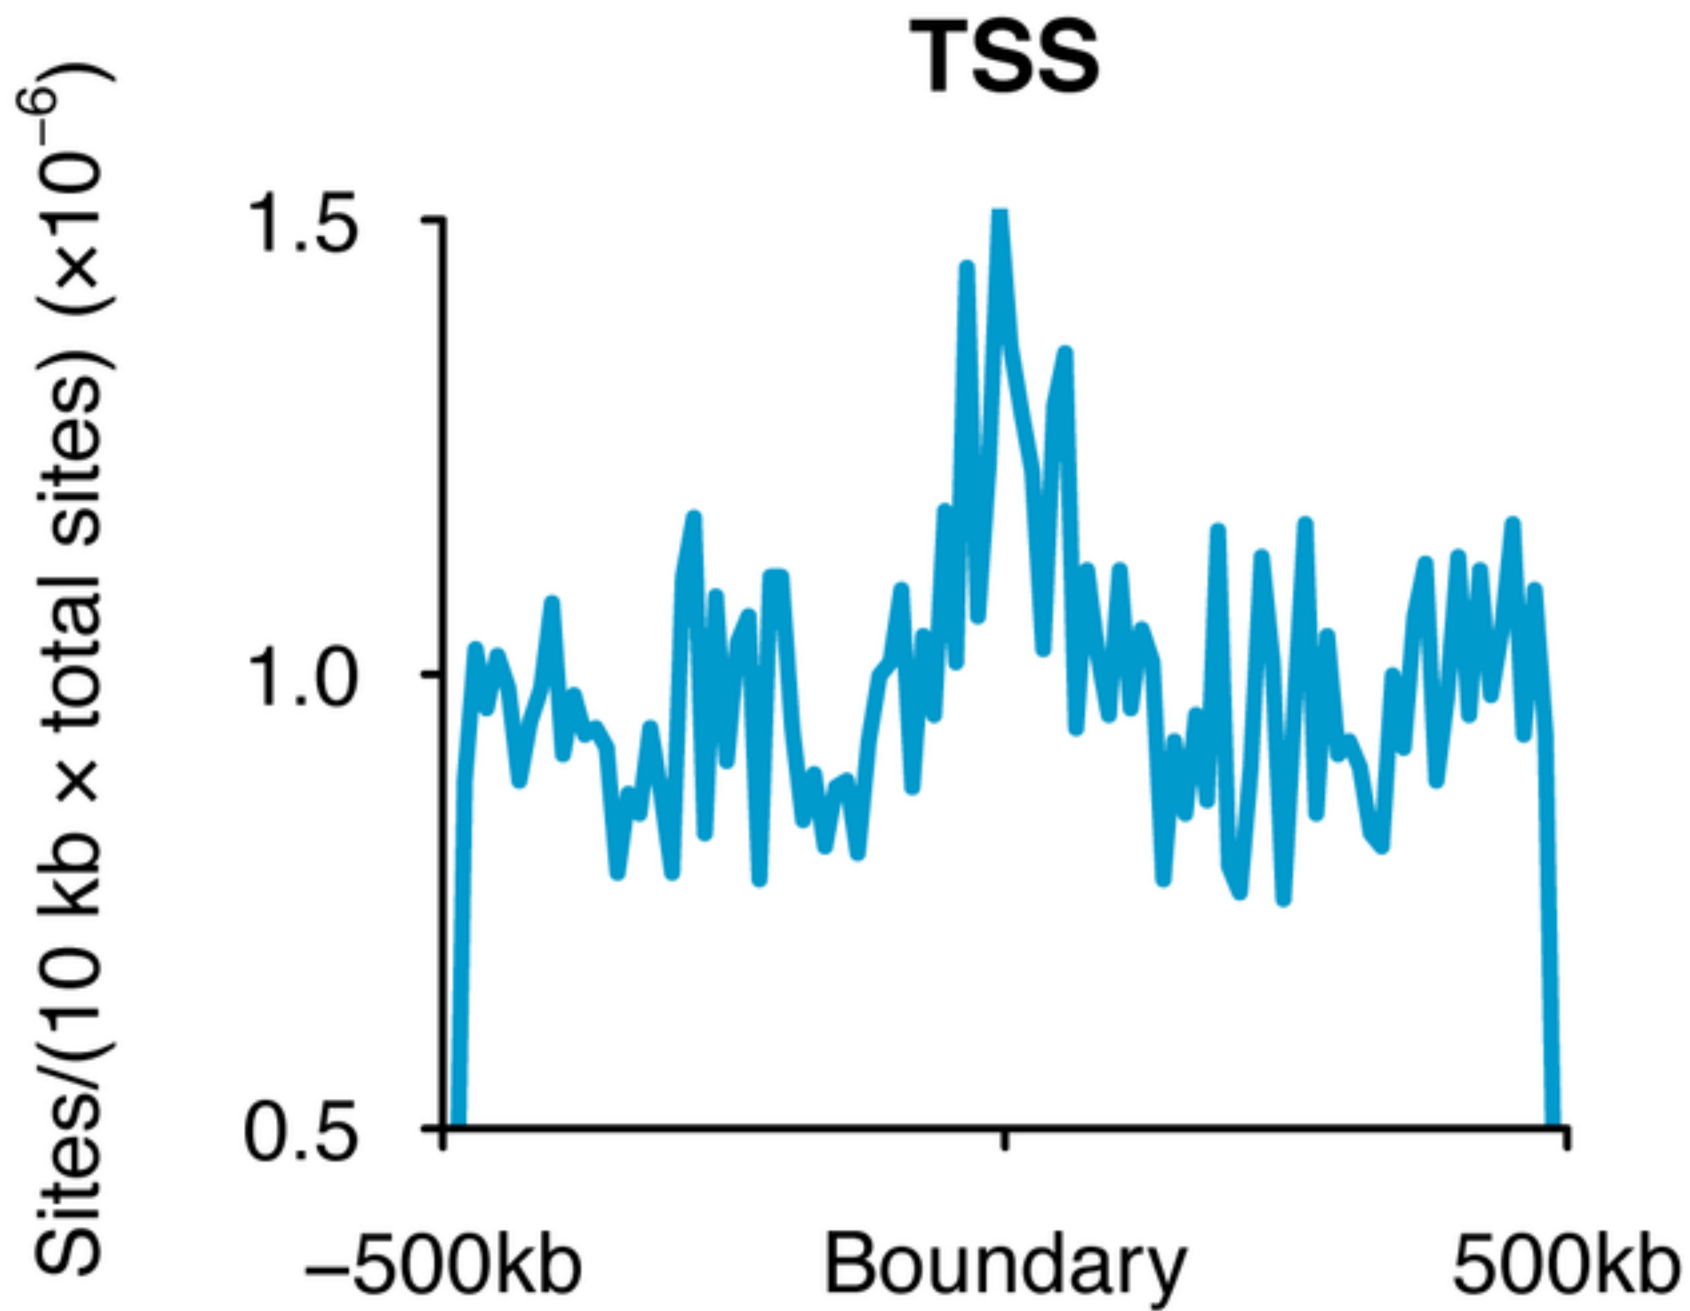

|            |       |      |      |
|------------|-------|------|------|
| <i>n</i> = | 10732 | 3678 | 3158 |
| Median=    | 2.11  | 2.77 | 3.19 |
| Mean=      | 2.54  | 2.87 | 3.22 |

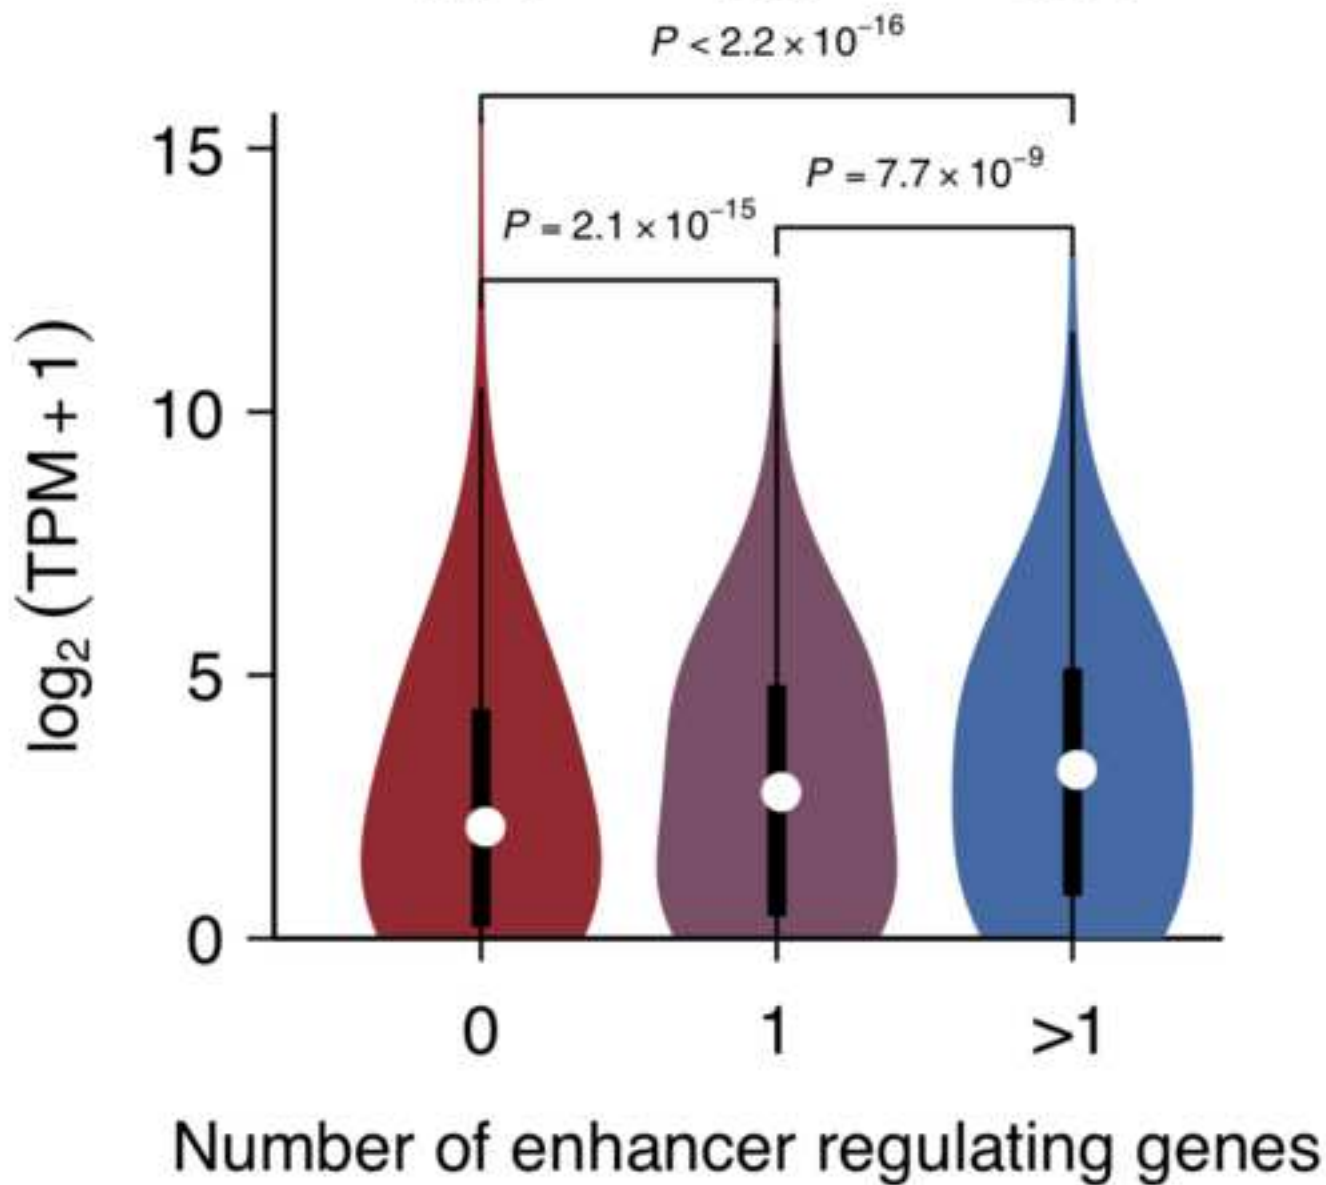

Table S1 Summary of the Pacbio initial assembly and Hi-C reads mapping used for goose genome assembly process.

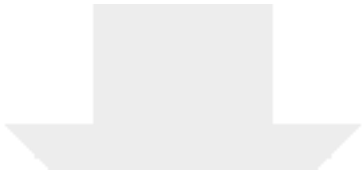

Click here to access/download  
**Supplementary Material**  
Table S1.xls



Table S2 Summary of the length of pseudo-chromosomes in  
goose genome.

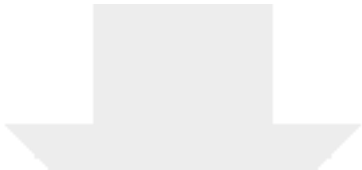

Click here to access/download  
**Supplementary Material**  
Table S2.xls



Table S3 A comparative summary of assembled repeat content in this study and previous studies.

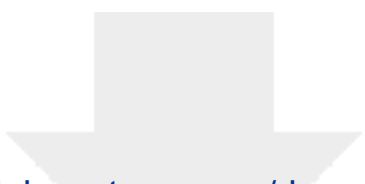

Click here to access/download  
**Supplementary Material**  
Table S3.xls





Table S4 Summary the map rates of the wild goose resequencing data.

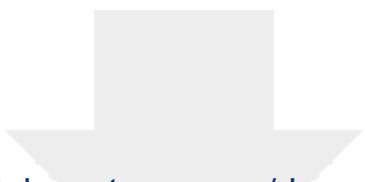

Click here to access/download  
**Supplementary Material**  
Table S4.xls



Table S5 Gene ontology (GO) enrichment analysis for the lineage-specific gene annotation in goose genome.

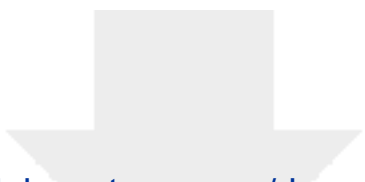

Click here to access/download  
**Supplementary Material**  
Table S5.xls



Table S6 Functional gene categories enriched for the goose genome-specific expansion gene family.

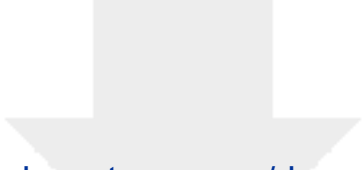

Click here to access/download  
**Supplementary Material**  
Table S6.xls



Table S7 Functional gene categories enriched for the contraction of genes family in goose genome.

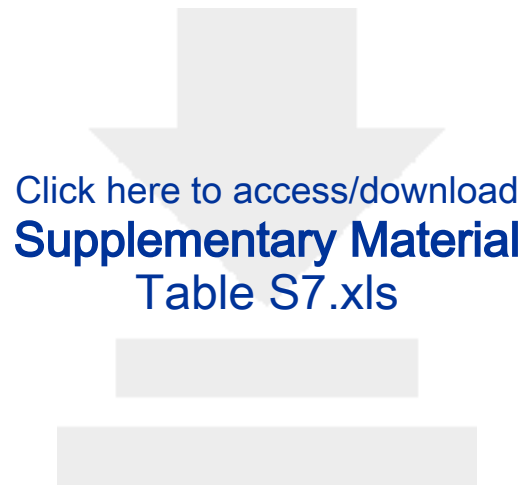

Table S8 Positively selected genes (PSGs) identified in the goose genome.



Click here to access/download  
**Supplementary Material**  
Table S8.xlsx

Table S9 The PC1 values (100 Kb) through Principal Component Analysis (PCA) and A-B index values (25 Kb).



Click here to access/download  
**Supplementary Material**  
Table S9.xlsx

Table S10 TAD in genome coordinates of our goose genome by using method of DI values.



Click here to access/download  
**Supplementary Material**  
Table S10.xlsx



Table S11 Detailed information of promoter-enhancer interactions (PEIs) identified in goose genome.



Click here to access/download  
**Supplementary Material**  
Table S11.xlsx
