# Supplementary material for: Pacific Biosciences assembly with Hi-C mapping generates an improved, chromosome-level goose genome
Source: PubMed Central journal article supplement (PMC7585555; doi:10.1093/gigascience/giaa114), 2020-10-24
Supplement: giaa114_giga-d-20-00133_revision_1.pdf [file giaa114_giga-d-20-00133_revision_1.pdf]

# GigaScience

## PacBio assembly with Hi-C mapping generates an improved, chromosome-level goose genome

--Manuscript Draft--

|                                                      |                                                                                                                                                                                                                                                                                                                                                                                                                                                                                                                                                                                                                                                                                                                                                                                                                                                                                                                                                                                                                                                                                                                                                                                                                                                                                                                                                                                                                                                                                                                                                                                                                                                                                                                                     |                   |
|------------------------------------------------------|-------------------------------------------------------------------------------------------------------------------------------------------------------------------------------------------------------------------------------------------------------------------------------------------------------------------------------------------------------------------------------------------------------------------------------------------------------------------------------------------------------------------------------------------------------------------------------------------------------------------------------------------------------------------------------------------------------------------------------------------------------------------------------------------------------------------------------------------------------------------------------------------------------------------------------------------------------------------------------------------------------------------------------------------------------------------------------------------------------------------------------------------------------------------------------------------------------------------------------------------------------------------------------------------------------------------------------------------------------------------------------------------------------------------------------------------------------------------------------------------------------------------------------------------------------------------------------------------------------------------------------------------------------------------------------------------------------------------------------------|-------------------|
| <b>Manuscript Number:</b>                            | GIGA-D-20-00133R1                                                                                                                                                                                                                                                                                                                                                                                                                                                                                                                                                                                                                                                                                                                                                                                                                                                                                                                                                                                                                                                                                                                                                                                                                                                                                                                                                                                                                                                                                                                                                                                                                                                                                                                   |                   |
| <b>Full Title:</b>                                   | PacBio assembly with Hi-C mapping generates an improved, chromosome-level goose genome                                                                                                                                                                                                                                                                                                                                                                                                                                                                                                                                                                                                                                                                                                                                                                                                                                                                                                                                                                                                                                                                                                                                                                                                                                                                                                                                                                                                                                                                                                                                                                                                                                              |                   |
| <b>Article Type:</b>                                 | Data Note                                                                                                                                                                                                                                                                                                                                                                                                                                                                                                                                                                                                                                                                                                                                                                                                                                                                                                                                                                                                                                                                                                                                                                                                                                                                                                                                                                                                                                                                                                                                                                                                                                                                                                                           |                   |
| <b>Funding Information:</b>                          | National Key R & D Program of China (2018YFD0500403)                                                                                                                                                                                                                                                                                                                                                                                                                                                                                                                                                                                                                                                                                                                                                                                                                                                                                                                                                                                                                                                                                                                                                                                                                                                                                                                                                                                                                                                                                                                                                                                                                                                                                | Prof. Mingzhou Li |
|                                                      | National Natural Science Foundation of China (U19A2036)                                                                                                                                                                                                                                                                                                                                                                                                                                                                                                                                                                                                                                                                                                                                                                                                                                                                                                                                                                                                                                                                                                                                                                                                                                                                                                                                                                                                                                                                                                                                                                                                                                                                             | Prof. Mingzhou Li |
|                                                      | National Natural Science Foundation of China (31872335)                                                                                                                                                                                                                                                                                                                                                                                                                                                                                                                                                                                                                                                                                                                                                                                                                                                                                                                                                                                                                                                                                                                                                                                                                                                                                                                                                                                                                                                                                                                                                                                                                                                                             | Not applicable    |
|                                                      | National Natural Science Foundation of China (31772576)                                                                                                                                                                                                                                                                                                                                                                                                                                                                                                                                                                                                                                                                                                                                                                                                                                                                                                                                                                                                                                                                                                                                                                                                                                                                                                                                                                                                                                                                                                                                                                                                                                                                             | Prof. Mingzhou Li |
|                                                      | National Natural Science Foundation of China (31802044)                                                                                                                                                                                                                                                                                                                                                                                                                                                                                                                                                                                                                                                                                                                                                                                                                                                                                                                                                                                                                                                                                                                                                                                                                                                                                                                                                                                                                                                                                                                                                                                                                                                                             | Dr. Yan Li        |
|                                                      | China Postdoctoral Science Foundation (2018M643514)                                                                                                                                                                                                                                                                                                                                                                                                                                                                                                                                                                                                                                                                                                                                                                                                                                                                                                                                                                                                                                                                                                                                                                                                                                                                                                                                                                                                                                                                                                                                                                                                                                                                                 | Dr. Yan Li        |
| <b>Abstract:</b>                                     | <p><b>Background:</b><br/>The domestic goose is an economically important and scientifically valuable waterfowl; however, a lack of high-quality genomic data has hindered research concerning its genome, genetics, and breeding. As domestic geese breeds derive from both the swan goose ( <i>Anser cygnoides</i> ) and the graylag goose ( <i>Anser anser</i> ), we selected a female Tianfu goose for genome sequencing. We generated a chromosome-level goose genome assembly by adopting a hybrid <i>de novo</i> assembly approach that combined PacBio single-molecule real-time sequencing, high-throughput chromatin conformation capture mapping, and Illumina short-read sequencing.</p> <p><b>Findings:</b><br/>We generated a 1.11 Gb goose genome with contig and scaffold N50 values of 1.85 Mb and 33.12 Mb, respectively. The assembly contains 39 pseudo-chromosomes (2n = 78) accounting for ca. 88.36% of the goose genome. Compared with previous goose assemblies, our assembly has more continuity, completeness, and accuracy; the annotation of core eukaryotic genes and universal single-copy orthologs has also been improved. We have identified 17,568 protein-coding genes (PCGs) and a repeat content of 8.67% (96.57 Mb) in this genome assembly. We also explored the spatial organization of chromatin and gene expression in the goose liver tissues, in terms of inter-pseudo-chromosomal interaction patterns, compartments, topologically associating domains, and promoter-enhancer interactions.</p> <p><b>Conclusions:</b><br/>We present the first chromosome-level assembly of the goose genome. This will be a valuable resource for future genetic and genomic studies on geese.</p> |                   |
| <b>Corresponding Author:</b>                         | Mingzhou Li, Ph.D.<br>Sichuan Agricultural University<br>Chengdu, Sichuan CHINA                                                                                                                                                                                                                                                                                                                                                                                                                                                                                                                                                                                                                                                                                                                                                                                                                                                                                                                                                                                                                                                                                                                                                                                                                                                                                                                                                                                                                                                                                                                                                                                                                                                     |                   |
| <b>Corresponding Author Secondary Information:</b>   |                                                                                                                                                                                                                                                                                                                                                                                                                                                                                                                                                                                                                                                                                                                                                                                                                                                                                                                                                                                                                                                                                                                                                                                                                                                                                                                                                                                                                                                                                                                                                                                                                                                                                                                                     |                   |
| <b>Corresponding Author's Institution:</b>           | Sichuan Agricultural University                                                                                                                                                                                                                                                                                                                                                                                                                                                                                                                                                                                                                                                                                                                                                                                                                                                                                                                                                                                                                                                                                                                                                                                                                                                                                                                                                                                                                                                                                                                                                                                                                                                                                                     |                   |
| <b>Corresponding Author's Secondary Institution:</b> |                                                                                                                                                                                                                                                                                                                                                                                                                                                                                                                                                                                                                                                                                                                                                                                                                                                                                                                                                                                                                                                                                                                                                                                                                                                                                                                                                                                                                                                                                                                                                                                                                                                                                                                                     |                   |
| <b>First Author:</b>                                 | Yan Li                                                                                                                                                                                                                                                                                                                                                                                                                                                                                                                                                                                                                                                                                                                                                                                                                                                                                                                                                                                                                                                                                                                                                                                                                                                                                                                                                                                                                                                                                                                                                                                                                                                                                                                              |                   |

|                                                |                                                                                                                                                                                                                                                                                                                                                                                                                                                                                                                                                                                                                                                                                                                                                                                                                                                                                                                                                                                                                                                                                                                                                                                                                                                                                                                                                                                                                                                                                                                                                                                                                                                                                                                                                                                                                                                                                                                                                                                                                                                                                                                                                                                                                                                                                                                                                                                                                                                                                                                                                                                                                                                                                                                                                                                                                                                                                                                                                                                                                                                 |
|------------------------------------------------|-------------------------------------------------------------------------------------------------------------------------------------------------------------------------------------------------------------------------------------------------------------------------------------------------------------------------------------------------------------------------------------------------------------------------------------------------------------------------------------------------------------------------------------------------------------------------------------------------------------------------------------------------------------------------------------------------------------------------------------------------------------------------------------------------------------------------------------------------------------------------------------------------------------------------------------------------------------------------------------------------------------------------------------------------------------------------------------------------------------------------------------------------------------------------------------------------------------------------------------------------------------------------------------------------------------------------------------------------------------------------------------------------------------------------------------------------------------------------------------------------------------------------------------------------------------------------------------------------------------------------------------------------------------------------------------------------------------------------------------------------------------------------------------------------------------------------------------------------------------------------------------------------------------------------------------------------------------------------------------------------------------------------------------------------------------------------------------------------------------------------------------------------------------------------------------------------------------------------------------------------------------------------------------------------------------------------------------------------------------------------------------------------------------------------------------------------------------------------------------------------------------------------------------------------------------------------------------------------------------------------------------------------------------------------------------------------------------------------------------------------------------------------------------------------------------------------------------------------------------------------------------------------------------------------------------------------------------------------------------------------------------------------------------------------|
| <b>First Author Secondary Information:</b>     |                                                                                                                                                                                                                                                                                                                                                                                                                                                                                                                                                                                                                                                                                                                                                                                                                                                                                                                                                                                                                                                                                                                                                                                                                                                                                                                                                                                                                                                                                                                                                                                                                                                                                                                                                                                                                                                                                                                                                                                                                                                                                                                                                                                                                                                                                                                                                                                                                                                                                                                                                                                                                                                                                                                                                                                                                                                                                                                                                                                                                                                 |
| <b>Order of Authors:</b>                       | <p>Yan Li</p> <p>Guangliang Gao</p> <p>Yu Lin</p> <p>Silu Hu</p> <p>Yi Luo</p> <p>Guosong Wang</p> <p>Long Jin</p> <p>Qigui Wang</p> <p>Jiwen Wang</p> <p>Qianzi Tang</p> <p>Mingzhou Li, Ph.D.</p>                                                                                                                                                                                                                                                                                                                                                                                                                                                                                                                                                                                                                                                                                                                                                                                                                                                                                                                                                                                                                                                                                                                                                                                                                                                                                                                                                                                                                                                                                                                                                                                                                                                                                                                                                                                                                                                                                                                                                                                                                                                                                                                                                                                                                                                                                                                                                                                                                                                                                                                                                                                                                                                                                                                                                                                                                                             |
| <b>Order of Authors Secondary Information:</b> |                                                                                                                                                                                                                                                                                                                                                                                                                                                                                                                                                                                                                                                                                                                                                                                                                                                                                                                                                                                                                                                                                                                                                                                                                                                                                                                                                                                                                                                                                                                                                                                                                                                                                                                                                                                                                                                                                                                                                                                                                                                                                                                                                                                                                                                                                                                                                                                                                                                                                                                                                                                                                                                                                                                                                                                                                                                                                                                                                                                                                                                 |
| <b>Response to Reviewers:</b>                  | <p>Detailed responses to Reviewers</p> <p>Below, all critiques and suggestions provided by the reviewers are cited in gray italics; our responses are in black. In red are descriptions within the responses that indicate changes in the manuscript. Moreover, all revisions in the manuscript are marked in red.</p> <hr/> <p>Reviewer 1</p> <p>This paper reports on the assembly and annotation of the Tianfu goose genome, a female hybrid of <i>A. anser</i> x <i>A. cygnoides</i>. This assembly is a significant improvement on earlier genomes, which were based on short read technologies. This assembly is a hybrid of three technologies: short reads, long reads and HiC maps.</p> <p>Comment 1:</p> <p><b>MAJOR POINTS</b></p> <p>1. The assignment of 39 chromosomes to Hi-C scaffolds is very tentative and needs to be validated. For larger scaffold you could establish homology e.g. with chicken chromosomes, which have extensive FISH/cytogenetic data at least for the macrochromosomes. The smaller scaffolds in the HiC analysis could be parts of larger chromosomes - the HiC map suggests some mis-joins. Also in other genome projects very GC-rich, repeat-rich chromosomes (such as microchromosomes) are difficult if not impossible to sequence, and are missing from the assembly. So 39 pseudo-chromosomes are found but these do not equate to the 39 physical chromosomes. This affects conclusions on chromosome number, genome completeness, gene density distribution, distribution of TADs, etc. As a reference goose genome these points need to be addressed.</p> <p>Response 1 :</p> <p>Thank you for this valuable suggestion. We recognize the importance of a reference genome that comprises accurate, physical chromosomes for future genetic and genomic studies on geese. In this study, we generated a 1.11 Gb goose genome with contig and scaffold N50 values of 1.85 Mb and 33.12 Mb, respectively (Table 1). Our assembly contains 39 pseudo-chromosomes (2n = 78), which account for 88.36% of the goose genome; it is a draft goose genome assembly rather than a complete assembly of 39 physical chromosomes. As far as we know, this genome is comparable with other chromosome-level avian genome assemblies (Table 1). (The tables and figures were accessible from Response_sup.pdf at: <a href="https://fnca1-my.sharepoint.com/:b:/g/personal/guanglianggaocq_lwh_world/EQSV0ZIBkJ9HlaxEnZFufdcBf_eOaki7d4jJkNUz9Yrwpw?e=qcLxYV">https://fnca1-my.sharepoint.com/:b:/g/personal/guanglianggaocq_lwh_world/EQSV0ZIBkJ9HlaxEnZFufdcBf_eOaki7d4jJkNUz9Yrwpw?e=qcLxYV</a>)</p> <p>We regret that our original description implied a complete genome assembly of 39 chromosomes. We have corrected this point by stating throughout the manuscript that our assembly is a chromosome-level goose genome assembly comprising 39 pseudo-chromosomes.</p> <p><b>OTHER POINTS</b></p> <p>Comment 1-1:</p> <p>1. This is a chromosome-level assembly make this clear in the text.</p> |

Response 1-1:

In accordance with Reviewer 1's suggestion, we have clarified that it is a chromosome-level assembly throughout the manuscript.

Comment 1-2:

2. The hybrid approach used here is good but this is a rapidly evolving field, and is already superseded by technology (Pacbio HiFi now so polishing using short reads not needed) and software (e.g. Lachesis no longer supported).

Response 1-2:

Thank you for this valuable insight. Certainly, de novo whole-genome assembly approaches change over time, and algorithms adapt in line with evolving sequencing technologies. This allows researchers to generate more continuous, complete, and accurate genome assemblies. To facilitate genomic, genetic, and breeding studies on the goose, we report here an improved, chromosome-level goose genome for the scientific community. We expect that our current goose assembly and annotation will be helpful for researchers in different study fields. Furthermore, we remain committed to assembling a complete and accurate goose genome sequence in the future. For this purpose, we plan to adopt the Pacbio HiFi and Pacbio isoseq technologies, and combine them with extensive FISH and cytogenetic experiments, and genetic map data.

Regarding the three software packages, LACHESIS, SALSA2, and 3D-DNA, each have advantages and limitations for de novo genome assembly. Namely, (1) while we employed the LACHESIS software to combine shotgun fragments and short jump mate-pair sequences with Hi-C data (to generate chromosome-scale de novo genome assemblies), LACHESIS has limitations when assembling polyploid genomes [1]. (2) The SALSA2 algorithm does not require that the number of chromosomes are set in advance, which improves the accuracy of scaffolds to a certain extent; however, this algorithm can introduce many clustering/sorting/orientation errors, and few parameters can be adjusted during operation [2]. (3) 3D-DNA corrects errors in the input assembly and then iteratively orients and orders contigs into a single mega-scaffold. This mega-scaffold is then broken, and chromosomal ends are identified based on a Hi-C contact map. A drawback is that the error correction function in this software has not been well applied; in the case of simulated data, the assembly error rate of 3D-DNA is 2–4 times that of SALSA2 [2].

To choose an appropriate software for our genome assembly, we randomly selected a subset of our Hi-C data and performed de novo genome assembly using SALSA2, 3D-DNA, and LACHESIS. As the quality metrics of the LACHESIS genome assemblies were the best, we performed the subsequent studies in this paper with the LACHESIS software.

Comment 1-3:

3. The phrase "high-quality" is used throughout the text but not defined - so please define. It is more likely that sequence data is generated (provide QC data on quality) and then software is used to filter out poor data, to leave high-quality data for assembly.

Response 1-3

Thank you for this useful insight. In our manuscript, the phrase "high-quality" refers to data that was filtered from three sequencing platforms and used for the genome assembly. For the short reads, we employed a Perl script written by our lab to filter the data from the Illumina platform. As a result, the Q20 and Q30 values of the whole genome sequencing data from the Illumina platform were greater than 96.44 % and 93.25 %, respectively (Table 2). (accessible from Response\_sup.pdf at: [https://fnca1-my.sharepoint.com/:b:/g/personal/guanglianggaocq\\_lwh\\_world/EQSV0ZIBk9HlaxEnZ-FufdcBf\\_eOaki7d4jJkNUz9Yrwpw?e=qcLxYV](https://fnca1-my.sharepoint.com/:b:/g/personal/guanglianggaocq_lwh_world/EQSV0ZIBk9HlaxEnZ-FufdcBf_eOaki7d4jJkNUz9Yrwpw?e=qcLxYV)). The Q20 and Q30 values of the Hi-C data used in our study were 97.86 % and 91.84 %, respectively (Table 2). These results suggest that the data used in our genome assembly were "high-quality".

Comment 1-4:

4. For all software, please provide versions and source.

Response 1-4:

Following Reviewer 1's valuable suggestion, we have added the below descriptions to the supplemental materials (see lines 2–63).

Goose genome assembly, annotation and the spatial organization of chromatin in liver tissues analysis by the following software

Goose genome were de novo assembled by the following software:

- (1) FALCON: version 3.1, parameters: length\_cutoff = 5000 length\_cutoff\_pr = 4500;
- (2) pbsmrtpipe: version smrtlink\_5.0.1, default parameters;
- (3) SSPACE-LongRead: version 1-1, default parameters;
- (4) PBjelly: version PBSuite\_15.8.24, parameters: blasr: -minMatch 8 -minPctIdentity 75 -bestn 1 -nproc 13 -noSplitSubreads;
- (5) pilon: version pilon-1.18, parameters: -Xmx400G --diploid --threads 30;
- (6) Lachesis: version-201701, parameters: RE\_SITE\_SEQ = GATC, CLUSTER\_N = 39, CLUSTER\_MIN\_RE\_SITES = 600, CLUSTER\_MAX\_LINK\_DENSITY = 3, CLUSTER\_NONINFORMATIVE\_RATIO = 0.
- (7) kallisto: version 0.44.0, parameters: -i -o --bias --rf-stranded.

Goose genome were annotated followed the software:

- (1) GCE: version1.0.0, parameters: -H 1;
- (2) SOAPdenovo: version2, k-mer size of 59;
- (3) GAPcloser: version1.12, parameters: -l 150 -p 31;
- (4) SSPACE: version3.0, default parameters;
- (5) RepeatMasker: RepeatMasker-open-4-0-6, parameters: -a -nolow -no\_is -norna -parallel 1;
- (6) RepeatModeler: RepeatModeler-open-1.0.11, parameters: -database genome -engine ncbi -pa 15;
- (7) Tandem Repeats Finder: TRF-407b, parameters: 2 7 7 80 10 50 2000 -d -h;
- (8) TBLASTN: blast-2.2.26, parameters: -e 1e-05 -F T -m 8;
- (9) GeneWise: version2.4.1, parameters: -tfor/-trev -genesf -gff;
- (10) Augustus: version3.2.3, parameters: -uniqueGenelid = true-nolnFrameStop = true-gff3 = on-genemodel = complete-strand = both;
- (11) GlimmerHMM: version3.0.1, parameters: -g -f;
- (12) SNAP: snap-2013-11-29, default parameters;
- (13) Trinity: trinityrnaseq-2.1.1, parameters: --seqType fq-CPU 20--max\_memory 200G--normalize\_reads--full\_cleanup--min\_glue 2--min\_kmer\_cov 2--KMER\_SIZE 25;
- (14) PASA: PASA\_r20140417, default parameters;
- (15) InterPro: version29.0, perl-based version4.8, default parameters;
- (16) tRNAscan-SE: tRNAscan-SE-1.3.1, default parameters;
- (17) INFERNAL: version1.1rc4 (June 2013);
- (18) BLASTp: blast-2.2.26, parameters: -p blastn -e 1e-10 -v 10000 -b 10000;
- (19) EVM: VidenceModeler-1.1.1, parameters: --segment-Size 200000--overlapSize 20000;
- (20) Tophat: tophat-2.0.13, parameters: -p 6--max-intron-length 500000 -m 2--library-type fr-unstranded;
- (21) Cufflinks: cufflinks-2.1.1, parameters: -l 500000 -p 1--library-type fr-unstranded -L CUFF;
- (22) BUSCO: version3.0.2, OrthoDBv9\_vertabrata;
- (23) BWA: bwa-0.7.8, parameters: mem -k 32 -w 10 -B 3 -O 11 -E 4 -t 10;
- (24) SAMtools: samtools-0.1.19, parameters: mpileup mpileup -m 2 -u;
- (25) RAXML: version 8.0.19, default parameters;
- (26) CAFÉ: Version 1.6, default parameters;
- (27) BLASTP: Version 2.2.26, default parameters;
- (28) PAML: Version 4.7, default parameters;

LncRNA and TUCP were annotated followed the software:

- (1) STAR: version 2.6.0c, default parameters;
- (2) Cufflinks: version 2.2.1, default parameters;
- (3) TACO: version 0.7.3, parameters: --filter-min-expr 0.1 --isoform-frac 0.1 --path-kmax 20 --max-paths 20 --filter-min-length 250 --gtf-expr-attr FPKM;
- (4) taco\_refcomp: part of TACO in version 0.7.3, parameters: -o -r -t
- (5) CPC2: version beta of CPC2, default parameters;
- (6) transeq: parts of EMBOSS in version 6.6.0, parameters: -sequence -outseq -frame 6 -clean;
- (7) kallisto: version 0.44.0, parameters: -i -o --bias --rf-stranded.

Hi-C data analysis by the following software:

- (1) Juicer: version 1.8.9, parameters: -C 8000000 -s Mbol -p goose.chromosome.sizes -z goose.fa -y goose.Mbol.fragment.txt -n 10G;
- (2) Hi-C Domain Caller, pipeline to call domains from Hi-C experiments: <http://chromosome.sdsc.edu/mouse/hi-c/download.html>;
- (3) PSYCHIC: parameters, res: 25000, win: 2000000, chrname: chr\*, chrsize: chr\*.size, output\_prefix: goose.chr\*.25000, output\_dir: output\_directory, input\_matrix:

goose.chr\*.25000.normalized.matrix, gene\_file: goose.gene.psychic.bed,  
skip\_hierarchy: FALSE.

Comment 1-5:

5. LINE 84: k-mer distribution analysis used to estimate genome size - provide reference, software, method - also mention other QC estimates (repeats, polyploidy etc).

Response 1-5:

Thank you for this useful comment. To estimate genome size, repeat regions, heterozygosity, and polyploidy prior to assembling the goose genome, we employed survey software based on K-mer (k = 17) frequency distributions. This predicted the genome size, repeat ratio, and heterozygosity to be 1277.1 Mb, 39.8%, and 0.4%, respectively. In the K-mer analysis, the goose data demonstrated a distribution typical of a diploid genome (Figure 1), (accessible from Response\_sup.pdf at: [https://fnca1-my.sharepoint.com/:b/g/personal/guanglianggaocq\\_lwh\\_world/EQSV0ZIBk9HlaxEnZFufdcBf\\_eOaki7d4jJkNUz9Yrwpw?e=qcLxYV](https://fnca1-my.sharepoint.com/:b/g/personal/guanglianggaocq_lwh_world/EQSV0ZIBk9HlaxEnZFufdcBf_eOaki7d4jJkNUz9Yrwpw?e=qcLxYV)), showing only a single major peak—which could be used to estimate the genome size. In addition, the first minor peak represents the level of heterozygosity and the second minor peak represents the level of repeat sequence [3].

Comment 1-6:

6. LINE 91: Lachesis old software no longer supported - why not used SALSA2 or 3D-DNA?

Response 1-6:

Thank you for raising this important point. Please see Response 1-2 for a discussion of this issue.

Comment 1-7:

7. Figure S1: Hi-C map suggests lots of mis-joins, have you checked and manually corrected?

Response 1-7:

Thank you for this valuable comment. In accordance with this point, we also identified mis-joins in the Hi-C map, which suggests that these regions of the genome might be repetitive, GC-rich, or contain structural variation. As mentioned above, we are committed to assembling a complete and accurate goose genome sequence, and in future work aim to focus on these “mis-joins” using the latest technologies and corresponding assembly algorithms.

Comment 1-8:

8. LINES 109-111, again used the term "high-quality" for a mix of genomes, Human, Mouse, Chicken probably but duck, turkey and zebra finch are draft and not high-quality genomes.

Response 1-8:

Thank you for this insight. We have changed “high-quality” to “chromosome-level” in line 109. As described in Table 1, while the contig N50 values of zebra finch, duck, and turkey are 12.0 Mb, 36.80 Kb, and 27 Kb, respectively, these genomes were assembled into chromosome-level assemblies with the aid of other technologies, such as RH mapping and FISH (Table 1).

Comment 1-9:

9. LINES 114-117, pooled RNAseq used, so how can you quantify gene expression later in paper? Needs deconvolution of pooled samples - was this done? For annotation Pacbio isoseq would be better.

Response 1-9:

RNA-seq prediction is a commonly used method for improving genome annotation, correcting predicted gene structures, detecting new alternative splicing isoforms, and discovering new genes and transcripts. In this updated manuscript, we used data from the pooled RNA-seq analysis (abdominal fat, brain, duodenum, heart, liver, lung, muscular stomach, ovary, pancreas, pectoral muscle, and spleen) only for the annotation of the goose genome and not for gene expression quantification or for the spatial analysis of chromatin organization. Accordingly, we did not perform a deconvolution analysis of the pooled RNA-seq sample.

Nevertheless, we sincerely thank Reviewer 1 for this reminder on the correct usage of pooled RNA-seq data. We have now realized that our pooled RNA-seq data were

inaccurately used to explore the spatial organization of chromatin in goose liver tissue. To address this, we downloaded three RNA-seq datasets from liver tissues (Accession numbers: GSM3374538, GSM3374539, GSM3374540), which had been generated from the same goose strain used in our study [4]. We then quantified gene expression in these three samples and used these results to update all the content related to gene expression in our study, in terms of compartments and promoter-enhancer interactions. We have revised the main text and Figures S7–S11 and Figure 2 accordingly. Regarding Pacbio, we also thank Reviewer 1 for raising this point. Certainly, the long reads from the Pacbio isoseq platform could better annotate complete transcripts in genomes. We aim to adopt this method, and other newly developed methods, when we update the quality of the goose genome assembly or annotation in future work.

Comment 1-10:

10. Prediction of lncRNAs from assembly of short read RNA-seq is known to be poor, so LINEs 121-124, where 3,287 lncRNAs are predicted needs to be taken with caution.

Response 1-10:

Thank you for this valuable suggestion. We agree that longer reads from PacBio and ONT offer advantages for resolving complex features in transcriptomes when compared to short read RNA-seq. For example, read length is the major advantage of Iso-Seq cDNA transcript sequencing and Oxford Nanopore direct RNA-seq, which can both capture entire transcripts.

Compared with mRNAs, which can be annotated by a combination of ab initio and homologous assembly approaches, lncRNAs are not conserved among species. lncRNAs can thus only be identified by transcript data, without the aid of homology. Long reads can be helpful for the identification and annotation of lncRNAs, and in future work, we will adopt this strategy. In this study, we identified lncRNAs by analyzing the transcript data from short read RNA-seq only, and we have clarified this point in lines 124–127 of the main text.

Comment 1-11:

11. LINE 160, goose and duck diverged 32 Mya, how does this estimate compare with other data sources?

Response 1-11:

Thank you for this important comment. In this study, we first downloaded the reported divergence times between each pair of species (e.g. chicken and turkey) from the TimeTree website (<http://www.timetree.org/>). These divergence times are estimated on the basis of single-copy gene families via a Bayesian algorithm called mcmctree, within the software "PAML (<http://abacus.gene.ucl.ac.uk/software/paml.html>)". We also used well-established divergence times to further adjust the estimated divergence times of other species and improve the accuracy of our results. The divergence times predicted in our study were consistent with two previous reports: 20.8 (12.9-32.7) Mya in Lu et al. [5]; and 30.0 (21.4-38.6) Mya in Gao et al. [6].

Comment 1-12:

12. sections (b-d) interesting predictions from phylogenetic analyses, but all speculation, there is no other data provided to back up these predictions.

Response 1-12:

Thank you for raising this point. The purpose of our article was to supply a valuable resource for future genetic and genomic studies on geese. Accordingly, we endeavored to explore the general characteristics of the goose genome by performing common general analyses—such as the expansion and contraction of gene families, and the identification of genes under positive selection. In the future, experiments on gene function will help to resolve the speculations and predictions we have presented here. We have revised the main text in lines 171, 191-192 and 198–211 to address this issue.

Comment 1-13:

13. LINE 192, PAML Codeml analysis is crude, and does not correct for multiple testing, with 17K genes tested there is a high false positive rate, was there any correction for multiple testing, if not please correct.

Response 1-13:

Thank you for this valuable comment. In our work, only single-copy genes ( $n = 2389$ ) were used for the identification of genes under positive selection. We did not use all 17K genes. After we calculated the p-value for each of the candidate positively



selected genes using PAML, we further adjusted the p-values (e.g. using the Bonferroni method, a method for multiple testing) to reduce false-positive results.

Comment 1-14:

14. LINE 202, the TAD analysis is restricted to liver tissue.

Response 1-14:

Thank you for raising this point. We explored the spatial organization of chromatin and gene expression in goose liver tissue only, with regard to topologically associating domains (TAD). TADs were largely invariable across tissues or species. We have clarified this point in lines 29, 213, 224, and 229.

Comment 1-15:

15. LINES 203-204, macs and mics form sub-domains in the nucleus. Figure 4 needs more explanation, poor figure.

Response 1-15:

We have replotted Figure 4 (named Figure 2 in revised manuscript) and increased the resolution of this figure. We have also added additional explanation and changed the figure legend as follows: "Dendrogram of inter-pseudo-chromosome interaction patterns generated by the average linkage algorithm. Heatmap shows the inter-pseudo-chromosome interaction probability, as generated by calculating the observed/expected contact frequencies for chromosome pair *i, j*. This is overlaid on a histogram showing pseudo-chromosome length, number of protein-coding genes, and GC percentage".

Comment 1-16:

16. LINE 205, define compartments A and B, how are these defined in Hi-C data?

Response 1-16:

Thank you for this valuable query. We have now added an explanation of the methods used for identifying compartments A and B, as well as the methods for how the spatial organization of chromatin and gene expression were explored in the goose liver tissues (see lines 64–92 in the supplemental materials). These methods relate to inter-pseudo-chromosomal interaction patterns, topologically associating domains, promoter-enhancer interactions, and gene expression quantification.

Comment 1-17:

17. LINE 206, how were TSS (transcription start sites, not defined in the set of abbreviations, please add) defined? I assume based on the pooled short read RNA-seq data. If correct, this is a poor data set, since the assembly of transcripts based on short read data only defines the most 5' RNA sequenced. So misses any internal TSS, does not correct for degraded RNA, etc.

Response 1-17:

Thank you for this comment. We agree that basing the definition of TSS sites on short read data would be inaccurate. We apologize for the ambiguous TSS-related description in our manuscript. We have changed the description in line 221 to 223: "the number of protein-coding genes (PCGs) in each 100-Kb bin with at least 50% percentage overlapped with a gene was counted. The number of PCGs was significantly correlated with PC1 values".

Comment 1-18:

18. LINE 213, gene expression levels based on pooled RNAseq data is a very poor dataset, should deconvolute or at least have a high-quality liver RNA set.

Response 1-18:

As described above (see Response 1-9), to address this issue we downloaded three additional RNA-seq datasets that were restricted to liver tissue (Accession numbers: GSM3374538, GSM3374539, GSM3374540). These datasets derive from the same goose strain as used in our study, and on the basis of a new analysis of these data we have updated all the sections of our manuscript related to gene expression. Specifically, we have changed the following description in lines 223–225: "the transcripts per kilobase millions (TPMs) of PCGs located in A compartments were significantly higher than those in B compartments", to: "the transcripts per kilobase millions (TPMs) of PCGs located in A compartments were consistently higher than PCGs in B compartments in three liver tissues". We have also changed lines 229–230 from: "found that gene expression levels positively correlated with the number of PEIs", to: "found that gene expression levels positively correlated with the number of

associated enhancers in all three liver tissues".

#### Reviewer 2

The manuscript describes a highly contiguous genome assembly of the goose genome and provides a significant improvement of the assembly of this bird. The results are described very clearly, and the data has been made publicly available. The analyses done are rather straightforward, and much more could have done with the interesting data generated in this study, which to me seems a missed opportunity.

The authors decide to sequence an F1 animal that is a cross between *A. anser* and *A. cygnoides*. I wonder why the authors did not use Illumina sequencing to sequence the genome of the two parents. This would have allowed the generation of two haplotype specific assemblies and the Comparison between the genomes of these two different sub-species. Also, no indication is given for the number of variants seen in this bird, which would also have provided a good indication of the sequence divergence between these two sub-species. Finally, the realignment of the short-read Illumina sequences, provides a way to estimate the number of sequence errors still present in the final assembly (seen as homozygous SNPs and indels).

#### Response 2 :

We apologize, it is apparent that our description of the Tianfu goose used for genome assembly in this study was not clear. Domesticated geese derive from the swan goose (*Anser cygnoides*) and the graylag goose (*Anser anser*). The Tianfu goose is a recognized breed that has originated from crosses between the domestic Landes goose (*A. cygnoides*) and the Sichuan white goose (*A. anser*), rather than the F1 animal crossed between *A. anser* and *A. cygnoides*. The Tianfu goose is a developed breed with many outstanding characteristics, such as excellent egg-laying performance, a fast growth rate, and strong adaptability. These characteristics are why we selected the Tianfu goose for this study.

Until now, a high-quality reference goose genome has not been available. To provide a valuable resource for future genetic and genomic studies on geese, and facilitate related research fields, our manuscript presents the first chromosome-level assembly of the goose genome. With reference to human and mouse research, in future studies we also aim to perform haplotype-resolved genome assemblies of F1 geese and parent animals, and compare differences between breeds.

Regarding the estimation of sequence errors, after we obtained our final goose assembly, we realigned the short read Illumina sequences with BWA software, and called SNPs and InDels using GATK software. As can be seen in Table 3, the proportions of homologous SNPs and InDels identified (which often reflect assembly errors) were extremely low, which indicates that our final assembly is of "high-quality".

Table 3: Homologous SNPs and InDels in the goose genome.

| Category          | Number | Proportion (%) |
|-------------------|--------|----------------|
| Homologous SNPs   | 23,324 | 0.0021         |
| Homologous InDels | 8,726  | 0.0078         |

#### OTHER POINTS

##### Comment 2-1:

Figure 1 and figure 2 are not very informative and I suggest moving these to the supplementary information

##### Response 2-1:

We agree with this suggestion from Reviewer 2. We have removed Figure 1 and Figure 4 to the supplementary figures, and have reordered the sequence of the corresponding supplementary figures.

##### Comment 2-2:

Line 89-90: The authors refer to table S1 in relation to the correction of sequencing errors. However, this table does not provide any information about sequencing errors.

##### Response 2-2:

We apologize for this inaccurate description. We have revised the main text to address this error, see lines 87–88.

##### Comment 2-3:

Line 90-91: The authors refer to table S2 and Fig S1. However, table S2 shows a summary of the pseudo chromosomes, not of the Hi-C scaffolds. Furthermore, in table S1 the authors show that there are 2123 Hi-C scaffolds. Please elaborate and clarify.



Response 2-3:

We regret the error in this description. Indeed, we state the length of the pseudo-chromosomes in the goose genome in Table S2, and present the Hi-C interaction contact heatmap of the pseudo-chromosomes in Figure S3. There are 2123 scaffolds in our goose genome assembly. This includes 68 scaffolds of 200bp to 2000bp, 2016 scaffolds of 2000bp to 350000bp, and 39 pseudo-chromosomes that are greater than 1Mb.

Comment 2-4:

Line 119-121: Again, the reference to the table/figure does not seem to match very well with the information in the text. I also suggest to add the number of PCG's to table 3. Also, does figure 2 only show the TSS for PCG or does it also include those for the lncRNAs.

Response 2-4:

Thank you for this valuable suggestion. Accordingly, we have added the number of PCGs to Table 3. In Figure 2, we show only the TSSs for PCGs. We have redrawn Figure 2.

Comment 2-5:

Line 128: I am confused by the comment that the current assembly has more scaffolds. Given that the assembly is improved with higher N50 values for the contigs and scaffolds, I would assume that the number would be smaller.

Response 2-5:

Thank you for raising this point. To display the quality of the genome assemblies, we analyzed the distribution of their scaffold lengths. In our goose genome, with the exception of the 39 pseudo-chromosomes, lengths of scaffolds are distributed from 2kb to 350kb (Table 4). This indicates that our assembly contains 39 pseudo-chromosomes (longer than 1Mb) and 2016 scaffolds (of lengths ranging from 2kb to 350kb). To supply more information for researchers, we did not filter the 2kb–350kb scaffolds from our genome assembly data. As a result, we have reported more scaffolds in this study than were reported in two previous studies. However, as the 39 pseudo-chromosomes we assembled account for 88.36% of the genome (Table 4, Figure 2), (The tables and figures were accessible from Response\_sup.pdf at: [https://fnca1-my.sharepoint.com/:b:/g/personal/guanglianggaocq\\_lwh\\_world/EQSV0ZIBk9HlaxEnZFufdcBf\\_eOaki7d4jJkNUz9Yrwpw?e=qcLxYV](https://fnca1-my.sharepoint.com/:b:/g/personal/guanglianggaocq_lwh_world/EQSV0ZIBk9HlaxEnZFufdcBf_eOaki7d4jJkNUz9Yrwpw?e=qcLxYV)), this suggests that our genome assembly is an improvement on previous goose assemblies.

Comment 2-6:

Line 129-131: This statement is not supported by table 3. In fact, the other studies seem to have annotated more gene sequences than the current assembly.

Response 2-6:

Thank you for this useful comment. In this study, we annotated more repeat regions (8.67%) (Table S3) and exon sequence regions (26,883,354bp, 2.41%) (Table 3) than in previous studies (Table 3). This suggests that we have generated an improved genome assembly and annotation. We have revised lines 132–133 of the manuscript to address this point.

Comment 2-7:

Line 195-196: "... indicating that disease resistance may help .....". I don't think this statement is supported by the results and tends to be mere story telling.

Response 2-7:

Thank you for identifying this issue. In lines 198–211, we have revised the original text as follows: "Some of these PSGs, such as GCH1 (GTP-cyclohydrolase I), are associated with parkinsonism, dystonia, and phenylketonuria disease in humans [7, 8]. They also play a role in adaptation to high-altitude environments in humans, where they relate to a lower hemoglobin level, nitric oxide concentration, and oxygen saturation in the blood. Furthermore, previous studies have shown GCH1 divergence between human populations living at different altitudes [9]. Selection acting on GCH1 in goose is likely to be related to their adaption to high-altitude or migratory habitats. SNW1 (SNW1 Domain Containing 1) is involved in the Nuclear Factor Kappa B pathway and is associated with oculopharyngeal muscular dystrophy disease [10, 11]. The depletion of this gene in breast cells leads to the induction of apoptosis, while the overexpression of this gene impedes neural crest development [12]. Selection acting on SNW1 in goose suggests that it may confer protection from diseases and aid

adaptation in changeable environments. POU2F3 is pivotal in the discrimination of taste qualities, such as sweet, umami and bitter characteristics. Deficiency in this gene in mice alters their electrophysiology and behavioral responses to taste characters [13, 14]. Selection acting on POU2F3 in goose is likely to be related to a requirement for seeking food in variable migratory habitats.”

References

1. Burton JN, Adey A, Patwardhan RP, Qiu R, Kitzman JO, Shendure J. Chromosome-scale scaffolding of de novo genome assemblies based on chromatin interactions. *Nat Biotechnol.* 2013; 31(12): 1119-1125.
2. Ghurye J, Rhie A, Walenz BP, et al. Integrating Hi-C links with assembly graphs for chromosome-scale assembly. *PLoS Comput Biol.* 2019; 15(8): e1007273.
3. Liu B, Shi Y, Yuan J, et al. Estimation of genomic characteristics by analyzing k-mer frequency in de novo genome projects. 2013.
4. Wang G, Jin L, Li Y, et al. Transcriptomic analysis between Normal and high-intake feeding geese provides insight into adipose deposition and susceptibility to fatty liver in migratory birds. *BMC Genomics.* 2019; 20(1): 372.
5. Lu L, Chen Y, Wang Z, et al. The goose genome sequence leads to insights into the evolution of waterfowl and susceptibility to fatty liver. *Genome Biol.* 2015; 16(1): 89.
6. Gao G, Zhao X, Li Q, et al. Genome and metagenome analyses reveal adaptive evolution of the host and interaction with the gut microbiota in the goose. *Sci Rep.* 2016; 6: 32961.
7. Yoshino H, Nishioka K, Li Y, et al. GCH1 mutations in dopa-responsive dystonia and Parkinson's disease. *J Neurol.* 2018; 265(8): 1860-1870.
8. Gu Y, Lu K, Yang G, et al. Mutation spectrum of six genes in Chinese phenylketonuria patients obtained through next-generation sequencing. *PLoS One.* 2014; 9(4): e94100.
9. Guo YB, He YX, Cui CY, et al. GCH1 plays a role in the high-altitude adaptation of Tibetans. *Zool Res.* 2017; 38(3): 155-162.
10. Verma S, De Jesus P, Chanda SK, Verma IM. SNW1, a Novel Transcriptional Regulator of the NF-κB Pathway. *Mol Cell Biol.* 2019; 39(3): e00415-18.
11. Tolde O, Folk P. Stress-induced expression of p53 target genes is insensitive to SNW1/SKIP downregulation. *Cell Mol Biol Lett.* 2011; 16(3): 373-384.
12. Wu MY, Ramel MC, Howell M, Hill CS. SNW1 is a critical regulator of spatial BMP activity, neural plate border formation, and neural crest specification in vertebrate embryos. *PLoS Biol.* 2011; 9(2): e1000593.
13. Huang YH, Klingbeil O, He XY, et al. POU2F3 is a master regulator of a tuft cell-like variant of small cell lung cancer. *Genes Dev.* 2018; 32(13-14): 915-928.
14. Matsumoto I, Ohmoto M, Narukawa M, Yoshihara Y, Abe K. Skn-1a (Pou2f3) specifies taste receptor cell lineage. *Nat Neurosci.* 2011; 14(6): 685-687.

|                                                                                                                                                                                                                                                                                                        |                 |
|--------------------------------------------------------------------------------------------------------------------------------------------------------------------------------------------------------------------------------------------------------------------------------------------------------|-----------------|
| <b>Additional Information:</b>                                                                                                                                                                                                                                                                         |                 |
| <b>Question</b>                                                                                                                                                                                                                                                                                        | <b>Response</b> |
| Are you submitting this manuscript to a special series or article collection?                                                                                                                                                                                                                          | No              |
| <b>Experimental design and statistics</b>                                                                                                                                                                                                                                                              | Yes             |
| <p>Full details of the experimental design and statistical methods used should be given in the Methods section, as detailed in our <a href="#">Minimum Standards Reporting Checklist</a>. Information essential to interpreting the data presented should be made available in the figure legends.</p> |                 |

|                                                                                                                                                                                                                                                                                                                                                                                                                                                                                                                                                         |            |
|---------------------------------------------------------------------------------------------------------------------------------------------------------------------------------------------------------------------------------------------------------------------------------------------------------------------------------------------------------------------------------------------------------------------------------------------------------------------------------------------------------------------------------------------------------|------------|
| <p>Have you included all the information requested in your manuscript?</p>                                                                                                                                                                                                                                                                                                                                                                                                                                                                              |            |
| <p><b>Resources</b></p> <p>A description of all resources used, including antibodies, cell lines, animals and software tools, with enough information to allow them to be uniquely identified, should be included in the Methods section. Authors are strongly encouraged to cite <a href="#">Research Resource Identifiers</a> (RRIDs) for antibodies, model organisms and tools, where possible.</p> <p>Have you included the information requested as detailed in our <a href="#">Minimum Standards Reporting Checklist</a>?</p>                     | <p>Yes</p> |
| <p><b>Availability of data and materials</b></p> <p>All datasets and code on which the conclusions of the paper rely must be either included in your submission or deposited in <a href="#">publicly available repositories</a> (where available and ethically appropriate), referencing such data using a unique identifier in the references and in the “Availability of Data and Materials” section of your manuscript.</p> <p>Have you have met the above requirement as detailed in our <a href="#">Minimum Standards Reporting Checklist</a>?</p> | <p>Yes</p> |

# 1 PacBio assembly with Hi-C mapping generates an improved, chromosome-level goose genome

2 Yan Li<sup>1,†</sup>, Guangliang Gao<sup>1,2,†,\*</sup>, Yu Lin<sup>1,†</sup>, Silu Hu<sup>1</sup>, Yi Luo<sup>1</sup>, Guosong Wang<sup>1,3</sup>, Long Jin<sup>1</sup>, Qigui Wang<sup>2</sup>,  
3 Jiwen Wang<sup>1</sup>, Qianzi Tang<sup>1</sup>, Mingzhou Li<sup>1,\*</sup>

4  
5 <sup>1</sup>Institute of Animal Genetics and Breeding, College of Animal Science and Technology, Sichuan  
6 Agricultural University, Chengdu 611130, China;

7 <sup>2</sup>Institute of Poultry Science, Chongqing Academy of Animal Sciences, Chongqing 402460, China;

8 <sup>3</sup>Department of Animal Science, Texas A&M University, College Station 77843, United States of  
9 America

10 <sup>†</sup>These authors contributed equally to this paper.

11 \* Corresponding author(s): Guangliang Gao: [guanglianggaocq@hotmail.com](mailto:guanglianggaocq@hotmail.com); Mingzhou Li:  
12 [mingzhou.li@sicau.edu.cn](mailto:mingzhou.li@sicau.edu.cn).

## 13 Abstract

### 14 Background:

15 The domestic goose is an economically important and scientifically valuable waterfowl; however,  
16 a lack of **high-quality** genomic data has hindered research concerning its genome, genetics, and breeding.  
17 As domestic geese breeds derive from both the swan goose (*Anser cygnoides*) and the graylag goose  
18 (*Anser anser*), we selected a female Tianfu goose for genome sequencing. We generated a **chromosome-**  
19 **level** goose genome assembly by adopting a hybrid *de novo* assembly approach that combined PacBio  
20 single-molecule real-time sequencing, high-throughput chromatin conformation capture mapping, and  
21 Illumina short-read sequencing.

### 22 Findings:

23 We generated a 1.11 Gb goose genome with contig and scaffold N50 values of 1.85 Mb and 33.12

24 Mb, respectively. The assembly contains 39 pseudo-chromosomes ( $2n = 78$ ) accounting for ca. 88.36%  
25 of the goose genome. Compared with previous goose assemblies, our assembly has more continuity,  
26 completeness, and accuracy; the annotation of core eukaryotic genes and universal single-copy orthologs  
27 has also been improved. We have identified 17,568 protein-coding genes (PCGs) and a repeat content of  
28 8.67% (96.57 Mb) in this genome assembly. We also explored the spatial organization of chromatin and  
29 gene expression in the goose liver tissues, in terms of inter-pseudo-chromosomal interaction patterns,  
30 compartments, topologically associating domains, and promoter-enhancer interactions.

### 31 **Conclusions:**

32 We present the first chromosome-level assembly of the goose genome. This will be a valuable  
33 resource for future genetic and genomic studies on geese.

34 **Key Words:** goose genome, chromosome-length assembly, hybrid *de novo* assembly approaches,  
35 annotation, Pacbio, Hi-C

36

## 37 **Data description**

### 38 **Context**

39 The goose is a member of the family Anatidae and is an economically important waterfowl with  
40 distinctive characters. Domesticated geese derive from the swan goose (*Anser cygnoides*) and the graylag  
41 goose (*Anser anser*)<sup>1</sup>, and approximately 6,000 years of artificial selection have led to significant  
42 alterations in their body size, reproductive performance, egg production, feather color, and other features<sup>2</sup>.  
43 Currently, more than 181 domesticated breeds are reared globally to supply meat, eggs, and valuable  
44 byproducts (feathers, fatty liver) for human consumption<sup>2,3,4</sup>. The domestic goose is also well suited to  
45 sustainable production practices because fiber can form part of its diet, which then lessens competition  
46 for human food<sup>5</sup>. Its excellent disease resistance and behavioral patterns also allow for large-scale

47 farming and easy management<sup>6</sup>. Interestingly, despite the liver weight of goose increasing 5–10 times  
48 after two to three weeks of overfeeding, the amount of fat in hepatic cells (and other biomedical  
49 parameters) returns to normal levels when overfeeding ceases. This suggests that the goose liver could  
50 provide a novel animal model for the study of human non-alcoholic fatty liver disease<sup>6</sup>.

51 The goose was one of the earliest animals to be domesticated<sup>2,7</sup>, and wide-ranging genomic and  
52 breeding research has been conducted to study its domestication process and the unique morphological  
53 and physiological features of these animals. For example, recently published goose genome sequences  
54 have been assembled into scaffolds using short reads from the Illumina platform<sup>8,9</sup>; however, the genetic  
55 basis of the fatty liver of goose and their selective breeding remains largely unknown. To address such  
56 issues, a high-quality genome sequence is required. Currently, there are many advantages to using hybrid  
57 *de novo* assembly approaches to improve the quality of genome assemblies. This is because short,  
58 accurate reads from the Illumina platform can be combined with the longer, less accurate reads generated  
59 by the single-molecule real-time (SMRT) sequencing platform<sup>10</sup>. With Hi-C, linking information can  
60 then be ordered and oriented into scaffolds, after which assembly errors can be identified and corrected<sup>11</sup>.  
61 This approach has been applied to improve the genome assemblies of many species, including humans<sup>12</sup>,  
62 goats<sup>13</sup>, rockfish<sup>14</sup>, *Aedes aegypti*<sup>11</sup>, and barley<sup>15</sup>.

63 Here, we have generated a chromosome-level goose assembly with chromosome-length scaffolds  
64 by adopting a hybrid *de novo* assembly approach using a combination of short reads from the Illumina  
65 platform, long reads from the PacBio platform, and Hi-C-based chromatin interaction maps. Our  
66 chromosome-level goose genome comprises longer scaffolds than currently available goose genome  
67 assemblies, and these scaffolds are of a higher-quality and are more continuous and accurate. Our new  
68 genome assembly thus provides a valuable resource for exploring the molecular basis of the



69 morphological and physiological features of the goose, and will facilitate further genomic, genetic, and  
70 breeding studies of this domesticated waterfowl.

## 71 **Methods**

### 72 **a) Sample collection and sequencing**

73 We extracted genomic DNA from the liver tissue of a healthy adult female (136 days old) from the  
74 Tianfu goose maternal line, which was provided by the Experimental Farm of Waterfowl Breeding of  
75 Sichuan Agricultural University (Chengdu, Sichuan, China; **Figure S1**). We then carried out single-  
76 molecule real-time DNA sequencing of ca. 20-kb inserts using the PacBio Sequel platform. This yielded  
77 approximately **84.31 Gb of high-quality sequencing data** that were used to initially assemble the genome  
78 (**Table 1**). Next, 149.70 Gb of high-quality sequencing data were generated from a 350-bp insert size Hi-  
79 C library, as previously reported<sup>13</sup>. Finally, 350-bp paired-end libraries constructed from the same  
80 genomic DNA were sequenced on the Illumina HiSeq platform, producing a further 181.52 Gb of  
81 sequence data. In total, we obtained approximately **415.53 Gb sequencing data** (ca. 324.63× coverage)  
82 for our chromosome-level goose genome assembly (**Table 1**).

### 83 **b) *De novo* assembly of the goose genome**

84 The size of the goose genome was estimated by k-mer distribution analysis to be 1.28 Gb. To  
85 assemble the genome, we first performed an initial assembly with the PacBio long-reads alone, using  
86 Falcon<sup>16</sup> software. We used the pbsmrtpipe pipeline of the smrtlink software to assembly the genome  
87 sequence, which resulted in a draft assembly with a contig N50 of 1.72 Mb (**Table S1**). Next, we used  
88 the single-molecule sequence reads to scaffold these contigs and fill gaps, using SSPACE-Long<sup>17</sup> and  
89 PBJelly<sup>18</sup>, respectively. Pilon<sup>19</sup> software was then used to map the short reads to the assembly (**Table S1**).  
90 Finally, **39 pseudo-chromosomes** were assembled with the Hi-C reads were aligned using Lachesis<sup>20</sup>

91 software (**Table S2, Figure S2**); this is consistent with the number of goose chromosomes ( $2n = 78$ )  
92 reported in previous studies<sup>21</sup>. With these methods, we generated a chromosome-level goose assembly  
93 with a contig N50 of 1.85 Mb and scaffold N50 of 33.12 Mb (**Table 2**). The average GC content is 42.15%  
94 and the total genome size is 1.11 Gb, which is consistent with previous studies<sup>8,9</sup> and suggests that our  
95 goose assembly is reliable.

### 96 **c) Repeat sequence and gene annotation**

97 *De novo* methods and homology-based approaches were used to annotate the repeat content of the  
98 goose genome. First, we used *ab initio*-prediction software, including LTR-finder<sup>22</sup>, RepeatMolder<sup>23</sup>, and  
99 RepeatScout<sup>24</sup>, to perform *de novo* annotation of the genome. For homology-based predictions, we  
100 identified repeat regions across species in published RepBase sequences<sup>25</sup> using RepeatMasker<sup>26</sup> and  
101 RepeatProteinMask<sup>27</sup> software. Combined with these results, the repeat region of the goose genome was  
102 further predicted with RepeatMasker software. From these analyses, we identified 92.11 Mb of repetitive  
103 DNA (**Table S3**) accounting for 8.67% of our assembly, which is much higher than has been reported in  
104 previous studies<sup>8,9</sup>. Long interspersed nuclear elements (LINEs) were the most abundant repeat element  
105 identified, representing 6.83% of the genome. The proportion of LINE repetitive sequences identified in  
106 this study was also higher than has been reported in two previous goose genome assemblies (**Table S3**).  
107 We performed PCGs annotation by combining *ab initio*-based, homology-based, and RNA-sequencing-  
108 based prediction methods. First, GenScan<sup>28</sup>, Geneid<sup>29</sup>, and Augustus<sup>30</sup> were used for *ab initio*-based  
109 predictions. Next, we selected six **chromosome-level** genomes, namely *Homo sapiens*  
110 (GCF\_000001405.39), *Mus musculus* (GCF\_000001635.26), *Gallus gallus* (GCF\_000002315.6), *Anas*  
111 *platyrhynchos* (GCF\_003850225.1), *Meleagris gallopavo* (GCF\_000146605.3), and *Taeniopygia guttata*  
112 (GCF\_003957565.1), to use for homology-based annotation of our goose chromosome-level assembly

113 genome using TBLASTN<sup>31</sup> and GeneWise<sup>32</sup> software. We found 8,255 common orthologous groups  
114 across these seven species (**Figure S3**). To optimize genome annotation, total RNA was extracted from  
115 11 samples (abdominal fat, brain, duodenum, heart, liver, lung, muscular stomach, ovary, pancreas,  
116 pectoral muscle, and spleen) taken from the same individual whose DNA was used for the **chromosome-**  
117 **level genome** assembly. We pooled equal amounts of the total RNA from each of the 11 tissues and then  
118 performed RNA-seq on this pooled sample using the Illumina platform. After filtering, these data were  
119 used to annotate protein-coding regions of the genome assembly using Trinity<sup>33</sup> and TopHat<sup>34</sup>. Finally,  
120 the predictions from each method described above were integrated using EVM<sup>35</sup>; overall, 17,568 PCGs  
121 were predicted (**Table 3, Figure S4**). To identify long noncoding RNAs (lncRNAs), the goose genome  
122 reads were aligned by STAR<sup>36</sup> and subjected to Cufflinks<sup>37</sup> and TACO<sup>38</sup> for assembly and filtering.  
123 CPC2<sup>39</sup> was then applied to perform coding potential analysis, and PfamScan<sup>40</sup> was used to check for  
124 domain hits against Pfam31-A<sup>41</sup>. **After removing all likely domains, 3,287 lncRNAs only by ab initio**  
125 **assembly method and 542 transcripts of uncertain coding potential (TUCP) were identified, the long**  
126 **reads will be helpful to improve the identification and annotation of the lncRNA and TUCP in goose**  
127 **genome.**

## 128 **Data validation and quality control**

### 129 **a) Assessment of genome assembly completeness**

130 Our assembly has more scaffolds and fewer contigs, and significantly improved contig and scaffold  
131 N50 values, than the goose genome assemblies presented in two previous studies (**Figure 1**). Moreover,  
132 we have annotated more repeat (Table S3) **and exons sequence regions (Table 3) than these previous**  
133 **studies (Table 3), which suggests that we have generated an improved genome assembly and annotation.**  
134 The 39 **pseudo-chromosomes** described in our study account for 88.36% of the assembled genome and

135 are longer than those previously reported<sup>8,9</sup>, again indicating that our chromosome-level goose genome  
136 represents a significant improvement on previous work. The GC content of our genome assembly is 42%  
137 and the size of the genome is 1.11 Gb (**Table 2**). This is comparable to the sizes reported for the two  
138 previously constructed goose genomes<sup>8,9</sup> and is characteristic of avian genomes<sup>42</sup>. We also mapped short-  
139 insert paired-end reads (350 bp) to our chromosome-level goose genome and obtained mapping and  
140 coverage rates of 97.25% and 99.71%, respectively. Finally, we downloaded 19 wild goose  
141 resequencing<sup>43</sup> datasets from public databases and mapped them to our assembly, and to the two earlier  
142 draft goose genomes. We found that the mapping rate of our chromosome-level goose assembly was  
143 higher than that of the previously assembled genomes (**Table S4**), indicating that it is more contiguous.  
144 Taken together, these results demonstrate the improvements made by our study in the assembly and  
145 annotation of the goose genome, in comparison to previous studies<sup>8,9</sup>.

146 To evaluate the completeness of our chromosome-level genome assembly, we determined the  
147 number of conserved eukaryotic and universal genes present in our assembly by applying the core  
148 eukaryotic genes mapping approach software (CEGMA) and using a set of benchmarking universal  
149 single-copy orthologs (BUSCO). We found that 211 of the 248 (85.08%) core eukaryotic genes and 2,586  
150 (97%) of the universal single-copy orthologs were assembled in our genome. Compared with previous  
151 studies, this suggests that our genome assembly is more complete than previous drafts of the goose  
152 genome<sup>8,9</sup>.

153 To explore the hypothesis that the leptin gene was lost from goose<sup>8</sup>, we downloaded leptin sequences  
154 from avian and mammal genomes to use as reference sequences in BLASTP searches of our newly  
155 assembled goose genome. We found no sequences similar to leptin in our chromosome-level goose  
156 assembly. Furthermore, although the human genome region that contains the leptin gene (chromosome

157 7, 126.0 to 129.4 Mb) aligned with the goose genome, we did not find a sequence similar to the leptin  
158 gene in this region. These results confirm the previous finding that the leptin gene is not present in the  
159 goose genome<sup>8</sup>.

## 160 **b) Phylogenetic tree and lineage-specific gene families**

161 Using OrthoMCL<sup>44</sup>, 16,157 orthologous gene families across 17 species (ostrich, duck, goose,  
162 chicken, turkey, saker, red-legged seriema, African crowned crane, pelican, little egret, crested ibis,  
163 cormorant, great crested grebe, pigeon, woodpecker, zebra finch, and lizard) were identified. Based on  
164 2,389 shared single-copy ortholog gene clusters, we constructed a maximum likelihood phylogenetic tree  
165 using the RAxML software<sup>45</sup>. This revealed that goose and duck diverged about 31.60 million years ago  
166 (Mya), which is comparable to the divergence time of chicken and turkey (32.33 Mya; **Figure S5**) and  
167 consistent with the previous studies<sup>[8,9]</sup>. We also noted that lineage-specific genes in the goose genome  
168 were significantly enriched for olfactory receptor activity (GO:0004984,  $p = 3.85 \times 10^{-24}$ ), G protein-  
169 coupled receptor activity (GO:0004930,  $p = 6.67 \times 10^{-13}$ ), and integral component of membrane  
170 (GO:0016021,  $p = 0.01$ ; **Table S5**). As a migratory bird, the goose is adapted for long-distance migration,  
171 which exposes them to a diversity of food as they seek out ideal habitats. **We propose that such influences**  
172 **might strengthen the interactions between odorants and the receptors of the olfactory mucosa, and could**  
173 **underlie receptor family evolution in the goose genome.**

## 174 **c) Expansion and contraction of gene families**

175 The expansions and contractions of gene clusters in the goose genome were identified in comparison  
176 to nine other avian genomes using the CAFE program<sup>46</sup>. We found 839 expanded gene families (**Table**  
177 **S6**) and 2,193 contracted gene families (**Table S7**). Interestingly, the expanded gene families were mainly  
178 enriched for olfactory receptor activity (GO:0004984,  $p = 8.58 \times 10^{-51}$ ), G protein-coupled receptor

179 activity (GO:0004930,  $p = 5.81 \times 10^{-25}$ ), and integral component of membrane (GO:0016021,  $p =$   
180  $3.20 \times 10^{-6}$ ), which is consistent with the results from our analysis of lineage-specific genes (**Table S5**).  
181 This further confirms that the migratory adaptations of the goose are reflected by unique characteristics  
182 in the goose genome that contrast with those of nonmigratory birds. Other expanded gene families were  
183 enriched for ATPase-coupled transmembrane transporter activity (GO:0042626,  $p = 1.96 \times 10^{-06}$ ),  
184 NAD(P)+-protein-arginine ADP-ribosyl transferase activity (GO:0003956,  $p = 3.20 \times 10^{-04}$ ), ATPase  
185 activity (GO:0016887,  $p = 8.28 \times 10^{-05}$ ), and aspartic-type endopeptidase activity (GO:0004190,  $p =$   
186  $9.63 \times 10^{-06}$ ; **Table S6**), while gene families contracted in the goose were significantly enriched for  
187 transmembrane transport (GO:0055085,  $p = 8.30 \times 10^{-04}$ ), ion channel activity (GO:0005216,  $p =$   
188  $1.87 \times 10^{-9}$ ), ion transmembrane transport (GO:0034220,  $p = 5.30 \times 10^{-6}$ ), and ATPase-coupled  
189 intramembrane lipid transporter activity (GO:0140326,  $p = 8.60 \times 10^{-10}$ ; **Table S7**). As these pathways  
190 are related to ATP utilization, ATP production, and energy regulation, these data support a previous  
191 finding that goose energy metabolism is different from that in other avian species<sup>47</sup>. **This feature of the**  
192 **goose is** possibility related to its migratory habits and artificial selection—the goose is unique among  
193 migratory birds because of its large body size, which requires much energy for long-distance, high  
194 altitude flying<sup>48</sup>.

#### 195 **d) Genes under positive selection**

196 We identified 52 positively selected genes (PSGs) in the goose genome based on orthologous genes  
197 from the 17 species above, using a branch-site model and F3x4 codon frequencies in Codeml (**Table S8**).  
198 **Some of these PSGs, such as *GCHI* (GTP-cyclohydrolase I), are associated with parkinsonism, dystonia,**  
199 **and phenylketonuria disease in humans<sup>49, 50</sup>. They also play a role in adaptation to high-altitude**  
200 **environments in humans, where they relate to a lower hemoglobin level, nitric oxide concentration, and**



201 oxygen saturation in the blood. Furthermore, previous studies have shown *GCHI* divergence between  
202 human populations living at different altitudes<sup>51</sup>. Selection acting on *GCHI* in goose is likely to be related  
203 to their adaption to high-altitude or migratory habitats. *SNWI* (SNW1 Domain Containing 1) is involved  
204 in the Nuclear Factor Kappa B pathway and is associated with oculopharyngeal muscular dystrophy  
205 disease<sup>52, 53</sup>. The depletion of this gene in breast cells leads to the induction of apoptosis, while the  
206 overexpression of this gene impedes neural crest development<sup>54</sup>. Selection acting on *SNWI* in goose  
207 suggests that it may confer protection from diseases and aid adaptation in changeable environments.  
208 *POU2F3* is pivotal in the discrimination of taste qualities, such as sweet, umami and bitter characteristics.  
209 Deficiency in this gene in mice alters their electrophysiology and behavioral responses to taste  
210 characters<sup>55,56</sup>. Selection acting on *POU2F3* in goose is likely to be related to a requirement for seeking  
211 food in variable migratory habitats.

#### 212 **e) Initial characterization of the three-dimensional organization of goose liver tissues**

213 We analyzed the inter-pseudo-chromosomal interaction pattern<sup>57</sup>, compartments<sup>58, 59</sup>, topologically  
214 associating domains (TADs)<sup>60</sup>, and promoter-enhancer interactions (PEI)<sup>61</sup> of the goose liver tissue. The  
215 matrix resolution of our Hi-C experiment reached ~2 Kb (defined as the smallest locus size such that 80%  
216 of loci have at least 1,000 contacts) (Figure S6), which was adequate for subsequent analyses of the  
217 chromatin architecture. Our results showed that the whole inter-pseudo-chromosomal interaction pattern  
218 was distinguished by two clusters, that is, short pseudo-chromosomes and longer pseudo-chromosomes,  
219 which suggests that goose pseudo-chromosomes tend to interact with one another on the basis of size  
220 (**Figure 2**). As for the identification of A and B compartments, which represent relatively active and  
221 inactive chromatin states, respectively, the number of protein-coding genes (PCGs) in each 100 Kb bin  
222 with at least 50 % percentage overlapped with a gene was counted. The number of PCGs was

223 significantly correlated with PC1 values ( $R = 0.39$ ,  $p = 2.2 \times 10^{-16}$ ; **Figure S7**), and the transcripts per  
224 kilobase millions (TPMs) of PCGs located in A compartments were consistently higher than PCGs in B  
225 compartments in three liver tissues ( $p = 2.2 \times 10^{-16}$ ; **Figure S8, Table S9**). We identified 734 TADs across  
226 the goose assembly, accounting for 80% of the genome (**Figure S9, Table S10**). The mean and median  
227 sizes of the TADs were 1.21 Mb and 1.00 Mb, respectively. We also observed that the TSSs of PCGs  
228 were enriched in TAD-boundary regions (**Figure S10**). After filtering for interaction distances lower than  
229 20 Kb, we identified 13,017 PEIs (**Table S11**) and found that gene expression levels positively correlated  
230 with the number of its associated enhancers in all three liver tissues (**Figure S11**). This is suggestive of  
231 additive effects of enhancers on target-gene transcription levels.

## 232 **Availability of supporting data**

233 The chromosome-level goose genome assembly sequence is available at National Center for  
234 Biotechnology Information (NCBI) GenBank through the accession number WTSS000000000; **The high-**  
235 **quality Hi-C data are available through the NCBI Sequence Read Archive (SRA)** database under  
236 accession number SRR10483522. The PacBio long-read sequencing data have been deposited in the  
237 NCBI SRA (SRR10483521). The high-quality Illumina short-read sequencing data are available through  
238 NCBI SRA accession number: SRR10483516, SRR10483517, SRR10483518 and SRR10483520. The  
239 transcriptome data are available through the NCBI SRR10483519.

## 240 **List of abbreviations**

- 241 (1) Anser anser : A. anser;
- 242 (2) Anser cygnoides : A. cygnoides;
- 243 (3) BUSCO: Benchmarking Universal Single-Copy Orthologs;
- 244 (4) CHMP1B: charged multivesicular body protein 1B;
- 245 (5) CEGMA: Core Eukaryotic Genes Mapping Approach software;

- 246 (6) TUCP: transcripts of uncertain coding potential;  
247 (7) GCH1: GTP cyclohydrolase 1;  
248 (8) Hi-C, Chromosome conformation capture;  
249 (9) IVNS1ABP: influenza virus NS1A binding protein;  
250 (10) LINES: Long interspersed nuclear elements;  
251 (11) LncRNAs: long noncoding RNAs;  
252 (12) OGFOD2: 2-oxoglutarate and iron dependent oxygenase domain containing 2  
253 (13) MDH257: malate dehydrogenase 2  
254 (14) PCGs: protein coding genes  
255 (15) PEI: promoter-enhancer interactions;  
256 (16) PSGs: positively selected genes;  
257 (17) SMRT: single-molecule real-time;  
258 (18) TADs: topological associated domains;  
259 (19) TPMs: transcripts per kilobase millions.

260

## 261 **Ethics approval**

262 All animal experiments were approved and reviewed by Animal Care and Use Committee  
263 Institutional of Sichuan Agricultural University (Approval No. DKY-B20121406) and the Ministry of  
264 Science and Technology of the People's Republic of China (Approval No. 2006–398).

265

## 266 **Competing interests**

267 The authors declare no competing interest.

268

## 269 **Acknowledgments**

270 This work was supported by grants from the National Key R & D Program of China  
271 (2018YFD0500403), the National Natural Science Foundation of China (U19A2036, 31872335,  
272 31772576 and 31802044) and the China Postdoctoral Science Foundation (2018M643514).

273 **Author contributions**

274 Mingzhou Li, Guangliang Gao designed and supervised the project. Yan Li, Yu Lin, Qianzi Tang,  
275 Silu Hu performed bioinformatics analyses. Jiwen Wang, Yan Li and Yi Luo contributed to collect the  
276 samples. Mingzhou Li, Qigui Wang, Guangliang Gao, Yi Luo and Long Jin were involved in the data  
277 analyses and wrote the manuscript.

278

279 **References**

- 280 1. Shi XW, Wang JW, Zeng FT, et al. Mitochondrial DNA cleavage patterns distinguish independent  
281 origin of Chinese domestic geese and western domestic geese. *Biochem Genet.* 2006; 44(5-6) : 237-  
282 245.
- 283 2. Kozák J. Variations of geese under domestication. *World's Poult Sci J.* 2019; 75(2): 247-260.
- 284 3. Goluch-Koniuszy Z, Haraf G. Geese for slaughter and wild geese as a source of selected mineral  
285 elements in a diet. *J Elementol.* 2018; 23: 1343-1360.
- 286 4. Janan J, Tóth P, Hutás I, et al. Effects of dietary micronutrient supplementation on the reproductive  
287 traits of laying geese. *Acta Fytotech Zootech.* 2015; 18(1) : 6-9.
- 288 5. Zhang Y, Sha Z, Guan F, et al. Impacts of geese on weed communities in corn production systems  
289 and associated economic benefits. *Biol Control.* 2016. 99: 47-52.
- 290 6. Wang G, Jin L, Li Y, et al. Transcriptomic analysis between Normal and high-intake feeding geese  
291 provides insight into adipose deposition and susceptibility to fatty liver in migratory birds. *BMC*  
292 *genomics.* 2019; 20(1): 372.
- 293 7. Honka J, Heino M, Kvist L, et al. Over a thousand years of evolutionary history of domestic geese  
294 from Russian archaeological sites, analysed using ancient DNA. *Genes.* 2018; 9(7): 367.

- 295 8. Lu L, Chen, Y, Wang Z, et al. The goose genome sequence leads to insights into the evolution of  
296 waterfowl and susceptibility to fatty liver. *Genome Biol.* 2015; 16(1): 89.
- 297 9. Gao G, Zhao X, Li Q, et al. Genome and metagenome analyses reveal adaptive evolution of the host  
298 and interaction with the gut microbiota in the goose. *Sci Rep.* 2016; 6: 32961.
- 299 10. Schadt E, Turner S, Kasarskis A. A window into third-generation sequencing. *Hum Mol Genet.*  
300 2010; 19(R2): R227-R240.
- 301 11. Dudchenko O, Batra SS, Omer AD, et al. *De novo* assembly of the *Aedes aegypti* genome using  
302 Hi-C yields chromosome-length scaffolds. *Science.* 2017; 356(6333): 92-95.
- 303 12. Pendleton M, Sebra R, Pang AWC, et al. Assembly and diploid architecture of an individual human  
304 genome via single-molecule technologies. *Nat Methods.* 2015; 12(8): 780–786.
- 305 13. Bickhart DM, Rosen BD, Koren S, et al. Single-molecule sequencing and chromatin conformation  
306 capture enable *de novo* reference assembly of the domestic goat genome. *Nat Genet.* 2017; 49(4):  
307 643.
- 308 14. Liu Q, Wang X, Xiao Y, et al. Sequencing of the black rockfish chromosomal genome provides  
309 insight into sperm storage in the female ovary. *DNA Research*, 2019. 26(6):453–464,
- 310 15. Mascher M, Gundlach H, Himmelbach A, et al. A chromosome conformation capture ordered  
311 sequence of the barley genome. *Nature.* 2017; 544(7651): 427
- 312 16. Chin CS, Peluso P, Sedlazeck FJ et al. Phased diploid genome assembly with single molecule real-  
313 time sequencing. *Nat Methods.* 2016;13:1050.
- 314 17. Boetzer M, Pirovano W. SSPACE-LongRead: scaffolding bacterial draft genomes using long read  
315 sequence information. *BMC Bioinf.* 2014; 15(1): 211.
- 316 18. English AC, Richards S, Han Y, et al. Mind the gap: upgrading genomes with Pacific Biosciences

- 317 RS long-read sequencing technology. PLoS One. 2012; 7(11): e47768.
- 318 19. Walker BJ, Abeel T, Shea T, et al. Pilon: an integrated tool for comprehensive microbial variant  
319 detection and genome assembly improvement. Plos One. 2014; 9(11): e112963.
- 320 20. Burton JN, Adey A, Patwardhan RP, et al. Chromosome-scale scaffolding of *de novo* genome  
321 assemblies based on chromatin interactions. Nat Biotechnol. 2013; 31(12): 1119–1125.
- 322 21. Jun X, Tianxing L, Qing C, et al. Karyotypes of Zhedong White Goose and Siji Goose. China Poultry.  
323 2007; 21(9): 27-29.
- 324 22. Benson G. Tandem repeats finder: a program to analyze DNA sequences. Nucleic Acids Res. 1999;  
325 27(2): 573–580.
- 326 23. RepeatMolder software. <http://www.repeatmasker.org/RepeatModeler/>.
- 327 24. Price AL, Jones NC, Pevzner PA. De novo identification of repeat families in large genomes.  
328 Bioinformatics 2005;21(suppl 1):i351–8.
- 329 25. Price AL, Jones NC, Pevzner PA. De novo identification of repeat families in large genomes.  
330 Bioinformatics. 2005;21:i351–8. Bao W, Kojima KK, Kohany O. Repbase Update, a database of  
331 repetitive elements in eukaryotic genomes. Mobile DNA. 2015; 6(1):11.
- 332 26. Maja TG, Nansheng C. Using RepeatMasker to identify repetitive elements in genomic sequences.  
333 Curr Protoc Bioinf. 2009; 25(1): 4.10.11–14.10.14.
- 334 27. Allred DB, Cheng A, Sarikaya M, et al. . Three-dimensional architecture of inorganic nanoarrays  
335 electrodeposited through a surface-layer protein mask. Nano Lett. 2008;8(5):1434–8.
- 336 28. Burge C, Karlin S. Prediction of complete gene structures in human genomic DNA. J Mol Biol.  
337 1997; 268(1): 78–94.
- 338 29. Blanco E, Parra G, Guigó R. Using geneid to identify genes. Curr Protoc Bioinf. 2007; 18(1): 4.3.1-



339 4.3.28.

340 30. Stanke M, Steinkamp R, Waack S. AUGUSTUS: a web server for gene finding in eukaryotes.  
341 Nucleic Acids Res. 2004; 32(suppl\_2): W309–W312.

342 31. Gertz EM, Yu YK, Agarwala, R., Schäffer, A. A. & Altschul, S. F. Composition-based statistics and  
343 translated nucleotide searches: improving the TBLASTN module of BLAST. BMC Biol. 2006; 4(1):  
344 41.

345 32. Birney E, Clamp M, Durbin R. Gene Wise and Genomewise. Genome Res. 2004; 14(5): 988–995.

346 33. Grabherr MG, Haas BJ, Yassour M, et al. Full-length transcriptome assembly from RNA-Seq data  
347 without a reference genome. Nat Biotechnol. 2011; 29(7): 644–652.

348 34. Trapnell C, Pachter L, Salzberg SL. TopHat: discovering splice junctions with RNA-Seq.  
349 Bioinformatics. 2009; 25(9): 1105–1111.

350 35. Haas BJ, Salzberg SL, Zhu W, et al. Automated eukaryotic gene structure annotation using  
351 EVIDENCEModeler and the Program to Assemble Spliced Alignments. Genome Biol. 2008; 9(1): R7.

352 36. Dobin A, Davis CA, Schlesinger F, et al. STAR: ultrafast universal RNA-seq aligner. Bioinformatics.  
353 2013; 29(1): 15–21.

354 37. Trapnell C, Williams BA, Pertea G, et al. Transcript assembly and quantification by RNA-Seq  
355 reveals unannotated transcripts and isoform switching during cell differentiation. Nat Biotechnol.  
356 2010; 28(5): 511–515.

357 38. Niknafs YS, Pandian B, Iyer HK, et al. TACO produces robust multisample transcriptome  
358 assemblies from RNA-seq. Nat Methods. 2017; 14(1): 68.

359 39. Kang YJ, Yang DC, Kong L, et al. CPC2: a fast and accurate coding potential calculator based on  
360 sequence intrinsic features. Nucleic Acids Res. 2017; 45(W1): W12-W16.

- 361 40. Finn RD, Bateman A, Clements J, et al. Pfam: the protein families database. *Nucleic Acids Res.*  
362 2014; 42(D1): D222–D230.
- 363 41. Bateman A, Coin L, Durbin R, et al. The Pfam protein families database. *Nucleic Acids Res.* 2004;  
364 32 (suppl\_1): D138–D141.
- 365 42. Zhang G, Li C, Li Q, et al. Comparative genomics reveals insights into avian genome evolution and  
366 adaptation. *Science.* 2014; 346(6215): 1311-1320.
- 367 43. Ottenburghs J, Megens HJ, Kraus RH, et al. A history of hybrids? Genomic patterns of introgression  
368 in the True Geese. *BMC Evol Biol.* 2017; 17(1): 201.
- 369 44. Fischer S, Brunk BP, Chen F, et al. Using OrthoMCL to assign proteins to OrthoMCL- DB groups  
370 or to cluster proteomes into new ortholog groups. *Curr Protoc Bioinf.* 2011; 35(1): 6-12.
- 371 45. Stamatakis A. RAxML version 8: a tool for phylogenetic analysis and post-analysis of large  
372 phylogenies. *Bioinformatics.* 2014; 30(9): 1312–1313.
- 373 46. Bie T, Cristianini N, Demuth J. CAFE: a computational tool for the study of gene family evolution.  
374 *Bioinformatics.* 2006; 22(10): 1269-1271.
- 375 47. Józefiak DA, Rutkowski A, Martin SA. Carbohydrate fermentation in the avian ceca: a review.  
376 *Anim Feed Sci Technol.* 2004; 113(1-4): 1-15.
- 377 48. Watanabe, YY. Flight mode affects allometry of migration range in birds. *Ecol Lett.* 2016; 19(8):  
378 907-914.
- 379 49. Yoshino H, Nishioka K, Li Y, et al. GCH1 mutations in dopa-responsive dystonia and Parkinson's  
380 disease[J]. *J Neuro*, 2018, 265(8): 1860-1870.
- 381 50. Gu Y, Lu K, Yang G, et al. Mutation spectrum of six genes in Chinese phenylketonuria patients  
382 obtained through next-generation sequencing[J]. *PLoS One*, 2014, 9(4): e94100.

- 383 51. He Y B, Duojizhuoma C Y, Cai-juan D B, et al. GCH1 plays a role in the high-altitude adaptation  
384 of Tibetans. *Zool Res.* 2017; 38(3): 155–162.
- 385 52. Verma S, De Jesus P, Chanda S K, et al. SNW1, a novel transcriptional regulator of the NF- $\kappa$ B  
386 pathway. *Mol Cell Biol.* 2019; 39(3): e00415-18.
- 387 53. Tolde O, Folk P. Stress-induced expression of p53 target genes is insensitive to SNW1/SKIP  
388 downregulation[J]. *Cell Mol Biol Lett*, 2011, 16(3): 373-384.
- 389 54. Wu M Y, Ramel M C, Howell M, et al. SNW1 is a critical regulator of spatial BMP activity, neural  
390 plate border formation, and neural crest specification in vertebrate embryos[J]. *PLoS Biol*, 2011,  
391 9(2): e1000593.
- 392 55. Huang Y H, Klingbeil O, He X Y, et al. POU2F3 is a master regulator of a tuft cell-like variant of  
393 small cell lung cancer. *Gene Dev.* 2018; 32(13-14): 915-928.
- 394 56. Matsumoto I, Ohmoto M, Narukawa M, et al. Skn-1a (Pou2f3) specifies taste receptor cell  
395 lineage[J]. *Nat Neurosci*, 2011, 14(6): 685.
- 396 57. Battulin N, Fishman VS, Mazur AM, et al. Comparison of the three-dimensional organization of  
397 sperm and fibroblast genomes using the Hi-C approach. *Genome Biol.* 2016; 17(1): 6.
- 398 58. Lieberman-Aiden E, van Berkum NL, Williams L, et al. Comprehensive mapping of long-range  
399 interactions reveals folding principles of the human genome. *Science.* 2009; 326(5950): 289-293.
- 400 59. Rowley MJ, Nichols MH, Lyu X, Ando-Kuri M, et al. Evolutionarily Conserved Principles Predict  
401 3D Chromatin Organization. *Mol Cell.* 2017; 67(5): 837-852.
- 402 60. Dixon JR, Selvaraj S, Yue F, et al. Topological domains in mammalian genomes identified by  
403 analysis of chromatin interactions. *Nature.* 2012; 485(7389): 376-380.
- 404 61. Ron G, Globerson Y, Moran D and Kaplan T. Promoter-enhancer interactions identified from Hi-C

405 data using probabilistic models and hierarchical topological domains. Nat Commun. 2017; 8(1):  
406 2237.

**Table1 Summary of sequencing data for goose genome assembly.**

| <b>Pair-end libraries</b> | <b>Insert size (bp)</b> | <b>Total data (Gb)</b> | <b>Read length (bp)</b> | <b>Sequence coverage (x)</b> |
|---------------------------|-------------------------|------------------------|-------------------------|------------------------------|
| <b>Illumina reads</b>     | 350                     | 181.52                 | 150                     | 141.81                       |
| <b>Pacbio reads</b>       | 20,000                  | 84.31                  |                         | 65.86                        |
| <b>Hi-C</b>               | 350                     | 149.70                 | 150                     | 116.95                       |
| <b>Total</b>              |                         | 415.53                 |                         | 324.63                       |

**Table2 Comparison of quality metrics of this study and the previous goose genome assemblies.**

| <b>Genomic features</b>                     | <b>This study</b> | <b>Lu <i>et al.</i><sup>a</sup></b> | <b>Gao <i>et al.</i><sup>b</sup></b> |
|---------------------------------------------|-------------------|-------------------------------------|--------------------------------------|
| Estimation of genome size (bp)              | 1,277,099,016     | 1,208,661,181                       | 1,198,802,839                        |
| Total length of assembled contigs (bp)      | 1,113,842,245     | 1,086,838,604                       | 1,100,859,441                        |
| Total size of assembled scaffolds (bp)      | 1,113,913,845     | 1,122,178,121                       | 1,130,663,797                        |
| Number of contigs (>2kb)                    | 2,771             | 60,979                              | 53,336                               |
| Number of scaffolds (>2kb)                  | 2,055             | 1,050                               | 1,837                                |
| Contigs N50 (bp)                            | 1,849,874         | 27,602                              | 35,032                               |
| Scaffolds N50 (bp)                          | 33,116,532        | 5,202,740                           | 5,103,766                            |
| Longest contig (bp)                         | 10,766,871        | 201,281                             | 399,111                              |
| Longest scaffold (bp)                       | 70,896,740        | 24,051,356                          | 20,207,557                           |
| GC content (%)                              | 42.15             | 38.00                               | 41.68                                |
| Number of gene model                        | 17,568            | 16,150                              | 16,288                               |
| Repetitive regions percentage of genome (%) | 8.67              | 6.33                                | 6.90                                 |

<sup>a</sup> From the ref. 8. <sup>b</sup> From the ref. 9.



**Table 3 A comparative summary of predicted genes within each goose genome assembly.**

| <b>Property</b>                | <b>This study</b> | <b>Lu <i>et al.</i><sup>a</sup></b> | <b>Gao <i>et al.</i><sup>b</sup></b> |
|--------------------------------|-------------------|-------------------------------------|--------------------------------------|
| Total PCG length (bp)          | 326,863,440       | 439,289,059                         | 500,923,091                          |
| PCG number                     | 17,568            | 16,150                              | 16,288                               |
| PCG percentage of genome (%)   | 29.34             | 39.25                               | 44.31                                |
| Total exons number             | 152,392           | 158,713                             | 167,532                              |
| Average exons per gene         | 8.67              | 10.92                               | 10.29                                |
| Total exons length (bp)        | 26,883,354        | 25,763,242                          | 26,157,477                           |
| Exons percentage of genome (%) | 2.41              | 2.31                                | 2.31                                 |
| Average exons length (bp)      | 176.41            | 162.33                              | 156.13                               |
| Average introns length (bp)    | 2224.97           | 2867.48                             | 3139.07                              |

<sup>a</sup> From the ref. 8. <sup>b</sup> From the ref. 9.

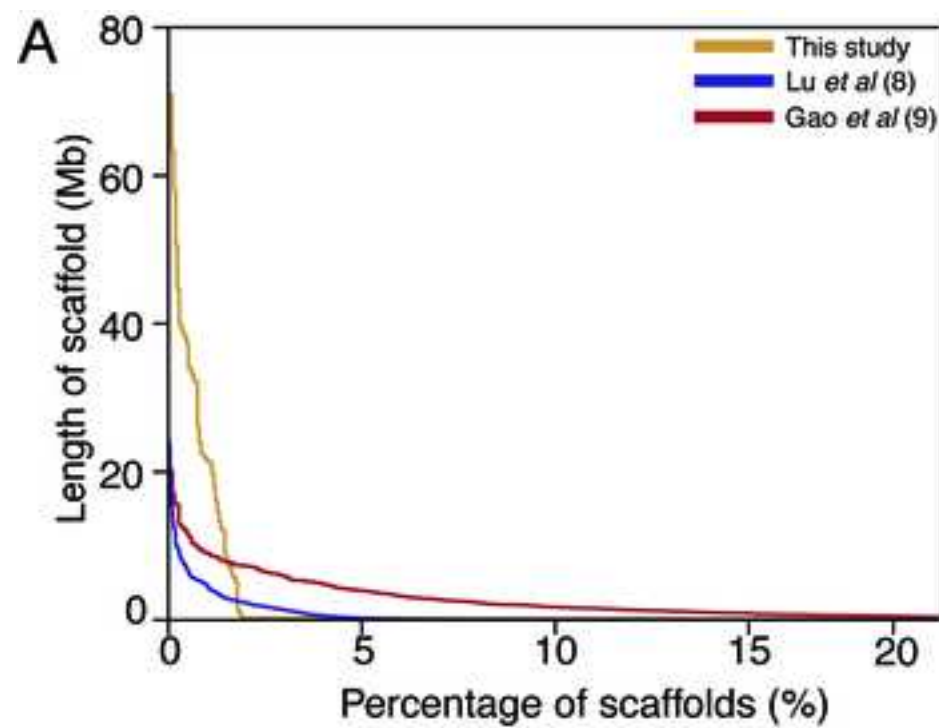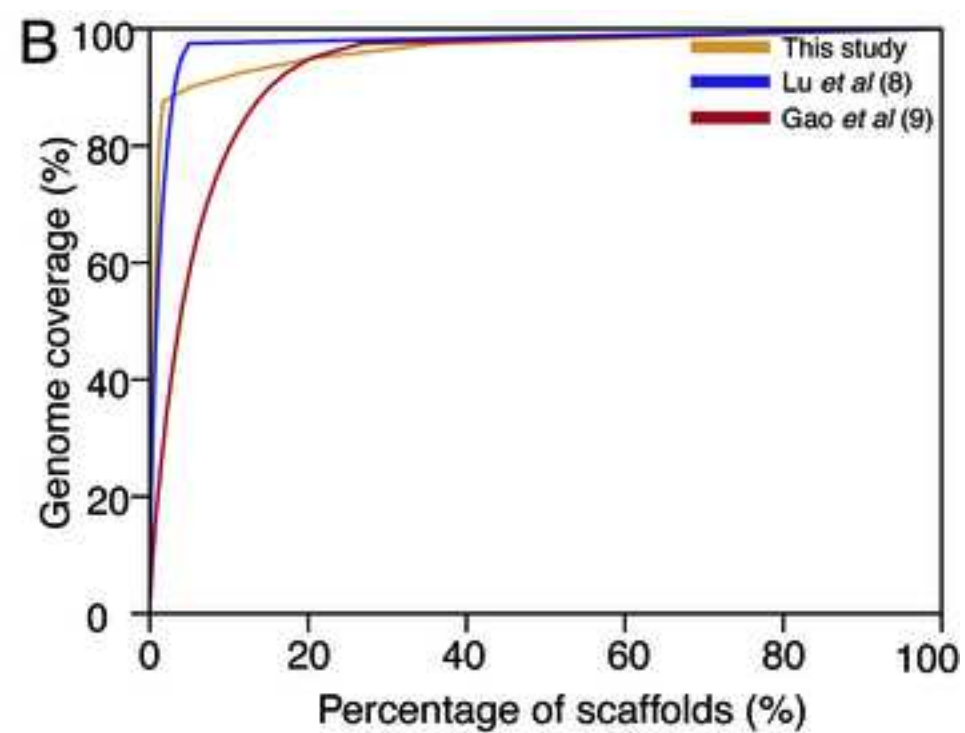

Figure 2 Dendrogram of inter-pseudo-chromosome interaction patterns generated by the average linkage algorithm.

[Click here to access/download;Figure;Figure 2u.tif](#)

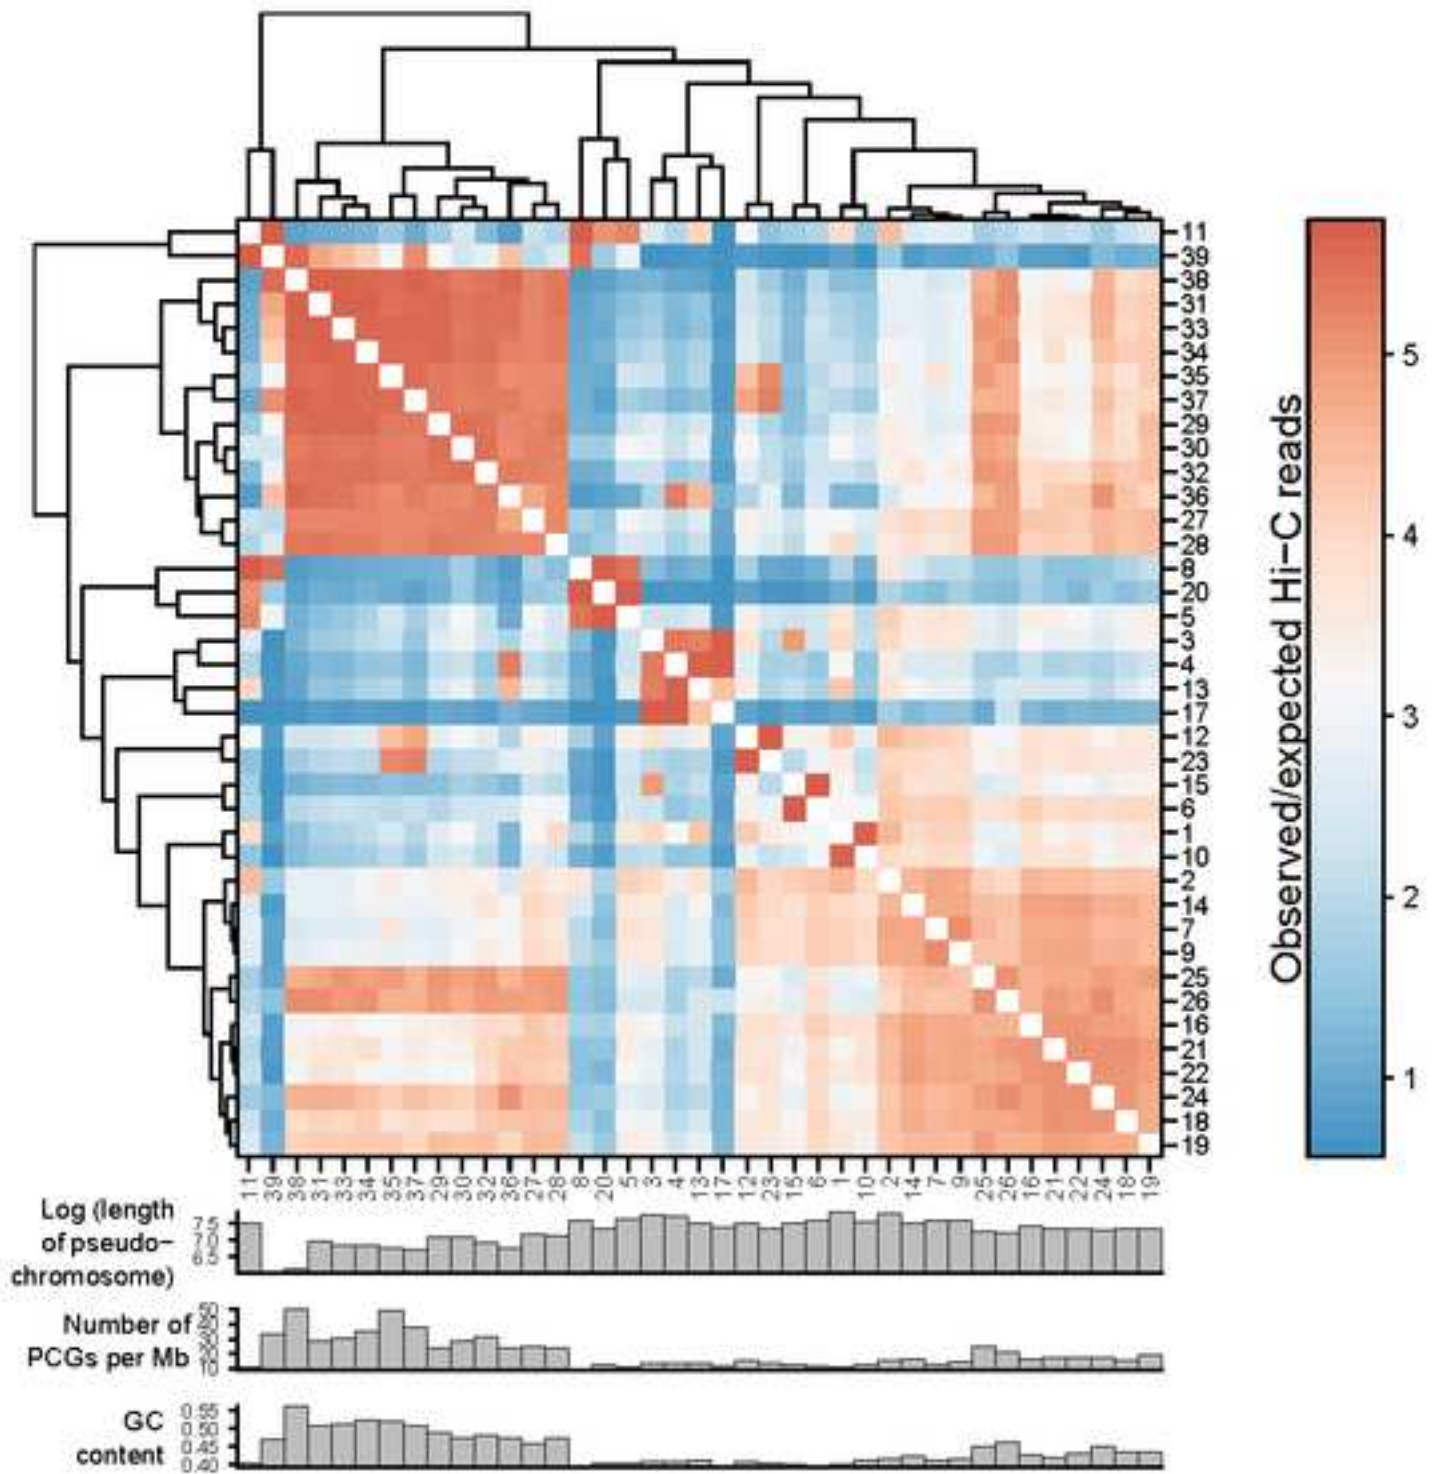

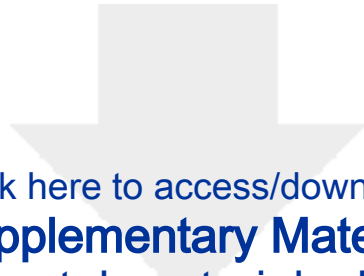

Click here to access/download  
**Supplementary Material**  
Supplymental\_materials.docx.docx

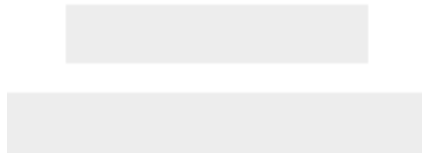

Table S1 Summary of the Pacbio initial assembly and Hi-C reads mapping used for goose genome assembly process.

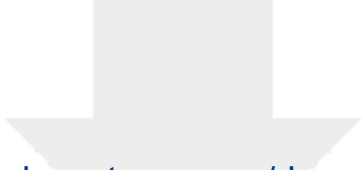

Click here to access/download  
**Supplementary Material**  
Table S1.xls



Table S2 Summary of the length of pseudo-chromosomes in  
goose genome.

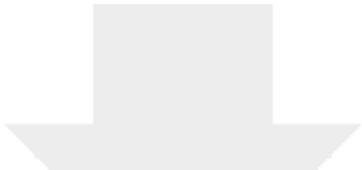

Click here to access/download  
**Supplementary Material**  
Table S2.xls



Table S3 A comparative summary of assembled repeat content between this study and previous studies.

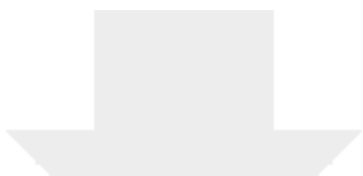

Click here to access/download  
**Supplementary Material**  
Table S3.xls



Table S4 Comparison of the mapping rates of the wild goose  
resequencing data between our goose genome and two previous

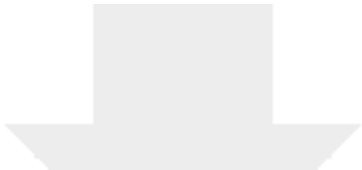

Click here to access/download  
**Supplementary Material**  
Table S4.xls





Table S5 Gene ontology (GO) enrichment analysis for the lineage-specific genes annotated in goose genome.

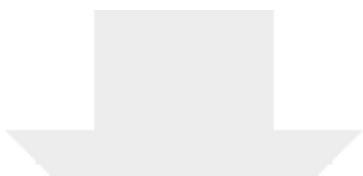

Click here to access/download  
**Supplementary Material**  
Table S5.xls



Table S6 Functional gene categories enriched for the goose  
genome-specific expansion gene families.

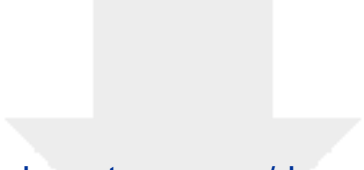

Click here to access/download  
**Supplementary Material**  
Table S6.xls



Table S7 Functional gene categories enriched for the contraction of gene families in goose genome.



Click here to access/download  
**Supplementary Material**  
Table S7.xls



Table S8 Positively selected genes (PSGs) identified in the goose genome.



Click here to access/download  
**Supplementary Material**  
Table S8.xlsx



Table S9 The PC1 values (100 Kb) through Principal Component Analysis (PCA) and A-B index values (25 Kb).



Click here to access/download  
**Supplementary Material**  
Table S9.xlsx

Table S10 TAD in genome coordinates of our goose genome by using method of DI values.



Click here to access/download  
**Supplementary Material**  
Table S10.xlsx



Table S11 Detailed information of promoter-enhancer interactions (PEIs) identified in goose genome.



Click here to access/download  
**Supplementary Material**  
Table S11.xlsx

Figure S1 A picture of a female adult goose used for genome sequencing.

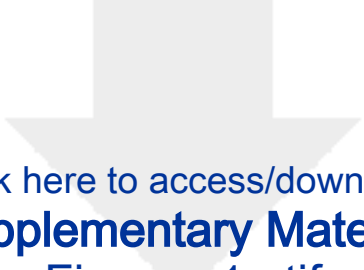

Click here to access/download  
**Supplementary Material**  
Figure s1u.tif





Figure S2 The Hi-C interaction contact heatmap of goose  
pseudochromosome genome assembly (bin size is 1Mb).



Click here to access/download  
**Supplementary Material**  
Figure S2u.jpg



Figure S3 The shared homologous gene families across the six species (Chicken, Goose, Human, Mouse, Pig, Zebra finch).

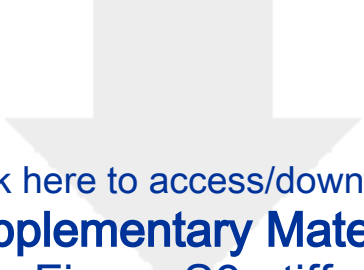

Click here to access/download  
**Supplementary Material**  
Figure S3u.tiff



Figure S4 The distribution of gene density in the goose genome.  
Number of PCGs in each 1Mb bins was counted.

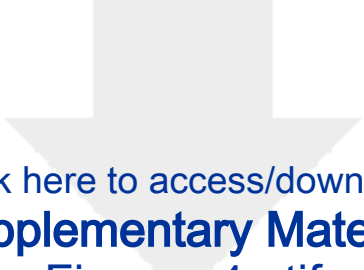

Click here to access/download  
**Supplementary Material**  
Figure s4u.tif



Figure S5 Divergence of time and the expansion, contraction gene families in the seventeen species (Ostrich, Duck, Goose, Chicken,



Click here to access/download  
**Supplementary Material**  
Figure S5.jpg



Figure S6 Resolution evaluation showing that the Hi-C data attained 2 Kb.



Click here to access/download  
**Supplementary Material**  
Figure S6.tif



Figure S7 Vioplot of PC1 values in 100 Kb bins with various number of PCGs. PC1 value indicates the chromatin activity.



Click here to access/download  
**Supplementary Material**  
Figure S7u.tif



Figure S8 TPMs of PCGs located in A compartments were consistently higher than PCGs in B compartments both at 25 Kb



Click here to access/download  
**Supplementary Material**  
Figure S8u.tif





Click here to access/download  
**Supplementary Material**  
Figure S9.tif







Click here to access/download  
**Supplementary Material**  
Figure S10u.tif

Figure S11 Gene expression levels positively correlated with the number of its associated enhancers in all three liver tissues,

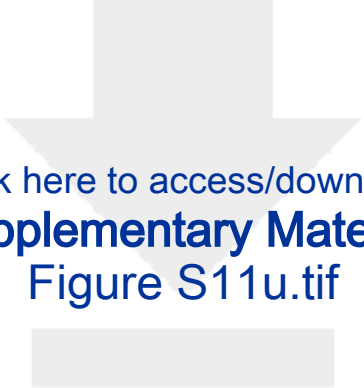

Click here to access/download  
**Supplementary Material**  
Figure S11u.tif

## GigaScience

[marvann@gigasciencejournal.com](mailto:marvann@gigasciencejournal.com)

Dear Mary Ann Tuli

Please find enclosed our revised manuscript, "PacBio assembly with Hi-C mapping generates an improved, chromosome-level goose genome (GIGA-D-20-00133)", which we would like to resubmit to *GigaScience*. We sincerely appreciate the very thoughtful and constructive comments from the two anonymous referees. We have adhered to the referees' comments and believe that we have adequately addressed all their questions and concerns. We have made all the changes in the revised version of the manuscript, and our point-by-point responses to the reviewer's comments are given below. We trust that the revised manuscript now meets the standards required for publication in *GigaScience*.

We look forward to hearing a positive response from you.

Best regards

Mingzhou Li

Ph.D/Professor/

Address: Institute of Animal Genetics and Breeding, College of Animal Science and Technology, Sichuan Agricultural University, Chengdu 611130, China.

E-mail: [mingzhou.li@sicau.edu.cn](mailto:mingzhou.li@sicau.edu.cn)

## Detailed responses to Reviewers

Below, all critiques and suggestions provided by the reviewers are cited in gray italics; our responses are in black. In red are descriptions within the responses that indicate changes in the manuscript. Moreover, all revisions in the manuscript are marked in red.

---

**Reviewer 1**

*This paper reports on the assembly and annotation of the Tianfu goose genome, a female hybrid of *A. anser* x *A. cygnoides*. This assembly is a significant improvement on earlier genomes, which were based on short read technologies. This assembly is a hybrid of three technologies: short reads, long reads and HiC maps.*

**Comment 1:***MAJOR POINTS*

*1. The assignment of 39 chromosomes to Hi-C scaffolds is very tentative and needs to be validated. For larger scaffold you could establish homology e.g. with chicken chromosomes, which have extensive FISH/cytogenetic data at least for the macrochromosomes. The smaller scaffolds in the HiC analysis could be parts of larger chromosomes - the HiC map suggests some mis-joins. Also in other genome projects very GC-rich, repeat-rich chromosomes (such as microchromosomes) are difficult if not impossible to sequence, and are missing from the assembly. So 39 pseudo-chromosomes are found but these do not equate to the 39 physical chromosomes. This affects conclusions on chromosome number, genome completeness, gene density distribution, distribution of TADs, etc. As a reference goose genome these points need to be addressed.*

**Response 1 :**

Thank you for this valuable suggestion. We recognize the importance of a reference genome that comprises accurate, physical chromosomes for future genetic and genomic studies on geese. In this study, we generated a 1.11 Gb goose genome with contig and scaffold N50 values of 1.85 Mb and 33.12 Mb, respectively (Table 1). Our assembly contains 39 pseudo-chromosomes ( $2n = 78$ ), which account for 88.36% of the goose genome; it is a draft goose genome assembly rather than a complete assembly of 39 physical chromosomes. As far as we know, this genome is comparable with other chromosome-level avian genome assemblies (Table 1).

We regret that our original description implied a complete genome assembly of 39 chromosomes. We have corrected this point by stating throughout the manuscript that our assembly is a chromosome-level goose genome assembly comprising 39 pseudo-chromosomes.

**Table 1: Comparison of quality metrics of goose, chicken, duck, turkey, and zebra finch genome assemblies.**

|                            | Goose<br>(This study) | Chicken<br>GCF_000002315.6 | Duck<br>GCF_003850225.1 | Turkey<br>GCF_000146605.3 | zebra finch<br>GCF_003957565.1 |
|----------------------------|-----------------------|----------------------------|-------------------------|---------------------------|--------------------------------|
| Assembly level             | pseudo-chromosome     | chromosome                 | chromosome              | chromosome                | chromosome                     |
| Total sequence length (bp) | 1,113,842,245         | 1,065,365,434              | 1,126,176,092           | 1,115,474,681             | 1,058,012,133                  |
| Number of scaffolds        | 2,123                 | 525                        | 2,150                   | 187,695                   | 135                            |
| Scaffold N50 (bp)          | 33,116,532            | 20,785,086                 | 76,129,154              | 3,898,092                 | 70,430,603                     |
| Number of contigs          | 2,771                 | 1,403                      | 73,853                  | 250,220                   | 444                            |
| Contig N50 (bp)            | 1,849,874             | 17,655,422                 | 36,805                  | 27,076                    | 11,998,827                     |

### *OTHER POINTS*

#### **Comment 1-1:**

*1. This is a chromosome-level assembly make this clear in the text.*

#### **Response 1-1:**

In accordance with Reviewer 1's suggestion, we have clarified that it is a chromosome-level assembly throughout the manuscript.

#### **Comment 1-2:**

*2. The hybrid approach used here is good but this is a rapidly evolving field, and is already superseded by technology (Pacbio HiFi now so polishing using short reads not needed) and software (e.g. Lachesis no longer supported).*

#### **Response 1-2:**

Thank you for this valuable insight. Certainly, *de novo* whole-genome assembly approaches change over time, and algorithms adapt in line with evolving sequencing technologies. This allows researchers to generate more continuous, complete, and accurate genome assemblies. To facilitate genomic, genetic, and breeding studies on the goose, we report here an improved, chromosome-level goose genome for the scientific community. We expect that our current goose assembly and annotation will be helpful for researchers in different study fields. Furthermore, we remain committed to assembling a complete and accurate goose genome sequence in the future. For this

purpose, we plan to adopt the Pacbio HiFi and Pacbio isoseq technologies, and combine them with extensive FISH and cytogenetic experiments, and genetic map data.

Regarding the three software packages, LACHESIS, SALSA2, and 3D-DNA, each have advantages and limitations for *de novo* genome assembly. Namely, (1) while we employed the LACHESIS software to combine shotgun fragments and short jump mate-pair sequences with Hi-C data (to generate chromosome-scale *de novo* genome assemblies), LACHESIS has limitations when assembling polyploid genomes [1]. (2) The SALSA2 algorithm does not require that the number of chromosomes are set in advance, which improves the accuracy of scaffolds to a certain extent; however, this algorithm can introduce many clustering/sorting/orientation errors, and few parameters can be adjusted during operation [2]. (3) 3D-DNA corrects errors in the input assembly and then iteratively orients and orders contigs into a single mega-scaffold. This mega-scaffold is then broken, and chromosomal ends are identified based on a Hi-C contact map. A drawback is that the error correction function in this software has not been well applied; in the case of simulated data, the assembly error rate of 3D-DNA is 2–4 times that of SALSA2 [2].

To choose an appropriate software for our genome assembly, we randomly selected a subset of our Hi-C data and performed *de novo* genome assembly using SALSA2, 3D-DNA, and LACHESIS. As the quality metrics of the LACHESIS genome assemblies were the best, we performed the subsequent studies in this paper with the LACHESIS software.

### **Comment 1-3:**

*3. The phrase "high-quality" is used throughout the text but not defined - so please define. It is more likely that sequence data is generated (provide QC data on quality) and then software is used to filter out poor data, to leave high-quality data for assembly.*

### **Response 1-3**

Thank you for this useful insight. In our manuscript, the phrase "high-quality" refers to data that was filtered from three sequencing platforms and used for the genome assembly. For the short reads, we employed a Perl script written by our lab to filter the data from the Illumina platform. As a result, the Q20 and Q30 values of the whole genome sequencing data from the Illumina platform were greater than 96.44 % and

93.25 %, respectively (Table 2). The Q20 and Q30 values of the Hi-C data used in our study were 97.86 % and 91.84 %, respectively (Table 2). These results suggest that the data used in our genome assembly were "high-quality".

**Table 2: Summary of quality control data.**

| Type of library | SRA number  | Raw Base (bp) | Effective Rate (%) | Clean base (bp) | Error rate (%) | Q20 (%) | Q30 (%) | GC Content (%) |
|-----------------|-------------|---------------|--------------------|-----------------|----------------|---------|---------|----------------|
| WGS             | SRR10483520 | 45084213600   | 99.90              | 45036954900     | 0.03           | 96.56   | 93.48   | 44.01          |
| WGS             | SRR10483518 | 44824006500   | 99.90              | 44777152500     | 0.03           | 96.44   | 93.25   | 43.96          |
| WGS             | SRR10483517 | 45752767800   | 99.89              | 45702384600     | 0.03           | 96.59   | 93.56   | 44.05          |
| WGS             | SRR10483516 | 46056473400   | 99.89              | 46005792900     | 0.03           | 96.72   | 93.78   | 44.08          |
| Hi-C            | SRR10483522 | 152176227800  | 98.12              | 149315314800    | 0.04           | 97.86   | 91.84   | 45.12          |

**Comment 1-4:**

*4. For all software, please provide versions and source.*

**Response 1-4:**

Following Reviewer 1's valuable suggestion, we have added the below descriptions to the supplemental materials (see lines 2–63).

**Goose genome assembly, annotation and the spatial organization of chromatin in liver tissues analysis by the following software**

**Goose genome were de novo assembled by the following software:**

- (1) FALCON: version 3.1, parameters: length\_cutoff = 5000 length\_cutoff\_pr = 4500;
- (2) pbsmrtpipe: version smrtlink\_5.0.1, default parameters;
- (3) SSPACE-LongRead: version 1-1, default parameters;
- (4) PBjelly: version PBSuite\_15.8.24, parameters: blasr: -minMatch 8 -minPctIdentity 75 -bestn 1 -nproc 13 -noSplitSubreads;
- (5) pilon: version pilon-1.18, parameters: -Xmx400G --diploid --threads 30;
- (6) Lachesis: version-201701, parameters: RE\_SITE\_SEQ = GATC, CLUSTER\_N = 39, CLUSTER\_MIN\_RE\_SITES = 600, CLUSTER\_MAX\_LINK\_DENSITY = 3, CLUSTER\_NONINFORMATIVE\_RATIO = 0.
- (7) kallisto: version 0.44.0, parameters: -i -o --bias --rf-stranded.

**Goose genome were annotated followed the software:**

- (1) GCE: version1.0.0, parameters: -H 1;

- (2) SOAPdenovo: version2, k-mer size of 59;
- (3) GAPcloser: version1.12, parameters: -l 150 -p 31;
- (4) SSPACE: version3.0, default parameters;
- (5) RepeatMasker: RepeatMasker-open-4-0-6, parameters: -a -nolow -no\_is -norna -parallel 1;
- (6) RepeatModeler: RepeatModeler-open-1.0.11, parameters: -database genome -engine ncbi -pa 15;
- (7) Tandem Repeats Finder: TRF-407b, parameters: 2 7 7 80 10 50 2000 -d -h;
- (8) TBLASTN: blast-2.2.26, parameters: -e 1e-05 -F T -m 8;
- (9) GeneWise: version2.4.1, parameters: -tfor/-trev -genesf -gff;
- (10) Augustus: version3.2.3, parameters: -uniqueGeneId = true-noInFrameStop = true-gff3 = on-genemodel = complete-strand = both;
- (11) GlimmerHMM: version3.0.1, parameters: -g -f;
- (12) SNAP: snap-2013-11-29, default parameters;
- (13) Trinity: trinityrnaseq-2.1.1, parameters: -seqType fq-CPU 20-max\_memory 200G-normalize\_reads-full\_cleanup-min\_glue 2-min\_kmer\_cov 2-KMER\_SIZE 25;
- (14) PASA: PASA\_r20140417, default parameters;
- (15) InterPro: version29.0, perl-based version4.8, default parameters;
- (16) tRNAscan-SE: tRNAscan-SE-1.3.1, default parameters;
- (17) INFERNAL: version1.1rc4 (June 2013);
- (18) BLASTp: blast-2.2.26, parameters: -p blastn -e 1e-10 -v 10000 -b 10000;
- (19) EVM: VidenceModeler-1.1.1, parameters: -segment-Size 200000-overlapSize 20000;
- (20) Tophat: tophat-2.0.13, parameters: -p 6-max-intron-length 500000 -m 2-library-type fr-unstranded;
- (21) Cufflinks: cufflinks-2.1.1, parameters: -I 500000 -p 1-library-type fr-unstranded -L CUFF;
- (22) BUSCO: version3.0.2, OrthoDBv9\_vertebrata;
- (23) BWA: bwa-0.7.8, parameters: mem -k 32 -w 10 -B 3 -O 11 -E 4 -t 10;
- (24) SAMtools: samtools-0.1.19, parameters: mpileup mpileup -m 2 -u;
- (25) RAxML: version 8.0.19, default parameters;



- (26) CAFÉ: Version 1.6, default parameters;
- (27) BLASTP: Version 2.2.26, default parameters;
- (28) PAML: Version 14.7, default parameters;

**LncRNA and TUCP were annotated followed the software:**

- (1) STAR: version 2.6.0c, default parameters;
- (2) Cufflinks: version 2.2.1, default parameters;
- (3) TACO: version 0.7.3, parameters: --filter-min-expr 0.1 --isoform-frac 0.1 --path-kmax 20 --max-paths 20 --filter-min-length 250 --gtf-expr-attr FPKM;
- (4) taco\_refcomp: part of TACO in version 0.7.3, parameters: -o -r -t
- (5) CPC2: version beta of CPC2, default parameters;
- (6) transeq: parts of EMBOSS in version 6.6.0, parameters: -sequence -outseq -frame 6 -clean;
- (7) kallisto: version 0.44.0, parameters: -i -o --bias --rf-stranded.

**Hi-C data analysis by the following software:**

- (1) Juicer: version 1.8.9, parameters: -C 8000000 -s MboI -p goose.chromosome.sizes -z goose.fa -y goose.MboI.fragment.txt -n 10G;
- (2) Hi-C Domain Caller, pipeline to call domains from Hi-C experiments: <http://chromosome.sdsc.edu/mouse/hi-c/download.html>;
- (3) PSYCHIC: parameters, res: 25000, win: 2000000, chrname: chr\*, chrsize: chr\*.size, output\_prefix: goose.chr\*.25000, output\_dir: output\_directory, input\_matrix: goose.chr\*.25000.normalized.matrix, gene\_file: goose.gene.psychic.bed, skip\_hierarchy: FALSE.

**Comment 1-5:**

*5. LINE 84: k-mer distribution analysis used to estimate genome size - provide reference, software, method - also mention other QC estimates (repeats, polyploidy etc).*

**Response 1-5:**

Thank you for this useful comment. To estimate genome size, repeat regions, heterozygosity, and polyploidy prior to assembling the goose genome, we employed survey software based on K-mer (k = 17) frequency distributions. This predicted the genome size, repeat ratio, and heterozygosity to be 1277.1 Mb, 39.8%, and 0.4%,

respectively. In the K-mer analysis, the goose data demonstrated a distribution typical of a diploid genome (Figure 1), showing only a single major peak—which could be used to estimate the genome size. In addition, the first minor peak represents the level of heterozygosity and the second minor peak represents the level of repeat sequence [3].

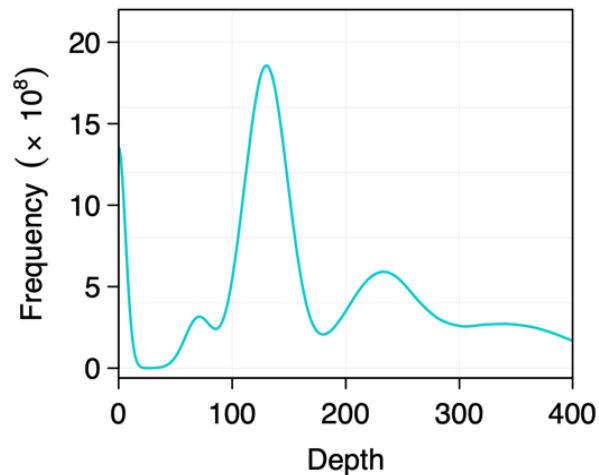

**Figure 1. Frequency distribution of K-mer (17 bp).**

**Comment 1-6:**

6. *LINE 91: Lachesis old software no longer supported - why not used SALSA2 or 3D-DNA?*

**Response 1-6:**

Thank you for raising this important point. Please see Response 1-2 for a discussion of this issue.

**Comment 1-7:**

7. *Figure S1: Hi-C map suggests lots of mis-joins, have you checked and manually corrected?*

**Response 1-7:**

Thank you for this valuable comment. In accordance with this point, we also identified mis-joins in the Hi-C map, which suggests that these regions of the genome might be repetitive, GC-rich, or contain structural variation. As mentioned above, we are committed to assembling a complete and accurate goose genome sequence, and in

future work aim to focus on these “mis-joins” using the latest technologies and corresponding assembly algorithms.

**Comment 1-8:**

*8. LINES 109-111, again used the term "high-quality" for a mix of genomes, Human, Mouse, Chicken probably but duck, turkey and zebra finch are draft and not high-quality genomes.*

**Response 1-8:**

Thank you for this insight. **We have changed “high-quality” to “chromosome-level” in line 109.** As described in Table 1, while the contig N50 values of zebra finch, duck, and turkey are 12.0 Mb, 36.80 Kb, and 27 Kb, respectively, these genomes were assembled into chromosome-level assemblies with the aid of other technologies, such as RH mapping and FISH (Table 1).

**Comment 1-9:**

*9. LINES 114-117, pooled RNAseq used, so how can you quantify gene expression later in paper? Needs deconvolution of pooled samples - was this done? For annotation Pacbio isoseq would be better.*

**Response 1-9:**

RNA-seq prediction is a commonly used method for improving genome annotation, correcting predicted gene structures, detecting new alternative splicing isoforms, and discovering new genes and transcripts. In this updated manuscript, we used data from the pooled RNA-seq analysis (abdominal fat, brain, duodenum, heart, liver, lung, muscular stomach, ovary, pancreas, pectoral muscle, and spleen) only for the annotation of the goose genome and not for gene expression quantification or for the spatial analysis of chromatin organization. Accordingly, we did not perform a deconvolution analysis of the pooled RNA-seq sample.

Nevertheless, we sincerely thank Reviewer 1 for this reminder on the correct usage of pooled RNA-seq data. We have now realized that our pooled RNA-seq data were inaccurately used to explore the spatial organization of chromatin in goose liver tissue.

To address this, we downloaded three RNA-seq datasets from liver tissues (Accession numbers: GSM3374538, GSM3374539, GSM3374540), which had been generated from the same goose strain used in our study [4]. We then quantified gene expression in these three samples and used these results to update all the content related to gene expression in our study, in terms of compartments and promoter-enhancer interactions. We have revised the main text and Figures S7–S11 and Figure 2 accordingly.

Regarding Pacbio, we also thank Reviewer 1 for raising this point. Certainly, the long reads from the Pacbio isoseq platform could better annotate complete transcripts in genomes. We aim to adopt this method, and other newly developed methods, when we update the quality of the goose genome assembly or annotation in future work.

**Comment 1-10:**

*10. Prediction of lncRNAs from assembly of short read RNA-seq is known to be poor, so LINES 121-124, where 3,287 lncRNAs are predicted needs to be taken with caution.*

**Response 1-10:**

Thank you for this valuable suggestion. We agree that longer reads from PacBio and ONT offer advantages for resolving complex features in transcriptomes when compared to short read RNA-seq. For example, read length is the major advantage of Iso-Seq cDNA transcript sequencing and Oxford Nanopore direct RNA-seq, which can both capture entire transcripts.

Compared with mRNAs, which can be annotated by a combination of *ab initio* and homologous assembly approaches, lncRNAs are not conserved among species. lncRNAs can thus only be identified by transcript data, without the aid of homology. Long reads can be helpful for the identification and annotation of lncRNAs, and in future work, we will adopt this strategy. In this study, we identified lncRNAs by analyzing the transcript data from *short read RNA-seq* only, and **we have clarified this point in lines 124–127 of the main text.**

**Comment 1-11:**

11. LINE 160, goose and duck diverged 32 Mya, how does this estimate compare with other data sources?

**Response 1-11:**

Thank you for this important comment. In this study, we first downloaded the reported divergence times between each pair of species (e.g. chicken and turkey) from the TimeTree website (<http://www.timetree.org/>). These divergence times are estimated on the basis of single-copy gene families via a Bayesian algorithm called mcmctree, within the software “PAML (<http://abacus.gene.ucl.ac.uk/software/paml.html>)”. We also used well-established divergence times to further adjust the estimated divergence times of other species and improve the accuracy of our results. The divergence times predicted in our study were consistent with two previous reports: 20.8 (12.9-32.7) Mya in Lu et al. [5]; and 30.0 (21.4-38.6) Mya in Gao et al. [6].

**Comment 1-12:**

12. sections (b-d) interesting predictions from phylogenetic analyses, but all speculation, there is no other data provided to back up these predictions.

**Response 1-12:**

Thank you for raising this point. The purpose of our article was to supply a valuable resource for future genetic and genomic studies on geese. Accordingly, we endeavored to explore the general characteristics of the goose genome by performing common general analyses—such as the expansion and contraction of gene families, and the identification of genes under positive selection. In the future, experiments on gene function will help to resolve the speculations and predictions we have presented here. **We have revised the main text in lines 171, 191-192 and 198–211 to address this issue.**

**Comment 1-13:**

13. LINE 192, PAML Codeml analysis is crude, and does not correct for multiple testing, with 17K genes tested there is a high false positive rate, was there any correction for multiple testing, if not please correct.

**Response 1-13:**

Thank you for this valuable comment. In our work, only single-copy genes (n = 2389) were used for the identification of genes under positive selection. We did not use all 17K genes. After we calculated the p-value for each of the candidate positively selected genes using PAML, we further adjusted the p-values (e.g. using the Bonferroni method, a method for multiple testing) to reduce false-positive results.

**Comment 1-14:**

*14. LINE 202, the TAD analysis is restricted to liver tissue.*

**Response 1-14:**

Thank you for raising this point. We explored the spatial organization of chromatin and gene expression in goose liver tissue only, with regard to topologically associating domains (TAD). TADs were largely invariable across tissues or species. **We have clarified this point in lines 29, 213, 224, and 229.**

**Comment 1-15:**

*15. LINES 203-204, macs and mics form sub-domains in the nucleus. Figure 4 needs more explanation, poor figure.*

**Response 1-15:**

**We have replotted Figure 4 (named Figure 2 in revised manuscript) and increased the resolution of this figure.** We have also added additional explanation and changed the figure legend as follows: **"Dendrogram of inter-pseudo-chromosome interaction patterns generated by the average linkage algorithm. Heatmap shows the inter-pseudo-chromosome interaction probability, as generated by calculating the observed/expected contact frequencies for chromosome pair i, j. This is overlaid on a histogram showing pseudo-chromosome length, number of protein-coding genes, and GC percentage".**

**Comment 1-16:**

*16. LINE 205, define compartments A and B, how are these defined in Hi-C data?*

**Response 1-16:**

Thank you for this valuable query. We have now added an explanation of the methods used for identifying compartments A and B, as well as the methods for how

the spatial organization of chromatin and gene expression were explored in the goose liver tissues (see [lines 64–92 in the supplemental materials](#)). These methods relate to inter-pseudo-chromosomal interaction patterns, topologically associating domains, promoter-enhancer interactions, and gene expression quantification.

**Comment 1-17:**

*17. LINE 206, how were TSS (transcription start sites, not defined in the set of abbreviations, please add) defined? I assume based on the pooled short read RNA-seq data. If correct, this is a poor data set, since the assembly of transcripts based on short read data only defines the most 5' RNA sequenced. So misses any internal TSS, does not correct for degraded RNA, etc.*

**Response 1-17:**

Thank you for this comment. We agree that basing the definition of TSS sites on short read data would be inaccurate. We apologize for the ambiguous TSS-related description in our manuscript. We have changed the description in line 221 to 223: "[the number of protein-coding genes \(PCGs\) in each 100-Kb bin with at least 50% percentage overlapped with a gene was counted. The number of PCGs was significantly correlated with PC1 values](#)".

**Comment 1-18:**

*18. LINE 213, gene expression levels based on pooled RNAseq data is a very poor dataset, should deconvolute or at least have a high-quality liver RNA set.*

**Response 1-18:**

As described above (see Response 1-9), to address this issue we downloaded three additional RNA-seq datasets that were restricted to liver tissue (Accession numbers: GSM3374538, GSM3374539, GSM3374540). These datasets derive from the same goose strain as used in our study, and on the basis of a new analysis of these data we have updated all the sections of our manuscript related to gene expression. Specifically, we have changed the following description in lines 223–225: "[the transcripts per kilobase millions \(TPMs\) of PCGs located in A compartments were significantly higher than those in B compartments](#)", to: "[the transcripts per kilobase millions \(TPMs\) of](#)

PCGs located in A compartments were consistently higher than PCGs in B compartments in three liver tissues". We have also changed lines 229–230 from: "found that gene expression levels positively correlated with the number of PEIs", to: "found that gene expression levels positively correlated with the number of associated enhancers in all three liver tissues".

## **Reviewer 2**

*The manuscript describes a highly contiguous genome assembly of the goose genome and provides a significant improvement of the assembly of this bird. The results are described very clearly, and the data has been made publicly available. The analyses done are rather straightforward, and much more could have done with the interesting data generated in this study, which to me seems a missed opportunity.*

*The authors decide to sequence an F1 animal that is a cross between *A. anser* and *A. cygnoides*. I wonder why the authors did not use Illumina sequencing to sequence the genome of the two parents. This would have allowed the generation of two haplotype specific assemblies and the Comparison between the genomes of these two different sub-species. Also, no indication is given for the number of variants see in this bird, which would also have provided a good indication of the sequence divergence between these two sub-species. Finally, the realignment of the short-read Illumina sequences, provides a way to estimate the number of sequence errors still present in the final assembly (seen as homozygous SNPs and indels).*

## **Response 2 :**

We apologize, it is apparent that our description of the Tianfu goose used for genome assembly in this study was not clear. Domesticated geese derive from the swan goose (*Anser cygnoides*) and the graylag goose (*Anser anser*). The Tianfu goose is a recognized breed that has originated from crosses between the domestic Landes goose (*A. cygnoides*) and the Sichuan white goose (*A. anser*), rather than the F1 animal crossed between *A. anser* and *A. cygnoides*. The Tianfu goose is a developed breed with many outstanding characteristics, such as excellent egg-laying performance, a fast growth rate, and strong adaptability. These characteristics are why we selected the Tianfu goose for this study.



Until now, a high-quality reference goose genome has not been available. To provide a valuable resource for future genetic and genomic studies on geese, and facilitate related research fields, our manuscript presents the first chromosome-level assembly of the goose genome. With reference to human and mouse research, in future studies we also aim to perform haplotype-resolved genome assemblies of F1 geese and parent animals, and compare differences between breeds.

Regarding the estimation of sequence errors, after we obtained our final goose assembly, we realigned the short read Illumina sequences with BWA software, and called SNPs and InDels using GATK software. As can be seen in Table 3, the proportions of homologous SNPs and InDels identified (which often reflect assembly errors) were extremely low, which indicates that our final assembly is of “high-quality”.

**Table 3: Homologous SNPs and InDels in the goose genome.**

| Category          | Number | Proportion (%) |
|-------------------|--------|----------------|
| Homologous SNPs   | 23,324 | 0.0021         |
| Homologous InDels | 8,726  | 0.00078        |

#### *OTHER POINTS*

##### **Comment 2-1:**

*Figure 1 and figure 2 are not very informative and I suggest moving these to the supplementary information*

##### **Response 2-1:**

We agree with this suggestion from Reviewer 2. We have removed Figure 1 and Figure 4 to the supplementary figures, and have reordered the sequence of the corresponding supplementary figures.

##### **Comment 2-2:**

*Line 89-90: The authors refer to table S1 in relation to the correction of sequencing errors. However, this table does not provide any information about sequencing errors.*

##### **Response 2-2:**

We apologize for this inaccurate description. We have revised the main text to address this error, see lines 87–88.

**Comment 2-3:**

*Line 90-91: The authors refer to table S2 and Fig S1. However, table S2 shows a summary of the pseudo chromosomes, not of the Hi-C scaffolds. Furthermore, in table S1 the authors show that there are 2123 Hi-C scaffolds. Please elaborate and clarify.*

**Response 2-3:**

We regret the error in this description. Indeed, we state the length of the pseudo-chromosomes in the goose genome in Table S2, and present the Hi-C interaction contact heatmap of the pseudo-chromosomes in Figure S3. There are 2123 scaffolds in our goose genome assembly. This includes 68 scaffolds of 200bp to 2000bp, 2016 scaffolds of 2000bp to 350000bp, and 39 pseudo-chromosomes that are greater than 1Mb.

**Comment 2-4:**

*Line 119-121: Again, the reference to the table/figure does not seem to match very well with the information in the text. I also suggest to add the number of PCG's to table 3. Also, does figure 2 only show the TSS for PCG or does it also include those for the lncRNAs.*

**Response 2-4:**

Thank you for this valuable suggestion. Accordingly, **we have added the number of PCGs to Table 3. In Figure 2, we show only the TSSs for PCGs. We have redrawn Figure 2.**

**Comment 2-5:**

*Line 128: I am confused by the comment that the current assembly has more scaffolds. Given that the assembly is improved with higher N50 values for the contigs and scaffolds, I would assume that the number would be smaller.*

**Response 2-5:**

Thank you for raising this point. To display the quality of the genome assemblies, we analyzed the distribution of their scaffold lengths. In our goose genome, with the exception of the 39 pseudo-chromosomes, lengths of scaffolds are distributed from 2kb

to 350kb (Table 4). This indicates that our assembly contains 39 pseudo-chromosomes (longer than 1Mb) and 2016 scaffolds (of lengths ranging from 2kb to 350kb). To supply more information for researchers, we did not filter the 2kb–350kb scaffolds from our genome assembly data. As a result, we have reported more scaffolds in this study than were reported in two previous studies. However, as the 39 pseudo-chromosomes we assembled account for 88.36% of the genome (Table 4, Figure 2), this suggests that our genome assembly is an improvement on previous goose assemblies.

**Table 4: Comparison of the distribution of scaffold lengths in three goose genomes.**

| Scaffold length | This study |                |              | Lu <i>et al</i> <sup>a</sup> |                |              | Gao <i>et al</i> <sup>b</sup> |                |              |
|-----------------|------------|----------------|--------------|------------------------------|----------------|--------------|-------------------------------|----------------|--------------|
|                 | Number     | Percentage (%) | Coverage (%) | Number                       | Percentage (%) | Coverage (%) | Number                        | Percentage (%) | Coverage (%) |
| 2Kb-50Kb        | 1192       | 58.00          | 2.09         | 537                          | 51.14          | 0.52         | 1174                          | 63.91          | 1.32         |
| 50Kb-100Kb      | 349        | 16.98          | 2.24         | 54                           | 5.14           | 0.34         | 133                           | 7.24           | 0.85         |
| 100Kb-150Kb     | 200        | 9.73           | 2.21         | 25                           | 2.38           | 0.28         | 59                            | 3.21           | 0.64         |
| 150Kb-2000Kb    | 134        | 6.52           | 2.09         | 30                           | 2.86           | 0.47         | 24                            | 1.31           | 0.39         |
| 200Kb-250Kb     | 96         | 4.67           | 1.90         | 26                           | 2.48           | 0.52         | 20                            | 1.09           | 0.41         |
| 250Kb-300Kb     | 40         | 1.95           | 0.96         | 15                           | 1.43           | 0.36         | 26                            | 1.42           | 0.64         |
| 300Kb-350Kb     | 5          | 0.24           | 0.14         | 16                           | 1.52           | 0.46         | 15                            | 0.82           | 0.43         |
| 350Kb-400Kb     | 0          | 0              | 0            | 12                           | 1.14           | 0.40         | 15                            | 0.82           | 0.49         |
| 400Kb-450Kb     | 0          | 0              | 0            | 11                           | 1.05           | 0.42         | 16                            | 0.87           | 0.61         |
| 450Kb-500Kb     | 0          | 0              | 0            | 8                            | 0.76           | 0.34         | 8                             | 0.44           | 0.34         |
| 500Kb-550Kb     | 0          | 0              | 0            | 7                            | 0.67           | 0.33         | 10                            | 0.54           | 0.47         |
| 550Kb-600Kb     | 0          | 0              | 0            | 10                           | 0.95           | 0.51         | 14                            | 0.76           | 0.73         |
| 600Kb-650Kb     | 0          | 0              | 0            | 6                            | 0.57           | 0.34         | 17                            | 0.93           | 0.95         |
| 650Kb-700Kb     | 0          | 0              | 0            | 9                            | 0.86           | 0.55         | 5                             | 0.27           | 0.31         |
| 700Kb-750Kb     | 0          | 0              | 0            | 4                            | 0.38           | 0.26         | 13                            | 0.71           | 0.85         |
| 750Kb-800Kb     | 0          | 0              | 0            | 7                            | 0.67           | 0.49         | 8                             | 0.44           | 0.56         |
| 800Kb-850Kb     | 0          | 0              | 0            | 5                            | 0.48           | 0.37         | 4                             | 0.22           | 0.29         |
| 850Kb-900Kb     | 0          | 0              | 0            | 1                            | 0.10           | 0.08         | 6                             | 0.33           | 0.47         |
| 900Kb-950Kb     | 0          | 0              | 0            | 4                            | 0.38           | 0.33         | 7                             | 0.38           | 0.58         |
| 950Kb-1000Kb    | 0          | 0              | 0            | 4                            | 0.38           | 0.34         | 7                             | 0.38           | 0.61         |
| > 1000Kb        | 39         | 1.90           | 88.36        | 259                          | 24.67          | 92.43        | 256                           | 13.94          | 89.56        |

<sup>a</sup>From the ref. 5. <sup>b</sup>From the ref. 6.

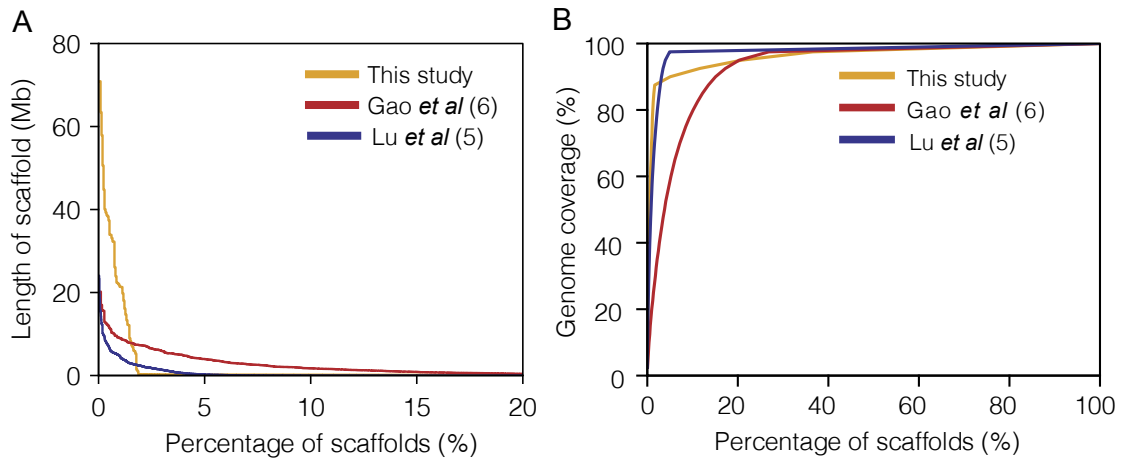

**Figure 2. Comparison of the distribution and coverage of scaffolds with previous goose genome assemblies.**

**Comment 2-6:**

*Line 129-131: This statement is not supported by table 3. In fact, the other studies seem to have annotated more gene sequences than the current assembly.*

**Response 2-6:**

Thank you for this useful comment. In this study, we annotated more repeat regions (8.67%) (Table S3) and exon sequence regions (26,883,354bp, 2.41%) (Table 3) than in previous studies (Table 3). This suggests that we have generated an improved genome assembly and annotation. **We have revised lines 132–133 of the manuscript to address this point.**

**Comment 2-7:**

*Line 195-196: "... indicating that disease resistance may help .....". I don't think this statement is supported by the results and tends to be mere story telling.*

**Response 2-7:**

Thank you for identifying this issue. In lines 198–211, we have revised the original text as follows: **“Some of these PSGs, such as *GCHI* (GTP-cyclohydrolase I), are associated with parkinsonism, dystonia, and phenylketonuria disease in humans [7, 8]. They also play a role in adaptation to high-altitude environments in humans, where they relate to a lower hemoglobin level, nitric oxide concentration, and oxygen saturation in the blood. Furthermore, previous studies have shown *GCHI* divergence between**

human populations living at different altitudes [9]. Selection acting on *GCHI* in goose is likely to be related to their adaption to high-altitude or migratory habitats. *SNWI* (SNW1 Domain Containing 1) is involved in the Nuclear Factor Kappa B pathway and is associated with oculopharyngeal muscular dystrophy disease [10, 11]. The depletion of this gene in breast cells leads to the induction of apoptosis, while the overexpression of this gene impedes neural crest development [12]. Selection acting on *SNWI* in goose suggests that it may confer protection from diseases and aid adaptation in changeable environments. *POU2F3* is pivotal in the discrimination of taste qualities, such as sweet, umami and bitter characteristics. Deficiency in this gene in mice alters their electrophysiology and behavioral responses to taste characters [13, 14]. Selection acting on *POU2F3* in goose is likely to be related to a requirement for seeking food in variable migratory habitats.”

## References

1. Burton JN, Adey A, Patwardhan RP, Qiu R, Kitzman JO, Shendure J. Chromosome-scale scaffolding of *de novo* genome assemblies based on chromatin interactions. *Nat Biotechnol.* 2013; 31(12): 1119-1125.
2. Ghurye J, Rhie A, Walenz BP, et al. Integrating Hi-C links with assembly graphs for chromosome-scale assembly. *PLoS Comput Biol.* 2019; 15(8): e1007273.
3. Liu B, Shi Y, Yuan J, et al. Estimation of genomic characteristics by analyzing k-mer frequency in *de novo* genome projects. 2013.
4. Wang G, Jin L, Li Y, et al. Transcriptomic analysis between Normal and high-intake feeding geese provides insight into adipose deposition and susceptibility to fatty liver in migratory birds. *BMC Genomics.* 2019; 20(1): 372.
5. Lu L, Chen Y, Wang Z, et al. The goose genome sequence leads to insights into the evolution of waterfowl and susceptibility to fatty liver. *Genome Biol.* 2015; 16(1): 89.

6. Gao G, Zhao X, Li Q, et al. Genome and metagenome analyses reveal adaptive evolution of the host and interaction with the gut microbiota in the goose. *Sci Rep*. 2016; 6: 32961.
7. Yoshino H, Nishioka K, Li Y, et al. GCH1 mutations in dopa-responsive dystonia and Parkinson's disease. *J Neurol*. 2018; 265(8): 1860-1870.
8. Gu Y, Lu K, Yang G, et al. Mutation spectrum of six genes in Chinese phenylketonuria patients obtained through next-generation sequencing. *PLoS One*. 2014; 9(4): e94100.
9. Guo YB, He YX, Cui CY, et al. GCH1 plays a role in the high-altitude adaptation of Tibetans. *Zool Res*. 2017; 38(3): 155-162.
10. Verma S, De Jesus P, Chanda SK, Verma IM. SNW1, a Novel Transcriptional Regulator of the NF- $\kappa$ B Pathway. *Mol Cell Biol*. 2019; 39(3): e00415-18.
11. Tolde O, Folk P. Stress-induced expression of p53 target genes is insensitive to SNW1/SKIP downregulation. *Cell Mol Biol Lett*. 2011; 16(3): 373-384.
12. Wu MY, Ramel MC, Howell M, Hill CS. SNW1 is a critical regulator of spatial BMP activity, neural plate border formation, and neural crest specification in vertebrate embryos. *PLoS Biol*. 2011; 9(2): e1000593.
13. Huang YH, Klingbeil O, He XY, et al. POU2F3 is a master regulator of a tuft cell-like variant of small cell lung cancer. *Genes Dev*. 2018; 32(13-14): 915-928.
14. Matsumoto I, Ohmoto M, Narukawa M, Yoshihara Y, Abe K. Skn-1a (Pou2f3) specifies taste receptor cell lineage. *Nat Neurosci*. 2011; 14(6): 685-687.
