# Supplementary material for: Pacific Biosciences assembly with Hi-C mapping generates an improved, chromosome-level goose genome
Source: PubMed Central journal article supplement (PMC7585555; doi:10.1093/gigascience/giaa114), 2020-10-24
Supplement: giaa114_response_to_reviewer_comments_original_submission.pdf [file giaa114_response_to_reviewer_comments_original_submission.pdf]

## Author's Response To Reviewer Comments

Close

### Detailed responses to Reviewers

Below, all critiques and suggestions provided by the reviewers are cited in gray italics; our responses are in black. In red and blue, descriptions within the responses that indicate changes in the manuscript. Moreover, all revisions in the manuscript are marked in red.

#### Reviewer 1

This paper reports on the assembly and annotation of the Tianfu goose genome, a female hybrid of *A. anser* x *A. cygnoides*. This assembly is a significant improvement on earlier genomes, which were based on short read technologies. This assembly is based on three technologies: short reads, long reads and HiC maps.

Comment 1:

#### MAJOR POINTS

1. The assignment of 39 chromosomes to Hi-C scaffolds is very tentative and needs to be validated. For larger scaffold you need to establish homology e.g. with chicken chromosomes, which have extensive FISH/cytogenetic data at least for the macrochromosomes. The smaller scaffolds in the HiC analysis could be parts of larger chromosomes - the HiC map suggests mis-joins. Also in other genome projects very GC-rich, repeat-rich chromosomes (such as microchromosomes) are difficult to sequence, and are missing from the assembly. So 39 pseudo-chromosomes are found but these do not equal 39 physical chromosomes. This affects conclusions on chromosome number, genome completeness, gene density distribution and distribution of TADs, etc. As a reference goose genome these points need to be addressed.

Response 1 :

Thank you for this valuable suggestion. We recognize the importance of a reference genome that comprises accurate, physical chromosomes for future genetic and genomic studies on geese. In this study, we generated a 1.11 Gb goose genome with contig N50 and scaffold N50 values of 1.85 Mb and 33.12 Mb, respectively (Table 1). Our assembly contains 39 pseudo-chromosomes (78), which account for 88.36% of the goose genome; it is a draft goose genome assembly rather than a complete assembly of physical chromosomes. As far as we know, this genome is comparable with other chromosome-level avian genome assemblies (Table 1). (The tables and figures were accessible from Response\_sup.pdf at: [https://fnca1-my.sharepoint.com/:b:/g/personal/guanglianggaocq\\_lwh\\_world/EQSVOZIBk9HlaxEnZFufdcBf\\_eOaki7d4jJkNUz9Yrwpw?e](https://fnca1-my.sharepoint.com/:b:/g/personal/guanglianggaocq_lwh_world/EQSVOZIBk9HlaxEnZFufdcBf_eOaki7d4jJkNUz9Yrwpw?e)) We regret that our original description implied a complete genome assembly of 39 chromosomes. We have corrected this by stating throughout the manuscript that our assembly is a chromosome-level goose genome assembly comprising 39 pseudo-chromosomes.

#### OTHER POINTS

Comment 1-1:

1. This is a chromosome-level assembly make this clear in the text.

Response 1-1:

In accordance with Reviewer 1's suggestion, we have clarified that it is a chromosome-level assembly throughout the manuscript.

Comment 1-2:

2. The hybrid approach used here is good but this is a rapidly evolving field, and is already superseded by technology (PacBio now so polishing using short reads not needed) and software (e.g. Lachesis no longer supported).

Response 1-2:

Thank you for this valuable insight. Certainly, de novo whole-genome assembly approaches change over time, and algorithms adapt in line with evolving sequencing technologies. This allows researchers to generate more continuous, complete, and accurate genome assemblies. To facilitate genomic, genetic, and breeding studies on the goose, we report here an improved, chromosome-level goose genome for the scientific community. We expect that our current goose assembly and annotation will be helpful for researchers in different study fields. Furthermore, we remain committed to assembling a complete and accurate goose genome sequence in the future. For this purpose, we plan to adopt the PacBio HiFi and PacBio isoseq technologies, and combine them with extensive FISH and cytogenetic experiments, and genetic map data.

Regarding the three software packages, LACHESIS, SALSA2, and 3D-DNA, each have advantages and limitations for de novo genome assembly. Namely, (1) while we employed the LACHESIS software to combine shotgun fragments and short jump-pair sequences with Hi-C data (to generate chromosome-scale de novo genome assemblies), LACHESIS has limitations when assembling polyploid genomes [1]. (2) The SALSA2 algorithm does not require that the number of chromosomes are set in advance, which improves the accuracy of scaffolds to a certain extent; however, this algorithm can introduce many clustering/sorting/orientation errors, and few parameters can be adjusted during operation [2]. (3) 3D-DNA corrects errors

input assembly and then iteratively orients and orders contigs into a single mega-scaffold. This mega-scaffold is then broken into chromosomes. Chromosomal ends are identified based on a Hi-C contact map. A drawback is that the error correction function in this software has not been well applied; in the case of simulated data, the assembly error rate of 3D-DNA is 2–4 times that of SALSA2 [2]. To choose an appropriate software for our genome assembly, we randomly selected a subset of our Hi-C data and performed a de novo genome assembly using SALSA2, 3D-DNA, and LACHESIS. As the quality metrics of the LACHESIS genome assembly were the best, we performed the subsequent studies in this paper with the LACHESIS software.

Comment 1-3:

3. The phrase "high-quality" is used throughout the text but not defined - so please define. It is more likely that sequence data was generated (provide QC data on quality) and then software is used to filter out poor data, to leave high-quality data for assembly.  
Response 1-3

Thank you for this useful insight. In our manuscript, the phrase "high-quality" refers to data that was filtered from three sequencing platforms and used for the genome assembly. For the short reads, we employed a Perl script written by our lab to filter the data from the Illumina platform. As a result, the Q20 and Q30 values of the whole genome sequencing data from the Illumina platform were greater than 96.44 % and 93.25 %, respectively (Table 2). (accessible from Response\_sup.pdf at: [https://my.sharepoint.com/:b:/g/personal/guanglianggaocq\\_lwh\\_world/EQSV0ZIBk9HlaxEnZFufdcBf\\_eOaki7d4jKNUz9Yrwpw?e](https://my.sharepoint.com/:b:/g/personal/guanglianggaocq_lwh_world/EQSV0ZIBk9HlaxEnZFufdcBf_eOaki7d4jKNUz9Yrwpw?e)) The Q20 and Q30 values of the Hi-C data used in our study were 97.86 % and 91.84 %, respectively (Table 2). These results suggest that the data used in our genome assembly were "high-quality".

Comment 1-4:

4. For all software, please provide versions and source.

Response 1-4:

Following Reviewer 1's valuable suggestion, we have added the below descriptions to the supplemental materials (see line 100-105) for the Goose genome assembly, annotation and the spatial organization of chromatin in liver tissues analysis by the following software:

Goose genome were de novo assembled by the following software:

- (1) FALCON: version 3.1, parameters: length\_cutoff = 5000 length\_cutoff\_pr = 4500;
- (2) pbsmrtpipe: version smrtlink\_5.0.1, default parameters;
- (3) SSPACE-LongRead: version 1-1, default parameters;
- (4) PBjelly: version PBSuite\_15.8.24, parameters: blasr: -minMatch 8 -minPctIdentity 75 -bestn 1 -nproc 13 -noSplitSubreads;
- (5) pilon: version pilon-1.18, parameters: -Xmx400G --diploid --threads 30;
- (6) Lachesis: version-201701, parameters: RE\_SITE\_SEQ = GATC, CLUSTER\_N = 39, CLUSTER\_MIN\_RE\_SITES = 600, CLUSTER\_MAX\_LINK\_DENSITY = 3, CLUSTER\_NONINFORMATIVE\_RATIO = 0.
- (7) kallisto: version 0.44.0, parameters: -i -o --bias --rf-stranded.

Goose genome were annotated followed the software:

- (1) GCE: version1.0.0, parameters: -H 1;
- (2) SOAPdenovo: version2, k-mer size of 59;
- (3) GAPcloser: version1.12, parameters: -l 150 -p 31;
- (4) SSPACE: version3.0, default parameters;
- (5) RepeatMasker: RepeatMasker-open-4-0-6, parameters: -a -nolow -no\_is -norna -parallel 1;
- (6) RepeatModeler: RepeatModeler-open-1.0.11, parameters: -database genome -engine ncbi -pa 15;
- (7) Tandem Repeats Finder: TRF-407b, parameters: 2 7 7 80 10 50 2000 -d -h;
- (8) TBLASTN: blast-2.2.26, parameters: -e 1e-05 -F T -m 8;
- (9) GeneWise: version2.4.1, parameters: -tfor/-trev -genesf -gff;
- (10) Augustus: version3.2.3, parameters: -uniqueGeneId = true-noInFrameStop = true-gff3 = on-genermodel = complete-strand = both;
- (11) GlimmerHMM: version3.0.1, parameters: -g -f;
- (12) SNAP: snap-2013-11-29, default parameters;
- (13) Trinity: trinityrnaseq-2.1.1, parameters: -seqType fq-CPU 20-max\_memory 200G-normalize\_reads-full\_cleanup-m 2-min\_kmer\_cov 2-KMER\_SIZE 25;
- (14) PASA: PASA\_r20140417, default parameters;
- (15) InterPro: version29.0, perl-based version4.8, default parameters;
- (16) tRNAscan-SE: tRNAscan-SE-1.3.1, default parameters;
- (17) INFERNAL: version1.1rc4 (June 2013);
- (18) BLASTp: blast-2.2.26, parameters: -p blastn -e 1e-10 -v 10000 -b 10000;
- (19) EVM: VidenceModeler-1.1.1, parameters: -segment- Size 200000-overlapSize 20000;
- (20) Tophat: tophat-2.0.13, parameters: -p 6-max-intron-length 500000 -m 2- library-type fr-unstranded;
- (21) Cufflinks: cufflinks-2.1.1, parameters: -l 500000 -p 1-library-type fr-unstranded -L CUFF;
- (22) BUSCO: version3.0.2, OrthoDBv9\_vertabrata;
- (23) BWA: bwa-0.7.8, parameters: mem -k 32 -w 10 -B 3 -O 11 -E 4 -t 10;
- (24) SAMtools: samtools-0.1.19, parameters: mpileup mpileup -m 2 -u;
- (25) RAXML: version 8.0.19, default parameters;
- (26) CAFÉ: Version 1.6, default parameters;

(27) BLASTP: Version 2.2.26, default parameters;

(28) PAML: Version 14.7, default parameters;

LncRNA and TUCP were annotated followed the software:

(1) STAR: version 2.6.0c, default parameters;

(2) Cufflinks: version 2.2.1, default parameters;

(3) TACO: version 0.7.3, parameters: --filter-min-expr 0.1 --isoform-frac 0.1 --path-kmax 20 --max-paths 20 --filter-min 250 --gtf-expr-attr FPKM;

(4) taco\_refcomp: part of TACO in version 0.7.3, parameters: -o -r -t

(5) CPC2: version beta of CPC2, default parameters;

(6) transeq: parts of EMBOSS in version 6.6.0, parameters: -sequence -outseq -frame 6 -clean;

(7) kallisto: version 0.44.0, parameters: -i -o --bias --rf-stranded.

Hi-C data analysis by the following software:

(1) Juicer: version 1.8.9, parameters: -C 8000000 -s MboI -p goose.chromosome.sizes -z goose.fa -y goose.MboI.fragments 10G;

(2) Hi-C Domain Caller, pipeline to call domains from Hi-C experiments: <http://chromosome.sdsc.edu/mouse/hi-c/download>

(3) PSYCHIC: parameters, res: 25000, win: 2000000, chrname: chr\*, chrsize: chr\*.size, output\_prefix: goose.chr\*.25000, output\_dir: output\_directory, input\_matrix: goose.chr\*.25000.normalized.matrix, gene\_file: goose.gene.psychic.bed, skip\_hierarchy: FALSE.

Comment 1-5:

5. LINE 84: k-mer distribution analysis used to estimate genome size - provide reference, software, method - also mention QC estimates (repeats, polyploidy etc).

Response 1-5:

Thank you for this useful comment. To estimate genome size, repeat regions, heterozygosity, and polyploidy prior to assemble the goose genome, we employed survey software based on K-mer ( $k = 17$ ) frequency distributions. This predicted the genome size, repeat ratio, and heterozygosity to be 1277.1 Mb, 39.8%, and 0.4%, respectively. In the K-mer analysis, the goose genome demonstrated a distribution typical of a diploid genome (Figure 1), (accessible from Response\_sup.pdf at: [https://fnca1-my.sharepoint.com/:b:/g/personal/guanglianggaocq\\_lwh\\_world/EQSV0Z1BkJ9HlaxEnZFufdcBf\\_eOaki7d4jKNUz9Yrwpw?e](https://fnca1-my.sharepoint.com/:b:/g/personal/guanglianggaocq_lwh_world/EQSV0Z1BkJ9HlaxEnZFufdcBf_eOaki7d4jKNUz9Yrwpw?e)) showing only a single major peak—which could be used to estimate the genome size. In addition, the first minor peak represents the level of heterozygosity and the second minor peak represents the level of repeat sequence [3].

Comment 1-6:

6. LINE 91: Lachesis old software no longer supported - why not used SALSA2 or 3D-DNA?

Response 1-6:

Thank you for raising this important point. Please see Response 1-2 for a discussion of this issue.

Comment 1-7:

7. Figure S1: Hi-C map suggests lots of mis-joins, have you checked and manually corrected?

Response 1-7:

Thank you for this valuable comment. In accordance with this point, we also identified mis-joins in the Hi-C map, which suggest that these regions of the genome might be repetitive, GC-rich, or contain structural variation. As mentioned above, we are committed to assembling a complete and accurate goose genome sequence, and in future work aim to focus on these "mis-joins" using the latest technologies and corresponding assembly algorithms.

Comment 1-8:

8. LINES 109-111, again used the term "high-quality" for a mix of genomes, Human, Mouse, Chicken probably but duck, turkey and zebra finch are draft and not high-quality genomes.

Response 1-8:

Thank you for this insight. We have changed "high-quality" to "chromosome-level" in line 109. As described in Table 1, with contig N50 values of zebra finch, duck, and turkey are 12.0 Mb, 36.80 Kb, and 27 Kb, respectively, these genomes were assembled into chromosome-level assemblies with the aid of other technologies, such as RH mapping and FISH (Table 1).

Comment 1-9:

9. LINES 114-117, pooled RNAseq used, so how can you quantify gene expression later in paper? Needs deconvolution of pooled samples - was this done? For annotation Pacbio isoseq would be better.

Response 1-9:

RNA-seq prediction is a commonly used method for improving genome annotation, correcting predicted gene structures, discovering new alternative splicing isoforms, and discovering new genes and transcripts. In this updated manuscript, we used data from pooled RNA-seq analysis (abdominal fat, brain, duodenum, heart, liver, lung, muscular stomach, ovary, pancreas, pectoral muscle, and spleen) only for the annotation of the goose genome and not for gene expression quantification or for the spatial analysis of chromatin organization. Accordingly, we did not perform a deconvolution analysis of the pooled RNA-seq sample. Nevertheless, we sincerely thank Reviewer 1 for this reminder on the correct usage of pooled RNA-seq data. We have now

that our pooled RNA-seq data were inaccurately used to explore the spatial organization of chromatin in goose liver tissue. To address this, we downloaded three RNA-seq datasets from liver tissues (Accession numbers: GSM3374538, GSM3374539, GSM3374540), which had been generated from the same goose strain used in our study [4]. We then quantified gene expression in these three samples and used these results to update all the content related to gene expression in our study, in terms of compartments and promoter-enhancer interactions. We have revised the main text and Figures S7–S11 and Figure 2 accordingly. Regarding PacBio, we also thank Reviewer 1 for raising this point. Certainly, the long reads from the PacBio Iso-seq platform can better annotate complete transcripts in genomes. We aim to adopt this method, and other newly developed methods, when we update the quality of the goose genome assembly or annotation in future work.

Comment 1-10:

10. Prediction of lncRNAs from assembly of short read RNA-seq is known to be poor, so LINES 121-124, where 3,287 lncRNAs were predicted needs to be taken with caution.

Response 1-10:

Thank you for this valuable suggestion. We agree that longer reads from PacBio and ONT offer advantages for resolving complex features in transcriptomes when compared to short read RNA-seq. For example, read length is the major advantage of Iso-seq, cDNA transcript sequencing and Oxford Nanopore direct RNA-seq, which can both capture entire transcripts. Compared with mRNAs, which can be annotated by a combination of ab initio and homologous assembly approaches, lncRNAs are not conserved among species. lncRNAs can thus only be identified by transcript data, without the aid of homology. Long reads can be helpful for the identification and annotation of lncRNAs, and in future work, we will adopt this strategy. In this study, we identified lncRNAs by analyzing the transcript data from short read RNA-seq only, and we have clarified this point in lines 121–124 of the main text.

Comment 1-11:

11. LINE 160, goose and duck diverged 32 Mya, how does this estimate compare with other data sources?

Response 1-11:

Thank you for this important comment. In this study, we first downloaded the reported divergence times between each pair of species (e.g. chicken and turkey) from the TimeTree website (<http://www.timetree.org/>). These divergence times are estimated on the basis of single-copy gene families via a Bayesian algorithm called mcmctree, within the software "PAML" (<http://abacus.gene.ucl.ac.uk/software/paml.html>). We also used well-established divergence times to further adjust the estimated divergence times of other species and improve the accuracy of our results. The divergence times predicted in our study were consistent with two previous reports: 20.8 (12.9-32.7) Mya in Lu et al. [5]; and 30.0 (21.4-38.6) Mya in Gao et al. [6].

Comment 1-12:

12. sections (b-d) interesting predictions from phylogenetic analyses, but all speculation, there is no other data provided to support these predictions.

Response 1-12:

Thank you for raising this point. The purpose of our article was to supply a valuable resource for future genetic and genomic studies on geese. Accordingly, we endeavored to explore the general characteristics of the goose genome by performing comparative general analyses—such as the expansion and contraction of gene families, and the identification of genes under positive selection. In the future, experiments on gene function will help to resolve the speculations and predictions we have presented here. We have revised the main text in lines 171, 191-192 and 198–211 to address this issue.

Comment 1-13:

13. LINE 192, PAML Codeml analysis is crude, and does not correct for multiple testing, with 17K genes tested there is a high false positive rate, was there any correction for multiple testing, if not please correct.

Response 1-13:

Thank you for this valuable comment. In our work, only single-copy genes ( $n = 2389$ ) were used for the identification of genes under positive selection. We did not use all 17K genes. After we calculated the p-value for each of the candidate positively selected genes using PAML, we further adjusted the p-values (e.g. using the Bonferroni method, a method for multiple testing) to reduce the false-positive results.

Comment 1-14:

14. LINE 202, the TAD analysis is restricted to liver tissue.

Response 1-14:

Thank you for raising this point. We explored the spatial organization of chromatin and gene expression in goose liver tissue with regard to topologically associating domains (TAD). TADs were largely invariable across tissues or species. We have clarified this point in lines 29, 213, 224, and 229.

Comment 1-15:

15. LINES 203-204, macs and mics form sub-domains in the nucleus. Figure 4 needs more explanation, poor figure.

Response 1-15:

We have replotted Figure 4 (named Figure 2 in revised manuscript) and increased the resolution of this figure. We have added

additional explanation and changed the figure legend as follows: "Dendrogram of inter-pseudo-chromosome interaction probability generated by the average linkage algorithm. Heatmap shows the inter-pseudo-chromosome interaction probability, as generated by calculating the observed/expected contact frequencies for chromosome pair  $i, j$ . This is overlaid on a histogram showing the distribution of chromosome length, number of protein-coding genes, and GC percentage".

Comment 1-16:

16. LINE 205, define compartments A and B, how are these defined in Hi-C data?

Response 1-16:

Thank you for this valuable query. We have now added an explanation of the methods used for identifying compartments A and B as well as the methods for how the spatial organization of chromatin and gene expression were explored in the goose liver (see lines 64–92 in the supplemental materials). These methods relate to inter-pseudo-chromosomal interaction patterns, topologically associating domains, promoter-enhancer interactions, and gene expression quantification.

Comment 1-17:

17. LINE 206, how were TSS (transcription start sites, not defined in the set of abbreviations, please add) defined? I assume on the pooled short read RNA-seq data. If correct, this is a poor data set, since the assembly of transcripts based on short read data only defines the most 5' RNA sequenced. So misses any internal TSS, does not correct for degraded RNA, etc.

Response 1-17:

Thank you for this comment. We agree that basing the definition of TSS sites on short read data would be inaccurate. We have updated the ambiguous TSS-related description in our manuscript. We have changed the description in line 221 to 223: "the number of protein-coding genes (PCGs) in each 100-Kb bin with at least 50% percentage overlapped with a gene was counted. The number of PCGs was significantly correlated with PC1 values".

Comment 1-18:

18. LINE 213, gene expression levels based on pooled RNAseq data is a very poor dataset, should deconvolute or at least use a high-quality liver RNA set.

Response 1-18:

As described above (see Response 1-9), to address this issue we downloaded three additional RNA-seq datasets that were restricted to liver tissue (Accession numbers: GSM3374538, GSM3374539, GSM3374540). These datasets derive from the same goose strain as used in our study, and on the basis of a new analysis of these data we have updated all the sections of our manuscript related to gene expression. Specifically, we have changed the following description in lines 223–225: "the transcripts per kilobase millions (TPMs) of PCGs located in A compartments were significantly higher than those in B compartments", to "transcripts per kilobase millions (TPMs) of PCGs located in A compartments were consistently higher than PCGs in B compartments in three liver tissues". We have also changed lines 229–230 from: "found that gene expression levels positively correlated with the number of PEIs", to: "found that gene expression levels positively correlated with the number of associated enhancers in three liver tissues".

Reviewer 2

The manuscript describes a highly contiguous genome assembly of the goose genome and provides a significant improvement over the assembly of this bird. The results are described very clearly, and the data has been made publicly available. The analyses are rather straightforward, and much more could have been done with the interesting data generated in this study, which is a missed opportunity.

The authors decide to sequence an F1 animal that is a cross between *A. anser* and *A. cygnoides*. I wonder why the authors did not use Illumina sequencing to sequence the genome of the two parents. This would have allowed the generation of two haplotype-specific assemblies and the comparison between the genomes of these two different sub-species. Also, no indication is given of the number of variants seen in this bird, which would also have provided a good indication of the sequence divergence between these two sub-species. Finally, the realignment of the short-read Illumina sequences, provides a way to estimate the number of sequence errors still present in the final assembly (seen as homozygous SNPs and indels).

Response 2 :

We apologize, it is apparent that our description of the Tianfu goose used for genome assembly in this study was not clear. Domesticated geese derive from the swan goose (*Anser cygnoides*) and the graylag goose (*Anser anser*). The Tianfu goose is a recognized breed that has originated from crosses between the domestic Landes goose (*A. cygnoides*) and the Sichuan white goose (*A. anser*), rather than the F1 animal crossed between *A. anser* and *A. cygnoides*. The Tianfu goose is a developed breed with many outstanding characteristics, such as excellent egg-laying performance, a fast growth rate, and strong adaptability. These characteristics are why we selected the Tianfu goose for this study.

Until now, a high-quality reference goose genome has not been available. To provide a valuable resource for future genetic and genomic studies on geese, and facilitate related research fields, our manuscript presents the first chromosome-level assembly of the goose genome. With reference to human and mouse research, in future studies we also aim to perform haplotype-resolved genome assemblies of F1 geese and parent animals, and compare differences between breeds.

Regarding the estimation of sequence errors, after we obtained our final goose assembly, we realigned the short read Illumina sequences with BWA software, and called SNPs and InDels using GATK software. As can be seen in Table 3, the proportion of non-homologous SNPs and InDels identified (which often reflect assembly errors) were extremely low, which indicates that our

assembly is of "high-quality".

Table 3: Homologous SNPs and InDels in the goose genome.

| Category          | Number | Proportion (%) |
|-------------------|--------|----------------|
| Homologous SNPs   | 23,324 | 0.0021         |
| Homologous InDels | 8,726  | 0.00078        |

#### OTHER POINTS

Comment 2-1:

Figure 1 and figure 2 are not very informative and I suggest moving these to the supplementary information

Response 2-1:

We agree with this suggestion from Reviewer 2. We have removed Figure 1 and Figure 4 to the supplementary figures, and reordered the sequence of the corresponding supplementary figures.

Comment 2-2:

Line 89-90: The authors refer to table S1 in relation to the correction of sequencing errors. However, this table does not provide any information about sequencing errors.

Response 2-2:

We apologize for this inaccurate description. We have revised the main text to address this error, see lines 87–88.

Comment 2-3:

Line 90-91: The authors refer to table S2 and Fig S1. However, table S2 shows a summary of the pseudo chromosomes, not Hi-C scaffolds. Furthermore, in table S1 the authors show that there are 2123 Hi-C scaffolds. Please elaborate and clarify.

Response 2-3:

We regret the error in this description. Indeed, we state the length of the pseudo-chromosomes in the goose genome in Table S2 and present the Hi-C interaction contact heatmap of the pseudo-chromosomes in Figure S3. There are 2123 scaffolds in our genome assembly. This includes 68 scaffolds of 200bp to 2000bp, 2016 scaffolds of 2000bp to 350000bp, and 39 pseudo-chromosomes that are greater than 1Mb.

Comment 2-4:

Line 119-121: Again, the reference to the table/figure does not seem to match very well with the information in the text. We suggest to add the number of PCG's to table 3. Also, does figure 2 only show the TSS for PCG or does it also include those for lncRNAs.

Response 2-4:

Thank you for this valuable suggestion. Accordingly, we have added the number of PCGs to Table 3. In Figure 2, we show the TSSs for PCGs. We have redrawn Figure 2.

Comment 2-5:

Line 128: I am confused by the comment that the current assembly has more scaffolds. Given that the assembly is improved with higher N50 values for the contigs and scaffolds, I would assume that the number would be smaller.

Response 2-5:

Thank you for raising this point. To display the quality of the genome assemblies, we analyzed the distribution of their scaffold lengths. In our goose genome, with the exception of the 39 pseudo-chromosomes, lengths of scaffolds are distributed from 350kb (Table 4). This indicates that our assembly contains 39 pseudo-chromosomes (longer than 1Mb) and 2016 scaffolds with lengths ranging from 2kb to 350kb). To supply more information for researchers, we did not filter the 2kb–350kb scaffolds from our genome assembly data. As a result, we have reported more scaffolds in this study than were reported in two previous studies. However, as the 39 pseudo-chromosomes we assembled account for 88.36% of the genome (Table 4, Figure 2), (The table and figures were accessible from Response\_sup.pdf at: [https://fnca1-my.sharepoint.com/:b:/g/personal/guanglianggaocq\\_lwh\\_world/EQSV0ZIBk9HlaxEnZFufdcBf\\_eOaki7d4jJkNUz9Yrwpw?e](https://fnca1-my.sharepoint.com/:b:/g/personal/guanglianggaocq_lwh_world/EQSV0ZIBk9HlaxEnZFufdcBf_eOaki7d4jJkNUz9Yrwpw?e)) this suggests that our genome assembly is an improvement on previous goose assemblies.

Comment 2-6:

Line 129-131: This statement is not supported by table 3. In fact, the other studies seem to have annotated more gene scaffolds than the current assembly.

Response 2-6:

Thank you for this useful comment. In this study, we annotated more repeat regions (8.67%) (Table S3) and exon sequences (26,883,354bp, 2.41%) (Table 3) than in previous studies (Table 3). This suggests that we have generated an improved genome assembly and annotation. We have revised lines 132–133 of the manuscript to address this point.

Comment 2-7:

Line 195-196: "... indicating that disease resistance may help ....". I don't think this statement is supported by the results and tends to be mere story telling.

Response 2-7:

Thank you for identifying this issue. In lines 198–211, we have revised the original text as follows: "Some of these PSGs, GCH1 (GTP-cyclohydrolase I), are associated with parkinsonism, dystonia, and phenylketonuria disease in humans [7, 8]. GCH1 plays a role in adaptation to high-altitude environments in humans, where they relate to a lower hemoglobin level, nitric oxide concentration, and oxygen saturation in the blood. Furthermore, previous studies have shown GCH1 divergence between human populations living at different altitudes [9]. Selection acting on GCH1 in goose is likely to be related to their adaptation to high altitude or migratory habitats. SNW1 (SNW1 Domain Containing 1) is involved in the Nuclear Factor Kappa B pathway and is associated with oculopharyngeal muscular dystrophy disease [10, 11]. The depletion of this gene in breast cells leads to the induction of apoptosis, while the overexpression of this gene impedes neural crest development [12]. Selection acting on SNW1 in goose suggests that it may confer protection from diseases and aid adaptation in changeable environments. POU2F3 is involved in the discrimination of taste qualities, such as sweet, umami and bitter characteristics. Deficiency in this gene in mice alters the electrophysiology and behavioral responses to taste characters [13, 14]. Selection acting on POU2F3 in goose is likely to be related to a requirement for seeking food in variable migratory habitats."

References

1. Burton JN, Adey A, Patwardhan RP, Qiu R, Kitzman JO, Shendure J. Chromosome-scale scaffolding of de novo genome assemblies based on chromatin interactions. *Nat Biotechnol.* 2013; 31(12): 1119-1125.
2. Ghurye J, Rhie A, Walenz BP, et al. Integrating Hi-C links with assembly graphs for chromosome-scale assembly. *PLoS Biol.* 2019; 15(8): e1007273.
3. Liu B, Shi Y, Yuan J, et al. Estimation of genomic characteristics by analyzing k-mer frequency in de novo genome projects. *BMC Genomics.* 2013; 14(1): 10.
4. Wang G, Jin L, Li Y, et al. Transcriptomic analysis between Normal and high-intake feeding geese provides insight into lipid deposition and susceptibility to fatty liver in migratory birds. *BMC Genomics.* 2019; 20(1): 372.
5. Lu L, Chen Y, Wang Z, et al. The goose genome sequence leads to insights into the evolution of waterfowl and susceptibility to fatty liver. *Genome Biol.* 2015; 16(1): 89.
6. Gao G, Zhao X, Li Q, et al. Genome and metagenome analyses reveal adaptive evolution of the host and interaction with microbiota in the goose. *Sci Rep.* 2016; 6: 32961.
7. Yoshino H, Nishioka K, Li Y, et al. GCH1 mutations in dopa-responsive dystonia and Parkinson's disease. *J Neurol.* 2018; 265(10): 1860-1870.
8. Gu Y, Lu K, Yang G, et al. Mutation spectrum of six genes in Chinese phenylketonuria patients obtained through next-generation sequencing. *PLoS One.* 2014; 9(4): e94100.
9. Guo YB, He YX, Cui CY, et al. GCH1 plays a role in the high-altitude adaptation of Tibetans. *Zool Res.* 2017; 38(3): 155-160.
10. Verma S, De Jesus P, Chanda SK, Verma IM. SNW1, a Novel Transcriptional Regulator of the NF- $\kappa$ B Pathway. *Mol Cell Biochem.* 2019; 39(3): e00415-18.
11. Tolde O, Folk P. Stress-induced expression of p53 target genes is insensitive to SNW1/SKIP downregulation. *Cell Mol Life Sci.* 2011; 16(3): 373-384.
12. Wu MY, Ramel MC, Howell M, Hill CS. SNW1 is a critical regulator of spatial BMP activity, neural plate border formation and neural crest specification in vertebrate embryos. *PLoS Biol.* 2011; 9(2): e1000593.
13. Huang YH, Klingbeil O, He XY, et al. POU2F3 is a master regulator of a tuft cell-like variant of small cell lung cancer. *Genes Dev.* 2018; 32(13-14): 915-928.
14. Matsumoto I, Ohmoto M, Narukawa M, Yoshihara Y, Abe K. Skn-1a (Pou2f3) specifies taste receptor cell lineage. *Nat Neurosci.* 2011; 14(6): 685-687.

Close
